# Supplementary material for: Lidocaine alleviates pulmonary fibrosis by attenuating fibroblast activation and restoring lung microbiome-metabolome homeostasis
Source: Research Square preprint supplement (doi:10.21203/rs.3.rs-8111009/v1), 2025-12-18
Supplement: Supplementary file 1 [file 29ee4663698ea2ad7b0d3155.pdf]

● The original uncropped blots of Figure 2D:

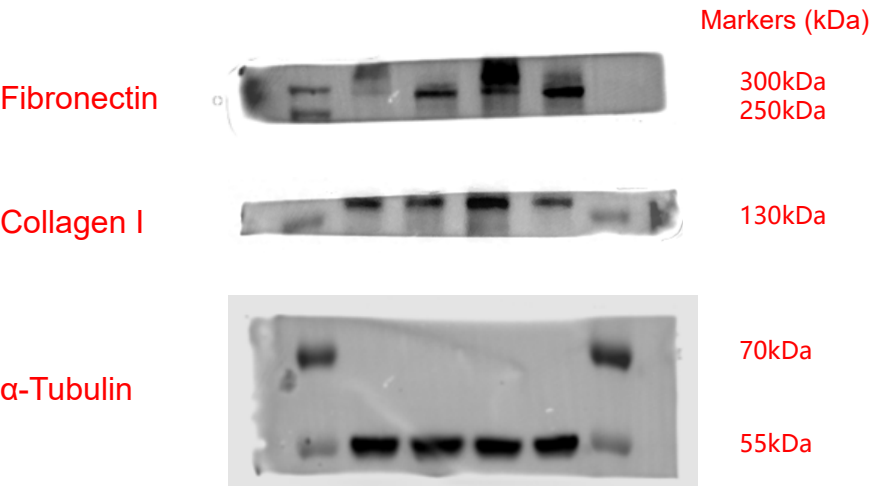

● The original uncropped blots of Figure 3A:

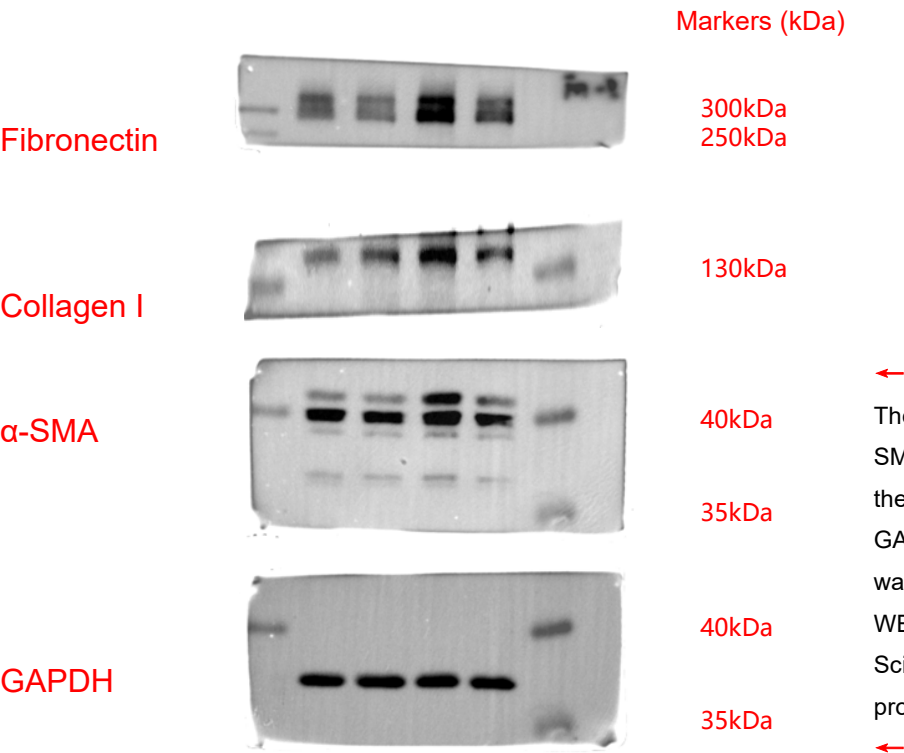

←  
The membrane was first probed with  $\alpha$ -SMA (Cat# 67735-1-Ig, Proteintech), then stripped and re-probed with GAPDH (Cat# 2118, CST). Stripping was performed using RESTORE WESTERN BLOT (Cat# 21059, Thermo Scientific) following the manufacturer's protocol.  
←

● The original uncropped blots of Figure 3C:

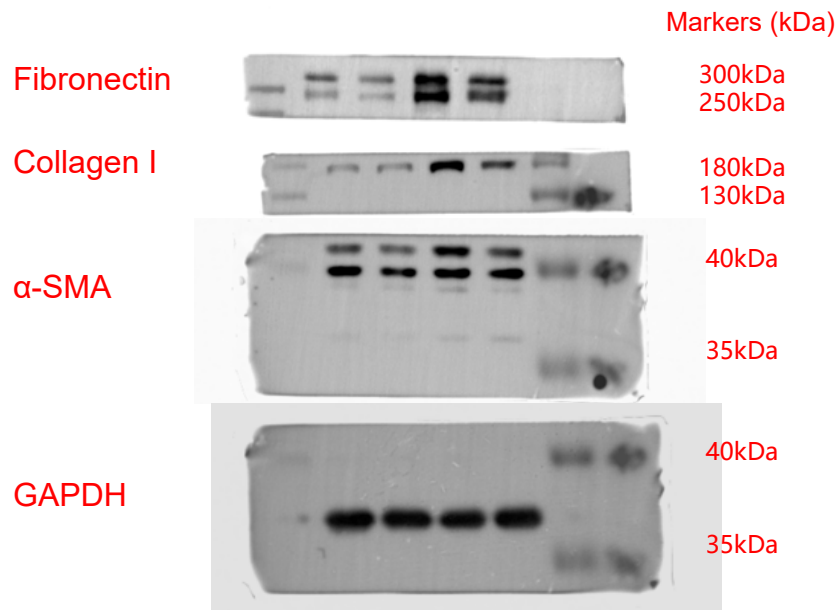

← The membrane was first probed with α-SMA (Cat# 67735-1-Ig, Proteintech), then stripped and re-probed with GAPDH (Cat# 2118, CST). Stripping was performed using RESTORE WESTERN BLOT (Cat# 21059, Thermo Scientific) following the manufacturer's protocol.

←

● The original uncropped blots of Figure 4C:

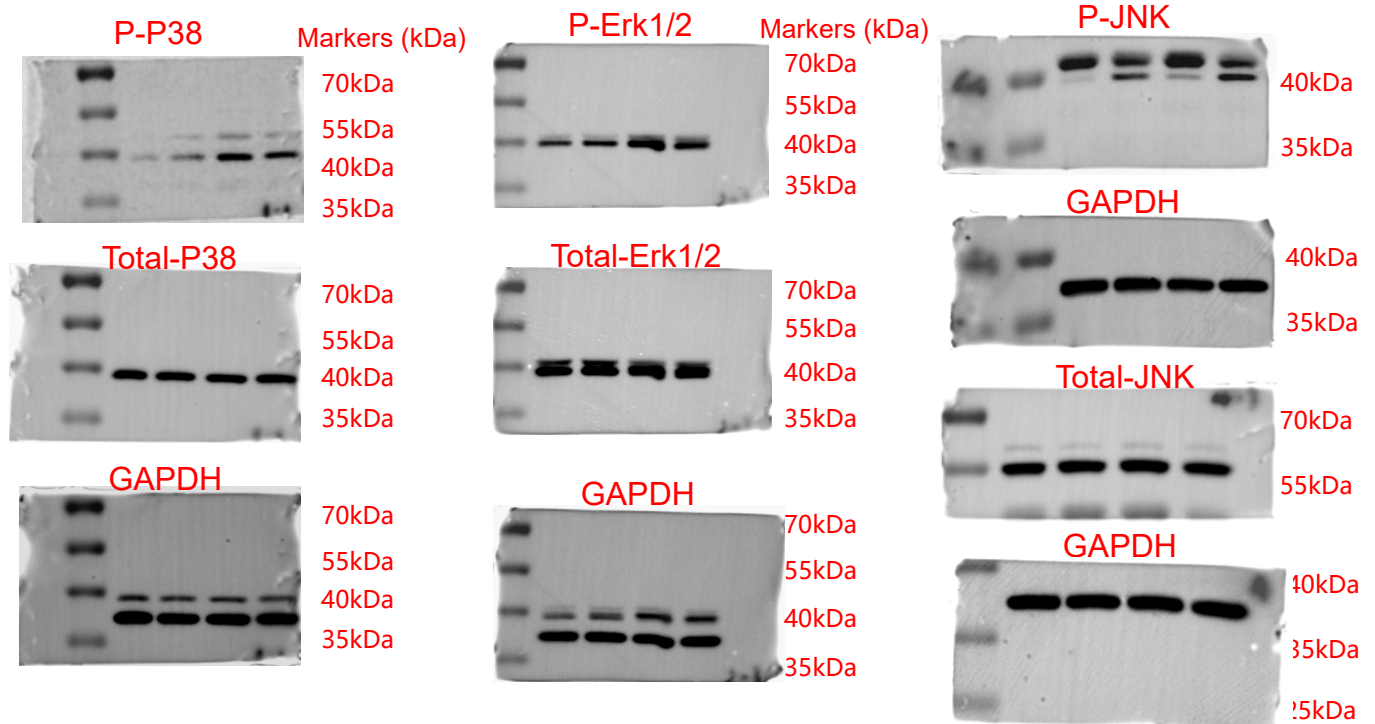

All blots shown were derived from the same membrane. Stripping was performed using RESTORE WESTERN BLOT (Cat# 21059, Thermo Scientific) following the manufacturer's protocol.

All blots shown were derived from the same membrane. Stripping was performed using RESTORE WESTERN BLOT (Cat# 21059, Thermo Scientific) following the manufacturer's protocol.

Blots of P-JNK and its corresponding GAPDH were derived from the same membrane. Stripping was performed using RESTORE WESTERN BLOT (Cat# 21059, Thermo Scientific) following the manufacturer's protocol.
