# Supplementary material for: Lidocaine alleviates pulmonary fibrosis by attenuating fibroblast activation and restoring lung microbiome-metabolome homeostasis
Source: Research Square preprint supplement (doi:10.21203/rs.3.rs-8111009/v1), 2025-12-18
Supplement: Supplementary file 1 [file 5814b3b9873975656f7d5aca.xlsx]

## Sheet: Table S1
Table S1. The differentially expressed proteins of all fibroblast groups
Protein accession	Protein description	Gene name	TGF-β1+lidocaine/TGF-β1 Ratio	TGF-β1+lidocaine/TGF-β1 CV	Regulated Type	Coverage [%]	Peptides	Razor + unique peptides	Unique peptides	Intensity TGF-β1-1	Intensity TGF-β1-2	Intensity TGF-β1+lidocaine-1	Intensity TGF-β1+lidocaine-2	TGF-β1-1	TGF-β1-2	TGF-β1+lidocaine-1	TGF-β1+lidocaine-2	Subcellular localization	KEGG KO No.	KEGG Gene	KEGG pathway	Biological Process	Cellular Component	Molecular Function	Pfam ID	Domain description	KOG category	KOG NO.	KOG description	WikiPathways	externalDetailsURL	Is_TF	Reactome pathway	Reactome link	HallMark	msigdbURL
O70469	Docking protein 2 OS=Mus musculus OX=10090 GN=Dok2 PE=1 SV=1	Dok2	0.584889	0.0158474	Down	9.22	3	3	3	3586.87	4465.06	2121.43	2582.3	1.04536	1.3013	0.618273	0.752589	nucleus	K20234			GO:0000902 cell morphogenesis; GO:0000904 cell morphogenesis involved in differentiation; GO:0001700 embryonic development via the syncytial blastoderm; GO:0001932 regulation of protein phosphorylation; GO:0001933 negative regulation of protein phosphorylation; GO:0002009 morphogenesis of an epithelium; GO:0002165 instar larval or pupal development; GO:0002376 immune system process; GO:0006928 mo…	GO:0005622 intracellular anatomical structure; GO:0005737 cytoplasm; GO:0005829 cytosol; GO:0005938 cell cortex; GO:0071944 cell periphery; GO:0099568 cytoplasmic region;	GO:0005068 transmembrane receptor protein tyrosine kinase adaptor activity; GO:0005102 signaling receptor binding; GO:0005488 binding; GO:0005515 protein binding; GO:0019899 enzyme binding; GO:0019900 kinase binding; GO:0019901 protein kinase binding; GO:0030674 protein-macromolecule adaptor activity; GO:0030971 receptor tyrosine kinase binding; GO:0035591 signaling adaptor activity; GO:0060090 m…	PF00169; PF02174	PF00169 PH domain; PF02174 PTB domain (IRS-1 type)	T	KOG4047	Docking protein 1 (p62dok)	WP572 EGFR1 signaling pathway	http://www.wikipathways.org/instance/WP572_r117874		R-MMU-109582 Hemostasis;R-MMU-1266738 Developmental Biology;R-MMU-202733 Cell surface interactions at the vascular wall;R-MMU-210993 Tie2 Signaling;R-MMU-422475 Axon guidance;R-MMU-8853659 RET signaling;R-MMU-9675108 Nervous system development	https://reactome.org/PathwayBrowser/#/R-MMU-109582;https://reactome.org/PathwayBrowser/#/R-MMU-1266738;https://reactome.org/PathwayBrowser/#/R-MMU-202733;https://reactome.org/PathwayBrowser/#/R-MMU-210993;https://reactome.org/PathwayBrowser/#/R-MMU-422475;https://reactome.org/PathwayBrowser/#/R-MMU-8853659;https://reactome.org/PathwayBrowser/#/R-MMU-9675108
P02802	Metallothionein-1 OS=Mus musculus OX=10090 GN=Mt1 PE=1 SV=1	Mt1	2.3647	0.0589885	Up	19.67	1	1	1	2914.86	5479.28	7180.27	12416.4	0.505385	0.95001	1.24493	2.15278	extracellular	K14739	MT1_2; metallothionein 1/2	mmu04978 Mineral absorption	GO:0006873 cellular ion homeostasis; GO:0006875 cellular metal ion homeostasis; GO:0006882 cellular zinc ion homeostasis; GO:0006950 response to stress; GO:0007154 cell communication; GO:0007165 signal transduction; GO:0007263 nitric oxide mediated signal transduction; GO:0009636 response to toxic substance; GO:0009987 cellular process; GO:0010035 response to inorganic substance; GO:0010038 respo…	GO:0000323 lytic vacuole; GO:0005622 intracellular anatomical structure; GO:0005634 nucleus; GO:0005737 cytoplasm; GO:0005764 lysosome; GO:0005773 vacuole; GO:0005829 cytosol; GO:0043226 organelle; GO:0043227 membrane-bounded organelle; GO:0043229 intracellular organelle; GO:0043231 intracellular membrane-bounded organelle; GO:0048471 perinuclear region of cytoplasm;	GO:0005488 binding; GO:0005507 copper ion binding; GO:0008270 zinc ion binding; GO:0043167 ion binding; GO:0043169 cation binding; GO:0046872 metal ion binding; GO:0046914 transition metal ion binding;	PF00131	PF00131 Metallothionein	P	KOG4738	Predicted metallothionein	WP412 Oxidative stress response	http://www.wikipathways.org/instance/WP412_r117038		R-MMU-5660526 Response to metal ions;R-MMU-5661231 Metallothioneins bind metals;R-MMU-8953897 Cellular responses to stimuli	https://reactome.org/PathwayBrowser/#/R-MMU-5660526;https://reactome.org/PathwayBrowser/#/R-MMU-5661231;https://reactome.org/PathwayBrowser/#/R-MMU-8953897	HALLMARK HYPOXIA;HALLMARK UV RESPONSE DN	http://www.gsea-msigdb.org/gsea/msigdb/mouse/geneset/HALLMARK_HYPOXIA;http://www.gsea-msigdb.org/gsea/msigdb/mouse/geneset/HALLMARK_UV_RESPONSE_DN
P18293	Atrial natriuretic peptide receptor 1 OS=Mus musculus OX=10090 GN=Npr1 PE=1 SV=2	Npr1	1.52008	0.0552178	Up	0.95	1	1	1	7033.97	16390.3	10274.7	25887.3	0.474809	1.10638	0.693565	1.74745	plasma membrane	K12323	ANPRA; atrial natriuretic peptide receptor A [EC:4.6.1.2]	mmu04714 Thermogenesis; mmu04270 Vascular smooth muscle contraction; mmu04024 cAMP signaling pathway; mmu01100 Metabolic pathways; mmu04923 Regulation of lipolysis in adipocytes; mmu00230 Purine metabolism; mmu04921 Oxytocin signaling pathway; mmu04924 Renin secretion; mmu04022 cGMP-PKG signaling pathway; mmu04925 Aldosterone synthesis and secretion	GO:0000003 reproduction; GO:0001501 skeletal system development; GO:0001558 regulation of cell growth; GO:0003008 system process; GO:0003013 circulatory system process; GO:0003014 renal system process; GO:0003018 vascular process in circulatory system; GO:0006139 nucleobase-containing compound metabolic process; GO:0006163 purine nucleotide metabolic process; GO:0006164 purine nucleotide biosynth…	GO:0005622 intracellular anatomical structure; GO:0005737 cytoplasm; GO:0005829 cytosol; GO:0005886 plasma membrane; GO:0005887 integral component of plasma membrane; GO:0008074 guanylate cyclase complex, soluble; GO:0016020 membrane; GO:0016021 integral component of membrane; GO:0031224 intrinsic component of membrane; GO:0031226 intrinsic component of plasma membrane; GO:0032991 protein-contain…	GO:0000166 nucleotide binding; GO:0001653 peptide receptor activity; GO:0001882 nucleoside binding; GO:0001883 purine nucleoside binding; GO:0003824 catalytic activity; GO:0004383 guanylate cyclase activity; GO:0004888 transmembrane signaling receptor activity; GO:0004930 G protein-coupled receptor activity; GO:0005488 binding; GO:0005515 protein binding; GO:0005524 ATP binding; GO:0005525 GTP bi…	PF07714; PF00211	PF07714 Protein tyrosine and serine/threonine kinase; PF00211 Adenylate and Guanylate cyclase catalytic domain	T	KOG1023	Natriuretic peptide receptor, guanylate cyclase	WP2185 Purine metabolism;WP1763 Mechanisms associated with pluripotency	http://www.wikipathways.org/instance/WP2185_r123340;http://www.wikipathways.org/instance/WP1763_r120787		R-MMU-397014 Muscle contraction;R-MMU-5576891 Cardiac conduction;R-MMU-5578768 Physiological factors	https://reactome.org/PathwayBrowser/#/R-MMU-397014;https://reactome.org/PathwayBrowser/#/R-MMU-5576891;https://reactome.org/PathwayBrowser/#/R-MMU-5578768
P59110	Sentrin-specific protease 1 OS=Mus musculus OX=10090 GN=Senp1 PE=1 SV=1	Senp1	1.67239	0.0533216	Up	2.81	2	2	2	2134.01	1729.46	3434.33	3001.38	0.7653	0.62022	1.23162	1.07636	cytoplasm	K08592			GO:0002682 regulation of immune system process; GO:0006282 regulation of DNA repair; GO:0006355 regulation of transcription, DNA-templated; GO:0006357 regulation of transcription by RNA polymerase II; GO:0006464 cellular protein modification process; GO:0006508 proteolysis; GO:0006807 nitrogen compound metabolic process; GO:0006915 apoptotic process; GO:0006919 activation of cysteine-type endopep…	GO:0005622 intracellular anatomical structure; GO:0005634 nucleus; GO:0005635 nuclear envelope; GO:0005654 nucleoplasm; GO:0005737 cytoplasm; GO:0005912 adherens junction; GO:0005925 focal adhesion; GO:0012505 endomembrane system; GO:0016020 membrane; GO:0030054 cell junction; GO:0030055 cell-substrate junction; GO:0031090 organelle membrane; GO:0031965 nuclear membrane; GO:0031967 organelle enve…	GO:0003824 catalytic activity; GO:0004175 endopeptidase activity; GO:0004197 cysteine-type endopeptidase activity; GO:0008233 peptidase activity; GO:0008234 cysteine-type peptidase activity; GO:0016787 hydrolase activity; GO:0016929 SUMO-specific protease activity; GO:0019783 ubiquitin-like protein-specific protease activity; GO:0070122 isopeptidase activity; GO:0070137 ubiquitin-like protein-spe…	PF02902	PF02902 Ulp1 protease family, C-terminal catalytic domain	O	KOG0778	Protease, Ulp1 family				R-MMU-162582 Signal Transduction;R-MMU-194315 Signaling by Rho GTPases;R-MMU-2990846 SUMOylation;R-MMU-3065679 SUMO is proteolytically processed;R-MMU-3215018 Processing and activation of SUMO;R-MMU-392499 Metabolism of proteins;R-MMU-597592 Post-translational protein modification;R-MMU-9012999 RHO GTPase cycle;R-MMU-9035034 RHOF GTPase cycle;R-MMU-9716542 Signaling by Rho GTPases, Miro GTPases a…	https://reactome.org/PathwayBrowser/#/R-MMU-162582;https://reactome.org/PathwayBrowser/#/R-MMU-194315;https://reactome.org/PathwayBrowser/#/R-MMU-2990846;https://reactome.org/PathwayBrowser/#/R-MMU-3065679;https://reactome.org/PathwayBrowser/#/R-MMU-3215018;https://reactome.org/PathwayBrowser/#/R-MMU-392499;https://reactome.org/PathwayBrowser/#/R-MMU-597592;https://reactome.org/PathwayBrowser/#/R…
P97819	85/88 kDa calcium-independent phospholipase A2 OS=Mus musculus OX=10090 GN=Pla2g6 PE=1 SV=3	Pla2g6	0.636814	0.0601576	Down	1.49	1	1	1	1553.45	2638.63	1031.34	1608.84	0.822769	1.39752	0.546239	0.852106	mitochondria	K16343	PLA2G6; calcium-independent phospholipase A2 [EC:3.1.1.4]	mmu00591 Linoleic acid metabolism; mmu00565 Ether lipid metabolism; mmu04666 Fc gamma R-mediated phagocytosis; mmu04270 Vascular smooth muscle contraction; mmu01100 Metabolic pathways; mmu00592 alpha-Linolenic acid metabolism; mmu00590 Arachidonic acid metabolism; mmu04750 Inflammatory mediator regulation of TRP channels; mmu04014 Ras signaling pathway; mmu00564 Glycerophospholipid metabolism	GO:0000003 reproduction; GO:0001932 regulation of protein phosphorylation; GO:0001934 positive regulation of protein phosphorylation; GO:0002252 immune effector process; GO:0002253 activation of immune response; GO:0002376 immune system process; GO:0002429 immune response-activating cell surface receptor signaling pathway; GO:0002431 Fc receptor mediated stimulatory signaling pathway; GO:0002433 …	GO:0005576 extracellular region; GO:0005615 extracellular space; GO:0005622 intracellular anatomical structure; GO:0005737 cytoplasm; GO:0005739 mitochondrion; GO:0005740 mitochondrial envelope; GO:0005743 mitochondrial inner membrane; GO:0005815 microtubule organizing center; GO:0005829 cytosol; GO:0005856 cytoskeleton; GO:0015630 microtubule cytoskeleton; GO:0016020 membrane; GO:0019866 organel…	GO:0003824 catalytic activity; GO:0004620 phospholipase activity; GO:0004623 phospholipase A2 activity; GO:0005488 binding; GO:0005515 protein binding; GO:0016298 lipase activity; GO:0016787 hydrolase activity; GO:0016788 hydrolase activity, acting on ester bonds; GO:0017171 serine hydrolase activity; GO:0019899 enzyme binding; GO:0019900 kinase binding; GO:0019901 protein kinase binding; GO:0043…			I	KOG0513	Ca2+-independent phospholipase A2	WP4350 Omega-3 / omega-6 fatty acid synthesis;WP4335 Eicosanoid lipid synthesis map;WP4347 Eicosanoid metabolism via cyclooxygenases (COX);WP2432 Spinal cord injury;WP318 Eicosanoid synthesis	http://www.wikipathways.org/instance/WP4350_r123513;http://www.wikipathways.org/instance/WP4335_r117875;http://www.wikipathways.org/instance/WP4347_r116511;http://www.wikipathways.org/instance/WP2432_r116842;http://www.wikipathways.org/instance/WP318_r117878		R-MMU-1430728 Metabolism;R-MMU-1482788 Acyl chain remodelling of PC;R-MMU-1482839 Acyl chain remodelling of PE;R-MMU-1483206 Glycerophospholipid biosynthesis;R-MMU-1483257 Phospholipid metabolism;R-MMU-168249 Innate Immune System;R-MMU-168256 Immune System;R-MMU-199991 Membrane Trafficking;R-MMU-2029480 Fcgamma receptor (FCGR) dependent phagocytosis;R-MMU-2029485 Role of phospholipids in phagocyt…	https://reactome.org/PathwayBrowser/#/R-MMU-1430728;https://reactome.org/PathwayBrowser/#/R-MMU-1482788;https://reactome.org/PathwayBrowser/#/R-MMU-1482839;https://reactome.org/PathwayBrowser/#/R-MMU-1483206;https://reactome.org/PathwayBrowser/#/R-MMU-1483257;https://reactome.org/PathwayBrowser/#/R-MMU-168249;https://reactome.org/PathwayBrowser/#/R-MMU-168256;https://reactome.org/PathwayBrowser/#…
Q00417	Transcription factor 7 OS=Mus musculus OX=10090 GN=Tcf7 PE=1 SV=2	Tcf7	0.581489	0.0382543	Down	2.63	1	1	0	2941.78	1923	1664.34	1148.45	1.51613	0.991071	0.857764	0.591885	nucleus	K02620	TCF7; transcription factor 7	mmu05165 Human papillomavirus infection; mmu04936 Alcoholic liver disease; mmu05213 Endometrial cancer; mmu05167 Kaposi sarcoma-associated herpesvirus infection; mmu05217 Basal cell carcinoma; mmu04916 Melanogenesis; mmu05226 Gastric cancer; mmu05225 Hepatocellular carcinoma; mmu04520 Adherens junction; mmu05215 Prostate cancer; mmu05216 Thyroid cancer; mmu05221 Acute myeloid leukemia; mmu04310 W…	GO:0000003 reproduction; GO:0000122 negative regulation of transcription by RNA polymerase II; GO:0001775 cell activation; GO:0002200 somatic diversification of immune receptors; GO:0002376 immune system process; GO:0002520 immune system development; GO:0002521 leukocyte differentiation; GO:0002562 somatic diversification of immune receptors via germline recombination within a single locus; GO:00…	GO:0000228 nuclear chromosome; GO:0000785 chromatin; GO:0000791 euchromatin; GO:0005622 intracellular anatomical structure; GO:0005634 nucleus; GO:0005654 nucleoplasm; GO:0005667 transcription regulator complex; GO:0005694 chromosome; GO:0016604 nuclear body; GO:0031974 membrane-enclosed lumen; GO:0031981 nuclear lumen; GO:0032991 protein-containing complex; GO:0043226 organelle; GO:0043227 membr…	GO:0000976 transcription cis-regulatory region binding; GO:0000977 RNA polymerase II transcription regulatory region sequence-specific DNA binding; GO:0000978 RNA polymerase II cis-regulatory region sequence-specific DNA binding; GO:0000981 DNA-binding transcription factor activity, RNA polymerase II-specific; GO:0000987 cis-regulatory region sequence-specific DNA binding; GO:0001067 transcriptio…	PF00505	PF00505 HMG (high mobility group) box	K	KOG3248	Transcription factor TCF-4	WP1763 Mechanisms associated with pluripotency	http://www.wikipathways.org/instance/WP1763_r120787	Transcription factor	R-MMU-162582 Signal Transduction;R-MMU-195253 Degradation of beta-catenin by the destruction complex;R-MMU-195721 Signaling by WNT;R-MMU-201681 TCF dependent signaling in response to WNT;R-MMU-201722 Formation of the beta-catenin:TCF transactivating complex;R-MMU-212436 Generic Transcription Pathway;R-MMU-3769402 Deactivation of the beta-catenin transactivating complex;R-MMU-4641265 Repression of…	https://reactome.org/PathwayBrowser/#/R-MMU-162582;https://reactome.org/PathwayBrowser/#/R-MMU-195253;https://reactome.org/PathwayBrowser/#/R-MMU-195721;https://reactome.org/PathwayBrowser/#/R-MMU-201681;https://reactome.org/PathwayBrowser/#/R-MMU-201722;https://reactome.org/PathwayBrowser/#/R-MMU-212436;https://reactome.org/PathwayBrowser/#/R-MMU-3769402;https://reactome.org/PathwayBrowser/#/R-M…	HALLMARK WNT BETA CATENIN SIGNALING	http://www.gsea-msigdb.org/gsea/msigdb/mouse/geneset/HALLMARK_WNT_BETA_CATENIN_SIGNALING
Q3U2S8	Voltage-gated hydrogen channel 1 OS=Mus musculus OX=10090 GN=Hvcn1 PE=1 SV=2	Hvcn1	1.57831	0.011739	Up	10.41	2	2	2	1310.89	598.81	2086.17	937.265	1.25462	0.573108	1.99663	0.897035	plasma membrane	K22644			GO:0000003 reproduction; GO:0001775 cell activation; GO:0002252 immune effector process; GO:0002263 cell activation involved in immune response; GO:0002274 myeloid leukocyte activation; GO:0002275 myeloid cell activation involved in immune response; GO:0002283 neutrophil activation involved in immune response; GO:0002366 leukocyte activation involved in immune response; GO:0002376 immune system p…	GO:0005622 intracellular anatomical structure; GO:0005737 cytoplasm; GO:0005886 plasma membrane; GO:0005887 integral component of plasma membrane; GO:0012505 endomembrane system; GO:0012506 vesicle membrane; GO:0016020 membrane; GO:0016021 integral component of membrane; GO:0030141 secretory granule; GO:0030659 cytoplasmic vesicle membrane; GO:0030667 secretory granule membrane; GO:0031090 organe…	GO:0005215 transporter activity; GO:0005216 ion channel activity; GO:0005244 voltage-gated ion channel activity; GO:0005261 cation channel activity; GO:0005488 binding; GO:0005515 protein binding; GO:0008270 zinc ion binding; GO:0008324 cation transmembrane transporter activity; GO:0015075 ion transmembrane transporter activity; GO:0015078 proton transmembrane transporter activity; GO:0015252 pro…									R-MMU-1187000 Fertilization;R-MMU-1222556 ROS and RNS production in phagocytes;R-MMU-1300642 Sperm Motility And Taxes;R-MMU-1474165 Reproduction;R-MMU-168249 Innate Immune System;R-MMU-168256 Immune System;R-MMU-6798695 Neutrophil degranulation	https://reactome.org/PathwayBrowser/#/R-MMU-1187000;https://reactome.org/PathwayBrowser/#/R-MMU-1222556;https://reactome.org/PathwayBrowser/#/R-MMU-1300642;https://reactome.org/PathwayBrowser/#/R-MMU-1474165;https://reactome.org/PathwayBrowser/#/R-MMU-168249;https://reactome.org/PathwayBrowser/#/R-MMU-168256;https://reactome.org/PathwayBrowser/#/R-MMU-6798695
Q61206	Platelet-activating factor acetylhydrolase IB subunit alpha2 OS=Mus musculus OX=10090 GN=Pafah1b2 PE=1 SV=2	Pafah1b2	1.50571	0.0276827	Up	3.93	1	1	1	5265.9	5456.67	8084.1	8055.31	0.685326	0.710154	1.0521	1.04835	cytoplasm	K16795	PAFAH1B2_3; platelet-activating factor acetylhydrolase IB subunit beta/gamma [EC:3.1.1.47]	mmu00565 Ether lipid metabolism; mmu01100 Metabolic pathways	GO:0000003 reproduction; GO:0001775 cell activation; GO:0002252 immune effector process; GO:0002263 cell activation involved in immune response; GO:0002274 myeloid leukocyte activation; GO:0002275 myeloid cell activation involved in immune response; GO:0002283 neutrophil activation involved in immune response; GO:0002366 leukocyte activation involved in immune response; GO:0002376 immune system p…	GO:0001650 fibrillar center; GO:0005576 extracellular region; GO:0005622 intracellular anatomical structure; GO:0005634 nucleus; GO:0005730 nucleolus; GO:0005737 cytoplasm; GO:0005829 cytosol; GO:0005886 plasma membrane; GO:0012505 endomembrane system; GO:0016020 membrane; GO:0030141 secretory granule; GO:0031410 cytoplasmic vesicle; GO:0031974 membrane-enclosed lumen; GO:0031981 nuclear lumen; G…	GO:0003824 catalytic activity; GO:0004620 phospholipase activity; GO:0004623 phospholipase A2 activity; GO:0005488 binding; GO:0005515 protein binding; GO:0016298 lipase activity; GO:0016407 acetyltransferase activity; GO:0016740 transferase activity; GO:0016746 acyltransferase activity; GO:0016747 acyltransferase activity, transferring groups other than amino-acyl groups; GO:0016787 hydrolase ac…	PF13472	PF13472 GDSL-like Lipase/Acylhydrolase family	TV	KOG1388	Attractin and platelet-activating factor acetylhydrolase				R-MMU-168249 Innate Immune System;R-MMU-168256 Immune System;R-MMU-199991 Membrane Trafficking;R-MMU-5653656 Vesicle-mediated transport;R-MMU-6798695 Neutrophil degranulation;R-MMU-6811436 COPI-independent Golgi-to-ER retrograde traffic;R-MMU-6811442 Intra-Golgi and retrograde Golgi-to-ER traffic;R-MMU-8856688 Golgi-to-ER retrograde transport	https://reactome.org/PathwayBrowser/#/R-MMU-168249;https://reactome.org/PathwayBrowser/#/R-MMU-168256;https://reactome.org/PathwayBrowser/#/R-MMU-199991;https://reactome.org/PathwayBrowser/#/R-MMU-5653656;https://reactome.org/PathwayBrowser/#/R-MMU-6798695;https://reactome.org/PathwayBrowser/#/R-MMU-6811436;https://reactome.org/PathwayBrowser/#/R-MMU-6811442;https://reactome.org/PathwayBrowser/#/…
Q61818	Retinoic acid-induced protein 1 OS=Mus musculus OX=10090 GN=Rai1 PE=1 SV=3	Rai1	1.517	0.0109463	Up	0.74	1	1	1	1045.27	782.546	1573.4	1196.31	0.836823	0.626492	1.25963	0.957743	nucleus	K19749			GO:0001501 skeletal system development; GO:0006355 regulation of transcription, DNA-templated; GO:0006357 regulation of transcription by RNA polymerase II; GO:0007275 multicellular organism development; GO:0007623 circadian rhythm; GO:0009889 regulation of biosynthetic process; GO:0009891 positive regulation of biosynthetic process; GO:0009893 positive regulation of metabolic process; GO:0010468 …	GO:0005622 intracellular anatomical structure; GO:0005634 nucleus; GO:0005654 nucleoplasm; GO:0005737 cytoplasm; GO:0005739 mitochondrion; GO:0031974 membrane-enclosed lumen; GO:0031981 nuclear lumen; GO:0043226 organelle; GO:0043227 membrane-bounded organelle; GO:0043229 intracellular organelle; GO:0043231 intracellular membrane-bounded organelle; GO:0043233 organelle lumen; GO:0070013 intracell…	GO:0001067 transcription regulatory region nucleic acid binding; GO:0003676 nucleic acid binding; GO:0003677 DNA binding; GO:0003700 DNA-binding transcription factor activity; GO:0005488 binding; GO:0097159 organic cyclic compound binding; GO:0140110 transcription regulator activity; GO:1901363 heterocyclic compound binding;	PF13771	PF13771 PHD-like zinc-binding domain	K	KOG1084	Transcription factor TCF20			Transcription factor
Q6ZQK0	Condensin-2 complex subunit D3 OS=Mus musculus OX=10090 GN=Ncapd3 PE=1 SV=3	Ncapd3	1.5594	0.0230035	Up	2.26	3	3	3	1690.03	955.399	2592.56	1514.08	1.05622	0.597098	1.62028	0.946258	cytoplasm	K11491			GO:0000003 reproduction; GO:0000018 regulation of DNA recombination; GO:0000019 regulation of mitotic recombination; GO:0000070 mitotic sister chromatid segregation; GO:0000278 mitotic cell cycle; GO:0000280 nuclear division; GO:0000819 sister chromatid segregation; GO:0006282 regulation of DNA repair; GO:0006323 DNA packaging; GO:0006996 organelle organization; GO:0007049 cell cycle; GO:0007059 …	GO:0000228 nuclear chromosome; GO:0000775 chromosome, centromeric region; GO:0000776 kinetochore; GO:0000779 condensed chromosome, centromeric region; GO:0000785 chromatin; GO:0000792 heterochromatin; GO:0000793 condensed chromosome; GO:0000794 condensed nuclear chromosome; GO:0000796 condensin complex; GO:0001674 female germ cell nucleus; GO:0005622 intracellular anatomical structure; GO:0005634…	GO:0003682 chromatin binding; GO:0005488 binding; GO:0005515 protein binding; GO:0035064 methylated histone binding; GO:0042393 histone binding; GO:0140030 modification-dependent protein binding; GO:0140034 methylation-dependent protein binding;			S	KOG0413	Uncharacterized conserved protein related to condensin complex subunit 1			Transcription factor	R-MMU-1640170 Cell Cycle;R-MMU-2299718 Condensation of Prophase Chromosomes;R-MMU-68875 Mitotic Prophase;R-MMU-68886 M Phase;R-MMU-69278 Cell Cycle, Mitotic	https://reactome.org/PathwayBrowser/#/R-MMU-1640170;https://reactome.org/PathwayBrowser/#/R-MMU-2299718;https://reactome.org/PathwayBrowser/#/R-MMU-68875;https://reactome.org/PathwayBrowser/#/R-MMU-68886;https://reactome.org/PathwayBrowser/#/R-MMU-69278
Q6ZQM0	E3 ubiquitin-protein ligase rififylin OS=Mus musculus OX=10090 GN=Rffl PE=1 SV=1	Rffl	1.58447	0.0463548	Up	1.86	1	1	1	815.998	1424.05	1335.3	2182.4	0.552294	0.963843	0.903774	1.47712	nucleus	K20804			GO:0000209 protein polyubiquitination; GO:0001959 regulation of cytokine-mediated signaling pathway; GO:0001960 negative regulation of cytokine-mediated signaling pathway; GO:0006464 cellular protein modification process; GO:0006508 proteolysis; GO:0006511 ubiquitin-dependent protein catabolic process; GO:0006807 nitrogen compound metabolic process; GO:0006810 transport; GO:0006886 intracellular …	GO:0005622 intracellular anatomical structure; GO:0005634 nucleus; GO:0005654 nucleoplasm; GO:0005737 cytoplasm; GO:0005768 endosome; GO:0005886 plasma membrane; GO:0010008 endosome membrane; GO:0012505 endomembrane system; GO:0016020 membrane; GO:0031090 organelle membrane; GO:0031410 cytoplasmic vesicle; GO:0031974 membrane-enclosed lumen; GO:0031981 nuclear lumen; GO:0031982 vesicle; GO:004322…	GO:0002020 protease binding; GO:0002039 p53 binding; GO:0003824 catalytic activity; GO:0004842 ubiquitin-protein transferase activity; GO:0005488 binding; GO:0005515 protein binding; GO:0005543 phospholipid binding; GO:0008270 zinc ion binding; GO:0008289 lipid binding; GO:0016740 transferase activity; GO:0019787 ubiquitin-like protein transferase activity; GO:0019899 enzyme binding; GO:0019900 k…	PF13920	PF13920 Zinc finger, C3HC4 type (RING finger)	O	KOG4275	Predicted E3 ubiquitin ligase				R-MMU-212436 Generic Transcription Pathway;R-MMU-3700989 Transcriptional Regulation by TP53;R-MMU-5633007 Regulation of TP53 Activity;R-MMU-6804757 Regulation of TP53 Degradation;R-MMU-6806003 Regulation of TP53 Expression and Degradation;R-MMU-73857 RNA Polymerase II Transcription;R-MMU-74160 Gene expression (Transcription)	https://reactome.org/PathwayBrowser/#/R-MMU-212436;https://reactome.org/PathwayBrowser/#/R-MMU-3700989;https://reactome.org/PathwayBrowser/#/R-MMU-5633007;https://reactome.org/PathwayBrowser/#/R-MMU-6804757;https://reactome.org/PathwayBrowser/#/R-MMU-6806003;https://reactome.org/PathwayBrowser/#/R-MMU-73857;https://reactome.org/PathwayBrowser/#/R-MMU-74160
Q7TN37	Transient receptor potential cation channel subfamily M member 4 OS=Mus musculus OX=10090 GN=Trpm4 PE=1 SV=1	Trpm4	1.51336	0.0136629	Up	1.9	2	2	2	1302.69	1420.19	1952.39	2170.02	0.780372	0.85076	1.16957	1.29994	plasma membrane	K04979	TRPM4; transient receptor potential cation channel subfamily M member 4	mmu04911 Insulin secretion	GO:0001508 action potential; GO:0001817 regulation of cytokine production; GO:0002027 regulation of heart rate; GO:0002376 immune system process; GO:0002407 dendritic cell chemotaxis; GO:0002682 regulation of immune system process; GO:0002697 regulation of immune effector process; GO:0002700 regulation of production of molecular mediator of immune response; GO:0002703 regulation of leukocyte medi…	GO:0005622 intracellular anatomical structure; GO:0005634 nucleus; GO:0005654 nucleoplasm; GO:0005737 cytoplasm; GO:0005783 endoplasmic reticulum; GO:0005794 Golgi apparatus; GO:0005829 cytosol; GO:0005886 plasma membrane; GO:0005887 integral component of plasma membrane; GO:0012505 endomembrane system; GO:0016020 membrane; GO:0016021 integral component of membrane; GO:0031224 intrinsic component…	GO:0000166 nucleotide binding; GO:0005215 transporter activity; GO:0005216 ion channel activity; GO:0005227 calcium activated cation channel activity; GO:0005244 voltage-gated ion channel activity; GO:0005261 cation channel activity; GO:0005262 calcium channel activity; GO:0005272 sodium channel activity; GO:0005488 binding; GO:0005509 calcium ion binding; GO:0005524 ATP binding; GO:0008324 catio…			PT	KOG3614	Ca2+/Mg2+-permeable cation channels (LTRPC family)				R-MMU-2672351 Stimuli-sensing channels;R-MMU-3295583 TRP channels;R-MMU-382551 Transport of small molecules;R-MMU-983712 Ion channel transport	https://reactome.org/PathwayBrowser/#/R-MMU-2672351;https://reactome.org/PathwayBrowser/#/R-MMU-3295583;https://reactome.org/PathwayBrowser/#/R-MMU-382551;https://reactome.org/PathwayBrowser/#/R-MMU-983712
Q80U04	E3 ubiquitin-protein ligase Praja-2 OS=Mus musculus OX=10090 GN=Pja2 PE=1 SV=2	Pja2	0.662417	0.0988683	Down	4.24	2	2	2	3097.5	2699.5	2195.28	1663.18	1.30768	1.13965	0.926785	0.702147	nucleus	K10634			GO:0001775 cell activation; GO:0001932 regulation of protein phosphorylation; GO:0001934 positive regulation of protein phosphorylation; GO:0002274 myeloid leukocyte activation; GO:0002376 immune system process; GO:0002682 regulation of immune system process; GO:0002684 positive regulation of immune system process; GO:0003008 system process; GO:0006464 cellular protein modification process; GO:00…	GO:0005622 intracellular anatomical structure; GO:0005737 cytoplasm; GO:0005856 cytoskeleton; GO:0005886 plasma membrane; GO:0016020 membrane; GO:0043226 organelle; GO:0043228 non-membrane-bounded organelle; GO:0043229 intracellular organelle; GO:0043232 intracellular non-membrane-bounded organelle; GO:0045111 intermediate filament cytoskeleton; GO:0071944 cell periphery;	GO:0003824 catalytic activity; GO:0004842 ubiquitin-protein transferase activity; GO:0005488 binding; GO:0005515 protein binding; GO:0016740 transferase activity; GO:0019787 ubiquitin-like protein transferase activity; GO:0019899 enzyme binding; GO:0019900 kinase binding; GO:0019901 protein kinase binding; GO:0034236 protein kinase A catalytic subunit binding; GO:0034237 protein kinase A regulato…	PF13639	PF13639 Ring finger domain	O	KOG0800	FOG: Predicted E3 ubiquitin ligase				R-MMU-1280218 Adaptive Immune System;R-MMU-168256 Immune System;R-MMU-983168 Antigen processing: Ubiquitination & Proteasome degradation;R-MMU-983169 Class I MHC mediated antigen processing & presentation	https://reactome.org/PathwayBrowser/#/R-MMU-1280218;https://reactome.org/PathwayBrowser/#/R-MMU-168256;https://reactome.org/PathwayBrowser/#/R-MMU-983168;https://reactome.org/PathwayBrowser/#/R-MMU-983169
Q80YA8	Protein crumbs homolog 2 OS=Mus musculus OX=10090 GN=Crb2 PE=1 SV=3	Crb2	1.67288	0.00442339	Up	2.81	3	3	3	2380.89	3733.17	3995.4	6225.61	0.579547	0.908714	0.972545	1.51541	extracellular,plasma membrane	K16681	CRB; protein crumbs	mmu04390 Hippo signaling pathway	GO:0000003 reproduction; GO:0000902 cell morphogenesis; GO:0000904 cell morphogenesis involved in differentiation; GO:0001654 eye development; GO:0001655 urogenital system development; GO:0001667 ameboidal-type cell migration; GO:0001700 embryonic development via the syncytial blastoderm; GO:0001702 gastrulation with mouth forming second; GO:0001704 formation of primary germ layer; GO:0001707 mes…	GO:0001917 photoreceptor inner segment; GO:0005886 plasma membrane; GO:0005902 microvillus; GO:0005911 cell-cell junction; GO:0005912 adherens junction; GO:0016020 membrane; GO:0016028 rhabdomere; GO:0016324 apical plasma membrane; GO:0016327 apicolateral plasma membrane; GO:0030054 cell junction; GO:0032991 protein-containing complex; GO:0035003 subapical complex; GO:0042995 cell projection; GO:…	GO:0005080 protein kinase C binding; GO:0005488 binding; GO:0005515 protein binding; GO:0008092 cytoskeletal protein binding; GO:0019899 enzyme binding; GO:0019900 kinase binding; GO:0019901 protein kinase binding; GO:0030507 spectrin binding;	PF00008; PF02210; PF12661	PF00008 EGF-like domain; PF02210 Laminin G domain; PF12661 Human growth factor-like EGF	T	KOG1217	Fibrillins and related proteins containing Ca2+-binding EGF-like domains
Q8BG15	CTD small phosphatase-like protein 2 OS=Mus musculus OX=10090 GN=Ctdspl2 PE=1 SV=1	Ctdspl2	0.540172	0.0761777	Down	4.09	2	2	2	2513.03	1571.59	1430.59	803.201	1.49853	0.937148	0.853069	0.478953	nucleus	K17616			GO:0006355 regulation of transcription, DNA-templated; GO:0006357 regulation of transcription by RNA polymerase II; GO:0006464 cellular protein modification process; GO:0006470 protein dephosphorylation; GO:0006793 phosphorus metabolic process; GO:0006796 phosphate-containing compound metabolic process; GO:0006807 nitrogen compound metabolic process; GO:0008152 metabolic process; GO:0009889 regul…	GO:0005622 intracellular anatomical structure; GO:0005634 nucleus; GO:0005654 nucleoplasm; GO:0031974 membrane-enclosed lumen; GO:0031981 nuclear lumen; GO:0043226 organelle; GO:0043227 membrane-bounded organelle; GO:0043229 intracellular organelle; GO:0043231 intracellular membrane-bounded organelle; GO:0043233 organelle lumen; GO:0070013 intracellular organelle lumen;	GO:0003824 catalytic activity; GO:0004721 phosphoprotein phosphatase activity; GO:0016787 hydrolase activity; GO:0016788 hydrolase activity, acting on ester bonds; GO:0016791 phosphatase activity; GO:0042578 phosphoric ester hydrolase activity; GO:0140096 catalytic activity, acting on a protein;			K	KOG1605	TFIIF-interacting CTD phosphatase, including NLI-interacting factor (involved in RNA polymerase II regulation)
Q8BMS9	Ras association domain-containing protein 2 OS=Mus musculus OX=10090 GN=Rassf2 PE=1 SV=1	Rassf2	0.583966	0.0772007	Down	7.98	2	2	2	1802.24	1864.71	994.994	1148.37	1.11215	1.1507	0.614005	0.708652	nucleus	K09851	RASSF2_4; Ras association domain-containing protein 2/4	mmu04392 Hippo signaling pathway - multiple species	GO:0001501 skeletal system development; GO:0001503 ossification; GO:0001932 regulation of protein phosphorylation; GO:0001933 negative regulation of protein phosphorylation; GO:0001934 positive regulation of protein phosphorylation; GO:0002682 regulation of immune system process; GO:0002761 regulation of myeloid leukocyte differentiation; GO:0006464 cellular protein modification process; GO:00064…	GO:0000775 chromosome, centromeric region; GO:0000776 kinetochore; GO:0005622 intracellular anatomical structure; GO:0005634 nucleus; GO:0005654 nucleoplasm; GO:0005694 chromosome; GO:0005737 cytoplasm; GO:0005794 Golgi apparatus; GO:0005829 cytosol; GO:0005886 plasma membrane; GO:0012505 endomembrane system; GO:0016020 membrane; GO:0031974 membrane-enclosed lumen; GO:0031981 nuclear lumen; GO:00…	GO:0003824 catalytic activity; GO:0004672 protein kinase activity; GO:0016301 kinase activity; GO:0016740 transferase activity; GO:0016772 transferase activity, transferring phosphorus-containing groups; GO:0016773 phosphotransferase activity, alcohol group as acceptor; GO:0140096 catalytic activity, acting on a protein;	PF00788; PF16517	PF00788 Ras association (RalGDS/AF-6) domain; PF16517 Novel Ras effector 1 C-terminal SARAH (Sav/Rassf/Hpo) domain	T	KOG4239	Ras GTPase effector RASSF2
Q8BYH8	Chromodomain-helicase-DNA-binding protein 9 OS=Mus musculus OX=10090 GN=Chd9 PE=1 SV=2	Chd9	2.08505	0.0912449	Up	2.63	7	2	2	904.089	1120.42	2006.7	2185.41	0.636943	0.789351	1.41375	1.53965	nucleus	K14438			GO:0000003 reproduction; GO:0000122 negative regulation of transcription by RNA polymerase II; GO:0000902 cell morphogenesis; GO:0000904 cell morphogenesis involved in differentiation; GO:0001501 skeletal system development; GO:0001568 blood vessel development; GO:0001654 eye development; GO:0001667 ameboidal-type cell migration; GO:0001701 in utero embryonic development; GO:0001775 cell activati…	GO:0005622 intracellular anatomical structure; GO:0005634 nucleus; GO:0005654 nucleoplasm; GO:0005730 nucleolus; GO:0031974 membrane-enclosed lumen; GO:0031981 nuclear lumen; GO:0032991 protein-containing complex; GO:0034708 methyltransferase complex; GO:0035097 histone methyltransferase complex; GO:0043226 organelle; GO:0043227 membrane-bounded organelle; GO:0043228 non-membrane-bounded organell…	GO:0000166 nucleotide binding; GO:0000976 transcription cis-regulatory region binding; GO:0000977 RNA polymerase II transcription regulatory region sequence-specific DNA binding; GO:0000978 RNA polymerase II cis-regulatory region sequence-specific DNA binding; GO:0000987 cis-regulatory region sequence-specific DNA binding; GO:0001067 transcription regulatory region nucleic acid binding; GO:000203…	PF00385; PF00176; PF00271; PF07533	PF00385 Chromo (CHRromatin Organisation MOdifier) domain; PF00176 SNF2-related domain; PF00271 Helicase conserved C-terminal domain; PF07533 BRK domain	K	KOG0384	Chromodomain-helicase DNA-binding protein				R-MMU-1430728 Metabolism;R-MMU-2262752 Cellular responses to stress;R-MMU-400206 Regulation of lipid metabolism by PPARalpha;R-MMU-556833 Metabolism of lipids;R-MMU-8953897 Cellular responses to stimuli;R-MMU-9707564 Cytoprotection by HMOX1;R-MMU-9711123 Cellular response to chemical stress	https://reactome.org/PathwayBrowser/#/R-MMU-1430728;https://reactome.org/PathwayBrowser/#/R-MMU-2262752;https://reactome.org/PathwayBrowser/#/R-MMU-400206;https://reactome.org/PathwayBrowser/#/R-MMU-556833;https://reactome.org/PathwayBrowser/#/R-MMU-8953897;https://reactome.org/PathwayBrowser/#/R-MMU-9707564;https://reactome.org/PathwayBrowser/#/R-MMU-9711123
Q8C4U3	Secreted frizzled-related protein 1 OS=Mus musculus OX=10090 GN=Sfrp1 PE=1 SV=3	Sfrp1	1.56261	0.0344777	Up	7.01	2	2	2	1950.85	1316.08	2974.09	2106.65	0.827952	0.558552	1.26222	0.894074	extracellular	K02166	SFRP1; secreted frizzled-related protein 1	mmu04310 Wnt signaling pathway	GO:0000003 reproduction; GO:0000902 cell morphogenesis; GO:0000904 cell morphogenesis involved in differentiation; GO:0001101 response to acid chemical; GO:0001501 skeletal system development; GO:0001503 ossification; GO:0001558 regulation of cell growth; GO:0001649 osteoblast differentiation; GO:0001655 urogenital system development; GO:0001657 ureteric bud development; GO:0001666 response to hy…	GO:0005576 extracellular region; GO:0005615 extracellular space; GO:0005622 intracellular anatomical structure; GO:0005737 cytoplasm; GO:0005829 cytosol; GO:0005886 plasma membrane; GO:0009986 cell surface; GO:0016020 membrane; GO:0016021 integral component of membrane; GO:0031012 extracellular matrix; GO:0031224 intrinsic component of membrane; GO:0062023 collagen-containing extracellular matrix…	GO:0001664 G protein-coupled receptor binding; GO:0003824 catalytic activity; GO:0004175 endopeptidase activity; GO:0004197 cysteine-type endopeptidase activity; GO:0004888 transmembrane signaling receptor activity; GO:0004930 G protein-coupled receptor activity; GO:0005102 signaling receptor binding; GO:0005109 frizzled binding; GO:0005488 binding; GO:0005515 protein binding; GO:0005539 glycosam…	PF01392; PF01759	PF01392 Fz domain; PF01759 UNC-6/NTR/C345C module	T	KOG3577	Smoothened and related G-protein-coupled receptors	WP3663 BMP signaling pathway in eyelid development;WP539 Wnt signaling pathway	http://www.wikipathways.org/instance/WP3663_r123371;http://www.wikipathways.org/instance/WP539_r120581				HALLMARK EPITHELIAL MESENCHYMAL TRANSITION	http://www.gsea-msigdb.org/gsea/msigdb/mouse/geneset/HALLMARK_EPITHELIAL_MESENCHYMAL_TRANSITION
Q8CIV2	Membralin OS=Mus musculus OX=10090 GN=Tmem259 PE=1 SV=2	Tmem259	0.622593	0.00970757	Down	7.84	4	4	4	3417.38	4387.93	2142.24	2713.14	1.06953	1.37328	0.670453	0.849127	plasma membrane				GO:0003002 regionalization; GO:0006950 response to stress; GO:0007275 multicellular organism development; GO:0007389 pattern specification process; GO:0007444 imaginal disc development; GO:0007447 imaginal disc pattern formation; GO:0007450 dorsal/ventral pattern formation, imaginal disc; GO:0009888 tissue development; GO:0009893 positive regulation of metabolic process; GO:0009894 regulation of …	GO:0005622 intracellular anatomical structure; GO:0005737 cytoplasm; GO:0005783 endoplasmic reticulum; GO:0012505 endomembrane system; GO:0043226 organelle; GO:0043227 membrane-bounded organelle; GO:0043229 intracellular organelle; GO:0043231 intracellular membrane-bounded organelle;				S	KOG2092	Uncharacterized conserved protein
Q8K3W3	Protein CASC3 OS=Mus musculus OX=10090 GN=Casc3 PE=1 SV=3	Casc3	1.72655	0.00042444	Up	1.72	1	1	1	875.483	499.732	1512.02	862.554	0.86871	0.495866	1.50032	0.855881	nucleus	K14323	CASC3; protein CASC3	mmu03013 Nucleocytoplasmic transport; mmu03015 mRNA surveillance pathway	GO:0000003 reproduction; GO:0000184 nuclear-transcribed mRNA catabolic process, nonsense-mediated decay; GO:0000226 microtubule cytoskeleton organization; GO:0000375 RNA splicing, via transesterification reactions; GO:0000377 RNA splicing, via transesterification reactions with bulged adenosine as nucleophile; GO:0000398 mRNA splicing, via spliceosome; GO:0000578 embryonic axis specification; GO:…	GO:0005622 intracellular anatomical structure; GO:0005634 nucleus; GO:0005635 nuclear envelope; GO:0005654 nucleoplasm; GO:0005737 cytoplasm; GO:0005829 cytosol; GO:0012505 endomembrane system; GO:0016020 membrane; GO:0031090 organelle membrane; GO:0031965 nuclear membrane; GO:0031967 organelle envelope; GO:0031974 membrane-enclosed lumen; GO:0031975 envelope; GO:0031981 nuclear lumen; GO:0032991…	GO:0005488 binding; GO:0005515 protein binding; GO:0019899 enzyme binding; GO:0031369 translation initiation factor binding; GO:0031625 ubiquitin protein ligase binding; GO:0042802 identical protein binding; GO:0044389 ubiquitin-like protein ligase binding;	PF09405	PF09405 CASC3/Barentsz eIF4AIII binding	R	KOG4264	Nucleo-cytoplasmic protein MLN51				R-MMU-159236 Transport of Mature mRNA derived from an Intron-Containing Transcript;R-MMU-72187 mRNA 3'-end processing;R-MMU-72202 Transport of Mature Transcript to Cytoplasm;R-MMU-72203 Processing of Capped Intron-Containing Pre-mRNA;R-MMU-73856 RNA Polymerase II Transcription Termination;R-MMU-73857 RNA Polymerase II Transcription;R-MMU-74160 Gene expression (Transcription);R-MMU-8953854 Metabol…	https://reactome.org/PathwayBrowser/#/R-MMU-159236;https://reactome.org/PathwayBrowser/#/R-MMU-72187;https://reactome.org/PathwayBrowser/#/R-MMU-72202;https://reactome.org/PathwayBrowser/#/R-MMU-72203;https://reactome.org/PathwayBrowser/#/R-MMU-73856;https://reactome.org/PathwayBrowser/#/R-MMU-73857;https://reactome.org/PathwayBrowser/#/R-MMU-74160;https://reactome.org/PathwayBrowser/#/R-MMU-8953…
Q8VHC3	Selenoprotein M OS=Mus musculus OX=10090 GN=Selenom PE=1 SV=3	Selenom	1.96928	0.0679779	Up	19.31	2	2	2	947.863	576.254	1776.88	1189.35	0.91151	0.554153	1.70873	1.14374	extracellular				GO:0003008 system process; GO:0006810 transport; GO:0006869 lipid transport; GO:0007154 cell communication; GO:0007267 cell-cell signaling; GO:0007275 multicellular organism development; GO:0008152 metabolic process; GO:0009888 tissue development; GO:0009914 hormone transport; GO:0009987 cellular process; GO:0010035 response to inorganic substance; GO:0010269 response to selenium ion; GO:0010817 …	GO:0005622 intracellular anatomical structure; GO:0005737 cytoplasm; GO:0005783 endoplasmic reticulum; GO:0005794 Golgi apparatus; GO:0012505 endomembrane system; GO:0043226 organelle; GO:0043227 membrane-bounded organelle; GO:0043229 intracellular organelle; GO:0043231 intracellular membrane-bounded organelle;		PF08806	PF08806 Sep15/SelM redox domain				WP108 Selenium metabolism / selenoproteins	http://www.wikipathways.org/instance/WP108_r117940
Q99M04	Lipoyl synthase, mitochondrial OS=Mus musculus OX=10090 GN=Lias PE=1 SV=1	Lias	1.63265	0.0684817	Up	2.95	1	1	1	2603.96	2479.76	4045.49	4244.63	0.761038	0.724739	1.18234	1.24054	mitochondria	K03644	lipA; lipoyl synthase [EC:2.8.1.8]	mmu00785 Lipoic acid metabolism; mmu01100 Metabolic pathways; mmu01240 Biosynthesis of cofactors	GO:0001838 embryonic epithelial tube formation; GO:0001841 neural tube formation; GO:0001843 neural tube closure; GO:0002009 morphogenesis of an epithelium; GO:0002237 response to molecule of bacterial origin; GO:0006082 organic acid metabolic process; GO:0006464 cellular protein modification process; GO:0006629 lipid metabolic process; GO:0006631 fatty acid metabolic process; GO:0006633 fatty ac…	GO:0005622 intracellular anatomical structure; GO:0005737 cytoplasm; GO:0005739 mitochondrion; GO:0005759 mitochondrial matrix; GO:0031974 membrane-enclosed lumen; GO:0043226 organelle; GO:0043227 membrane-bounded organelle; GO:0043229 intracellular organelle; GO:0043231 intracellular membrane-bounded organelle; GO:0043233 organelle lumen; GO:0070013 intracellular organelle lumen;	GO:0003824 catalytic activity; GO:0016740 transferase activity; GO:0016782 transferase activity, transferring sulphur-containing groups; GO:0016783 sulfurtransferase activity; GO:0016992 lipoate synthase activity;	PF04055	PF04055 Radical SAM superfamily	H	KOG2672	Lipoate synthase				R-MMU-1430728 Metabolism;R-MMU-389661 Glyoxylate metabolism and glycine degradation;R-MMU-71291 Metabolism of amino acids and derivatives	https://reactome.org/PathwayBrowser/#/R-MMU-1430728;https://reactome.org/PathwayBrowser/#/R-MMU-389661;https://reactome.org/PathwayBrowser/#/R-MMU-71291
Q9CQR7	Gamma-secretase subunit PEN-2 OS=Mus musculus OX=10090 GN=Psenen PE=1 SV=1	Psenen	1.84162	0.0783539	Up	14.85	1	1	1	1631.24	1868.77	2837.68	3632.24	0.729217	0.8354	1.26853	1.62373	plasma membrane	K06170	PSENEN; presenilin enhancer 2	mmu04330 Notch signaling pathway; mmu05010 Alzheimer disease	GO:0000003 reproduction; GO:0001667 ameboidal-type cell migration; GO:0003006 developmental process involved in reproduction; GO:0006508 proteolysis; GO:0006509 membrane protein ectodomain proteolysis; GO:0006518 peptide metabolic process; GO:0006807 nitrogen compound metabolic process; GO:0006928 movement of cell or subcellular component; GO:0007154 cell communication; GO:0007165 signal transduc…	GO:0005622 intracellular anatomical structure; GO:0005737 cytoplasm; GO:0005768 endosome; GO:0005770 late endosome; GO:0005783 endoplasmic reticulum; GO:0005794 Golgi apparatus; GO:0005886 plasma membrane; GO:0005887 integral component of plasma membrane; GO:0012505 endomembrane system; GO:0016020 membrane; GO:0016021 integral component of membrane; GO:0031224 intrinsic component of membrane; GO:…				S	KOG3402	Predicted membrane protein	WP265 Delta-Notch signaling pathway;WP2075 Alzheimer's disease	http://www.wikipathways.org/instance/WP265_r117870;http://www.wikipathways.org/instance/WP2075_r116517		R-MMU-1236394 Signaling by ERBB4;R-MMU-1251985 Nuclear signaling by ERBB4;R-MMU-1266738 Developmental Biology;R-MMU-157118 Signaling by NOTCH;R-MMU-162582 Signal Transduction;R-MMU-193692 Regulated proteolysis of p75NTR;R-MMU-193704 p75 NTR receptor-mediated signalling;R-MMU-204998 Cell death signalling via NRAGE, NRIF and NADE;R-MMU-205043 NRIF signals cell death from the nucleus;R-MMU-2682334 E…	https://reactome.org/PathwayBrowser/#/R-MMU-1236394;https://reactome.org/PathwayBrowser/#/R-MMU-1251985;https://reactome.org/PathwayBrowser/#/R-MMU-1266738;https://reactome.org/PathwayBrowser/#/R-MMU-157118;https://reactome.org/PathwayBrowser/#/R-MMU-162582;https://reactome.org/PathwayBrowser/#/R-MMU-193692;https://reactome.org/PathwayBrowser/#/R-MMU-193704;https://reactome.org/PathwayBrowser/#/R…	HALLMARK NOTCH SIGNALING	http://www.gsea-msigdb.org/gsea/msigdb/mouse/geneset/HALLMARK_NOTCH_SIGNALING
Q9ERD7	Tubulin beta-3 chain OS=Mus musculus OX=10090 GN=Tubb3 PE=1 SV=1	Tubb3	0.649378	0.059535	Down	37.78	16	3	3	6079.2	3900.16	4113.89	2426.06	1.18775	0.76201	0.803769	0.474002	cytoplasm	K07375	TUBB; tubulin beta	mmu05020 Prion disease; mmu05016 Huntington disease; mmu05132 Salmonella infection; mmu05014 Amyotrophic lateral sclerosis; mmu05010 Alzheimer disease; mmu04540 Gap junction; mmu05022 Pathways of neurodegeneration - multiple diseases; mmu04145 Phagosome; mmu05012 Parkinson disease	GO:0000278 mitotic cell cycle; GO:0000902 cell morphogenesis; GO:0000904 cell morphogenesis involved in differentiation; GO:0006928 movement of cell or subcellular component; GO:0006935 chemotaxis; GO:0006996 organelle organization; GO:0007010 cytoskeleton organization; GO:0007049 cell cycle; GO:0007275 multicellular organism development; GO:0007399 nervous system development; GO:0007409 axonogen…	GO:0005622 intracellular anatomical structure; GO:0005737 cytoplasm; GO:0005856 cytoskeleton; GO:0005874 microtubule; GO:0005886 plasma membrane; GO:0015630 microtubule cytoskeleton; GO:0016020 membrane; GO:0030424 axon; GO:0030425 dendrite; GO:0036477 somatodendritic compartment; GO:0042995 cell projection; GO:0043005 neuron projection; GO:0043025 neuronal cell body; GO:0043226 organelle; GO:004…	GO:0005198 structural molecule activity; GO:0005200 structural constituent of cytoskeleton; GO:0005488 binding; GO:0033218 amide binding; GO:0042277 peptide binding;	PF00091; PF03953	PF00091 Tubulin/FtsZ family, GTPase domain; PF03953 Tubulin C-terminal domain	Z	KOG1375	Beta tubulin				R-MMU-109582 Hemostasis;R-MMU-1266738 Developmental Biology;R-MMU-1280218 Adaptive Immune System;R-MMU-157858 Gap junction trafficking and regulation;R-MMU-162582 Signal Transduction;R-MMU-1632852 Macroautophagy;R-MMU-1640170 Cell Cycle;R-MMU-168256 Immune System;R-MMU-1852241 Organelle biogenesis and maintenance;R-MMU-190828 Gap junction trafficking;R-MMU-190840 Microtubule-dependent trafficking…
Q9JL19	Nuclear receptor coactivator 6 OS=Mus musculus OX=10090 GN=Ncoa6 PE=1 SV=1	Ncoa6	1.79228	0.0938033	Up	0.63	1	1	1	644.316	483.712	1231.39	809.443	0.813309	0.610582	1.55436	1.02175	nucleus	K14971			GO:0000003 reproduction; GO:0001541 ovarian follicle development; GO:0001568 blood vessel development; GO:0001701 in utero embryonic development; GO:0001890 placenta development; GO:0001892 embryonic placenta development; GO:0001944 vasculature development; GO:0002376 immune system process; GO:0002520 immune system development; GO:0002791 regulation of peptide secretion; GO:0002793 positive regul…	GO:0005622 intracellular anatomical structure; GO:0005634 nucleus; GO:0005654 nucleoplasm; GO:0005667 transcription regulator complex; GO:0005737 cytoplasm; GO:0005829 cytosol; GO:0031974 membrane-enclosed lumen; GO:0031981 nuclear lumen; GO:0032991 protein-containing complex; GO:0034708 methyltransferase complex; GO:0035097 histone methyltransferase complex; GO:0043226 organelle; GO:0043227 memb…	GO:0003682 chromatin binding; GO:0003712 transcription coregulator activity; GO:0003713 transcription coactivator activity; GO:0005102 signaling receptor binding; GO:0005488 binding; GO:0005515 protein binding; GO:0008134 transcription factor binding; GO:0016922 nuclear receptor binding; GO:0019899 enzyme binding; GO:0019904 protein domain specific binding; GO:0030331 estrogen receptor binding; G…								Transcription factor	R-MMU-1430728 Metabolism;R-MMU-2262752 Cellular responses to stress;R-MMU-400206 Regulation of lipid metabolism by PPARalpha;R-MMU-556833 Metabolism of lipids;R-MMU-8953897 Cellular responses to stimuli;R-MMU-9707564 Cytoprotection by HMOX1;R-MMU-9711123 Cellular response to chemical stress	https://reactome.org/PathwayBrowser/#/R-MMU-1430728;https://reactome.org/PathwayBrowser/#/R-MMU-2262752;https://reactome.org/PathwayBrowser/#/R-MMU-400206;https://reactome.org/PathwayBrowser/#/R-MMU-556833;https://reactome.org/PathwayBrowser/#/R-MMU-8953897;https://reactome.org/PathwayBrowser/#/R-MMU-9707564;https://reactome.org/PathwayBrowser/#/R-MMU-9711123
Q9JL35	High mobility group nucleosome-binding domain-containing protein 5 OS=Mus musculus OX=10090 GN=Hmgn5 PE=1 SV=2	Hmgn5	0.581232	0.0678889	Down	3.45	1	1	1	965.54	1258.69	588.143	696.471	1.03493	1.34915	0.63041	0.746523	nucleus	K17045			GO:0006325 chromatin organization; GO:0006355 regulation of transcription, DNA-templated; GO:0006357 regulation of transcription by RNA polymerase II; GO:0006518 peptide metabolic process; GO:0006575 cellular modified amino acid metabolic process; GO:0006749 glutathione metabolic process; GO:0006790 sulfur compound metabolic process; GO:0006807 nitrogen compound metabolic process; GO:0006996 orga…	GO:0005622 intracellular anatomical structure; GO:0005634 nucleus; GO:0005654 nucleoplasm; GO:0031974 membrane-enclosed lumen; GO:0031981 nuclear lumen; GO:0043226 organelle; GO:0043227 membrane-bounded organelle; GO:0043229 intracellular organelle; GO:0043231 intracellular membrane-bounded organelle; GO:0043233 organelle lumen; GO:0070013 intracellular organelle lumen;	GO:0003682 chromatin binding; GO:0005488 binding;
Q64695	Endothelial protein C receptor OS=Mus musculus OX=10090 GN=Procr PE=1 SV=3	Procr	1.73115	0.0737009	Up	5.37	1	1	1	1989.34	6382	3623.31	10472.4	0.366795	1.17671	0.668066	1.9309	extracellular	K06557	PROCR; protein C receptor, endothelial (EPCR)	mmu04610 Complement and coagulation cascades	GO:0006950 response to stress; GO:0007154 cell communication; GO:0007165 signal transduction; GO:0007596 blood coagulation; GO:0007599 hemostasis; GO:0009611 response to wounding; GO:0009987 cellular process; GO:0023052 signaling; GO:0032501 multicellular organismal process; GO:0042060 wound healing; GO:0048519 negative regulation of biological process; GO:0050789 regulation of biological process…	GO:0005576 extracellular region; GO:0005615 extracellular space; GO:0005622 intracellular anatomical structure; GO:0005737 cytoplasm; GO:0005813 centrosome; GO:0005815 microtubule organizing center; GO:0005856 cytoskeleton; GO:0005886 plasma membrane; GO:0005887 integral component of plasma membrane; GO:0015630 microtubule cytoskeleton; GO:0016020 membrane; GO:0016021 integral component of membra…	GO:0005488 binding; GO:0005515 protein binding; GO:0008022 protein C-terminus binding; GO:0038023 signaling receptor activity; GO:0060089 molecular transducer activity;	PF16497	PF16497 MHC-I family domain							R-MMU-109582 Hemostasis;R-MMU-140875 Common Pathway of Fibrin Clot Formation;R-MMU-140877 Formation of Fibrin Clot (Clotting Cascade);R-MMU-202733 Cell surface interactions at the vascular wall	https://reactome.org/PathwayBrowser/#/R-MMU-109582;https://reactome.org/PathwayBrowser/#/R-MMU-140875;https://reactome.org/PathwayBrowser/#/R-MMU-140877;https://reactome.org/PathwayBrowser/#/R-MMU-202733	HALLMARK INTERFERON ALPHA RESPONSE;HALLMARK P53 PATHWAY	http://www.gsea-msigdb.org/gsea/msigdb/mouse/geneset/HALLMARK_INTERFERON_ALPHA_RESPONSE;http://www.gsea-msigdb.org/gsea/msigdb/mouse/geneset/HALLMARK_P53_PATHWAY
Q6ZQA0	Neurobeachin-like protein 2 OS=Mus musculus OX=10090 GN=Nbeal2 PE=1 SV=2	Nbeal2	0.63893	0.0789595	Down	1.64	4	4	4	1342.37	2036.1	809.794	1373.56	0.912328	1.38381	0.550368	0.933526	plasma membrane	K23286			GO:0000902 cell morphogenesis; GO:0000904 cell morphogenesis involved in differentiation; GO:0001501 skeletal system development; GO:0001775 cell activation; GO:0002252 immune effector process; GO:0002263 cell activation involved in immune response; GO:0002274 myeloid leukocyte activation; GO:0002275 myeloid cell activation involved in immune response; GO:0002283 neutrophil activation involved in…	GO:0005622 intracellular anatomical structure; GO:0005737 cytoplasm; GO:0005783 endoplasmic reticulum; GO:0005886 plasma membrane; GO:0012505 endomembrane system; GO:0012506 vesicle membrane; GO:0016020 membrane; GO:0030141 secretory granule; GO:0030659 cytoplasmic vesicle membrane; GO:0030667 secretory granule membrane; GO:0031090 organelle membrane; GO:0031410 cytoplasmic vesicle; GO:0031982 ve…		PF14844	PF14844 PH domain associated with Beige/BEACH	U	KOG1787	Kinase A-anchor protein Neurobeachin and related BEACH and WD40 repeat proteins				R-MMU-168249 Innate Immune System;R-MMU-168256 Immune System;R-MMU-6798695 Neutrophil degranulation	https://reactome.org/PathwayBrowser/#/R-MMU-168249;https://reactome.org/PathwayBrowser/#/R-MMU-168256;https://reactome.org/PathwayBrowser/#/R-MMU-6798695
Q7TS72	Inositol-trisphosphate 3-kinase C OS=Mus musculus OX=10090 GN=Itpkc PE=1 SV=1	Itpkc	1.6149	0.0564341	Up	3.98	2	2	2	1532.3	1234.79	2375.76	2073.63	0.914382	0.736847	1.41771	1.23741	nucleus	K00911	ITPK; 1D-myo-inositol-triphosphate 3-kinase [EC:2.7.1.127]	mmu04020 Calcium signaling pathway; mmu04070 Phosphatidylinositol signaling system; mmu01100 Metabolic pathways; mmu00562 Inositol phosphate metabolism	GO:0002165 instar larval or pupal development; GO:0005975 carbohydrate metabolic process; GO:0006020 inositol metabolic process; GO:0006066 alcohol metabolic process; GO:0006464 cellular protein modification process; GO:0006468 protein phosphorylation; GO:0006793 phosphorus metabolic process; GO:0006796 phosphate-containing compound metabolic process; GO:0006807 nitrogen compound metabolic proces…	GO:0005622 intracellular anatomical structure; GO:0005634 nucleus; GO:0005654 nucleoplasm; GO:0005737 cytoplasm; GO:0005829 cytosol; GO:0016604 nuclear body; GO:0016607 nuclear speck; GO:0030425 dendrite; GO:0031974 membrane-enclosed lumen; GO:0031981 nuclear lumen; GO:0036477 somatodendritic compartment; GO:0042995 cell projection; GO:0043005 neuron projection; GO:0043197 dendritic spine; GO:004…	GO:0003824 catalytic activity; GO:0004672 protein kinase activity; GO:0004674 protein serine/threonine kinase activity; GO:0004683 calmodulin-dependent protein kinase activity; GO:0005488 binding; GO:0005515 protein binding; GO:0005516 calmodulin binding; GO:0008440 inositol-1,4,5-trisphosphate 3-kinase activity; GO:0016301 kinase activity; GO:0016740 transferase activity; GO:0016772 transferase …			I	KOG1621	1D-myo-inositol-triphosphate 3-kinase A				R-MMU-1430728 Metabolism;R-MMU-1483249 Inositol phosphate metabolism;R-MMU-1855204 Synthesis of IP3 and IP4 in the cytosol	https://reactome.org/PathwayBrowser/#/R-MMU-1430728;https://reactome.org/PathwayBrowser/#/R-MMU-1483249;https://reactome.org/PathwayBrowser/#/R-MMU-1855204
Q8JZM0	Dimethyladenosine transferase 1, mitochondrial OS=Mus musculus OX=10090 GN=Tfb1m PE=1 SV=1	Tfb1m	0.601762	0.0251623	Down	2.32	1	1	1	6380.94	5659.24	3771.49	3466.11	1.32717	1.17706	0.784431	0.720915	cytoplasm	K15266			GO:0000154 rRNA modification; GO:0000959 mitochondrial RNA metabolic process; GO:0001510 RNA methylation; GO:0006139 nucleobase-containing compound metabolic process; GO:0006351 transcription, DNA-templated; GO:0006364 rRNA processing; GO:0006390 mitochondrial transcription; GO:0006396 RNA processing; GO:0006417 regulation of translation; GO:0006725 cellular aromatic compound metabolic process; G…	GO:0005622 intracellular anatomical structure; GO:0005737 cytoplasm; GO:0005739 mitochondrion; GO:0005759 mitochondrial matrix; GO:0009295 nucleoid; GO:0031974 membrane-enclosed lumen; GO:0042645 mitochondrial nucleoid; GO:0043226 organelle; GO:0043227 membrane-bounded organelle; GO:0043228 non-membrane-bounded organelle; GO:0043229 intracellular organelle; GO:0043231 intracellular membrane-bound…	GO:0000179 rRNA (adenine-N6,N6-)-dimethyltransferase activity; GO:0003712 transcription coregulator activity; GO:0003824 catalytic activity; GO:0008168 methyltransferase activity; GO:0008170 N-methyltransferase activity; GO:0008173 RNA methyltransferase activity; GO:0008649 rRNA methyltransferase activity; GO:0008757 S-adenosylmethionine-dependent methyltransferase activity; GO:0016433 rRNA (aden…	PF00398	PF00398 Ribosomal RNA adenine dimethylase	A	KOG0821	Predicted ribosomal RNA adenine dimethylase	WP1263 Mitochondrial gene expression	http://www.wikipathways.org/instance/WP1263_r117918
Q8R143	Pituitary tumor-transforming gene 1 protein-interacting protein OS=Mus musculus OX=10090 GN=Pttg1ip PE=1 SV=1	Pttg1ip	1.63056	0.0108817	Up	10.34	3	3	3	47875.7	71189.4	77463.7	116972	0.663636	0.986802	1.07377	1.62142	extracellular	K26099			GO:0006606 protein import into nucleus; GO:0006810 transport; GO:0006886 intracellular protein transport; GO:0006913 nucleocytoplasmic transport; GO:0008104 protein localization; GO:0009893 positive regulation of metabolic process; GO:0009894 regulation of catabolic process; GO:0009896 positive regulation of catabolic process; GO:0009966 regulation of signal transduction; GO:0009968 negative regu…	GO:0005622 intracellular anatomical structure; GO:0005634 nucleus; GO:0005654 nucleoplasm; GO:0005737 cytoplasm; GO:0031974 membrane-enclosed lumen; GO:0031981 nuclear lumen; GO:0043226 organelle; GO:0043227 membrane-bounded organelle; GO:0043229 intracellular organelle; GO:0043231 intracellular membrane-bounded organelle; GO:0043233 organelle lumen; GO:0070013 intracellular organelle lumen;	GO:0002039 p53 binding; GO:0005488 binding; GO:0005515 protein binding;
Q9D8Y7	Tumor necrosis factor alpha-induced protein 8-like protein 2 OS=Mus musculus OX=10090 GN=Tnfaip8l2 PE=1 SV=1	Tnfaip8l2	0.639254	0.0310592	Down	15.22	2	2	2	7216.99	9439.23	4512.17	6166.59	1.08132	1.41428	0.676058	0.923939	cytoplasm				GO:0002682 regulation of immune system process; GO:0002683 negative regulation of immune system process; GO:0002694 regulation of leukocyte activation; GO:0002695 negative regulation of leukocyte activation; GO:0007162 negative regulation of cell adhesion; GO:0022407 regulation of cell-cell adhesion; GO:0022408 negative regulation of cell-cell adhesion; GO:0030155 regulation of cell adhesion; GO:…	GO:0005622 intracellular anatomical structure; GO:0005737 cytoplasm;										R-MMU-1430728 Metabolism;R-MMU-1483255 PI Metabolism;R-MMU-1483257 Phospholipid metabolism;R-MMU-556833 Metabolism of lipids	https://reactome.org/PathwayBrowser/#/R-MMU-1430728;https://reactome.org/PathwayBrowser/#/R-MMU-1483255;https://reactome.org/PathwayBrowser/#/R-MMU-1483257;https://reactome.org/PathwayBrowser/#/R-MMU-556833
Q9R1Q6	Transmembrane protein 176B OS=Mus musculus OX=10090 GN=Tmem176b PE=1 SV=1	Tmem176b	1.54384	0.0549518	Up	17.87	4	4	4	11790	21774.6	18909.1	32310.2	0.554052	1.02326	0.888603	1.51837	plasma membrane				GO:0002682 regulation of immune system process; GO:0002683 negative regulation of immune system process; GO:0007275 multicellular organism development; GO:0009653 anatomical structure morphogenesis; GO:0009887 animal organ morphogenesis; GO:0032501 multicellular organismal process; GO:0032502 developmental process; GO:0045595 regulation of cell differentiation; GO:0045596 negative regulation of c…													HALLMARK XENOBIOTIC METABOLISM;HALLMARK KRAS SIGNALING UP	http://www.gsea-msigdb.org/gsea/msigdb/mouse/geneset/HALLMARK_XENOBIOTIC_METABOLISM;http://www.gsea-msigdb.org/gsea/msigdb/mouse/geneset/HALLMARK_KRAS_SIGNALING_UP
Q3UX43	Ankyrin repeat domain-containing protein 13C OS=Mus musculus OX=10090 GN=Ankrd13c PE=1 SV=2	Ankrd13c	1.51867	0.0749257	Up	4.62	2	2	2	1097.89	1245.13	1755.67	1790.76	0.830483	0.94186	1.32805	1.35459	nucleus	K21437			GO:0006621 protein retention in ER lumen; GO:0008104 protein localization; GO:0009889 regulation of biosynthetic process; GO:0009987 cellular process; GO:0010556 regulation of macromolecule biosynthetic process; GO:0010941 regulation of cell death; GO:0019222 regulation of metabolic process; GO:0031323 regulation of cellular metabolic process; GO:0032507 maintenance of protein location in cell; G…	GO:0005622 intracellular anatomical structure; GO:0005737 cytoplasm; GO:0005783 endoplasmic reticulum; GO:0012505 endomembrane system; GO:0043226 organelle; GO:0043227 membrane-bounded organelle; GO:0043229 intracellular organelle; GO:0043231 intracellular membrane-bounded organelle; GO:0048471 perinuclear region of cytoplasm;	GO:0005102 signaling receptor binding; GO:0005488 binding; GO:0005515 protein binding;	PF11904	PF11904 GPCR-chaperone	R	KOG0522	Ankyrin repeat protein
Q6IFX2	Keratin, type I cytoskeletal 42 OS=Mus musculus OX=10090 GN=Krt42 PE=1 SV=1	Krt42	2.17733	0.00139947	Up	7.74	4	3	3	14847.9	15220	32360.8	33106.2	0.664664	0.681321	1.44863	1.48199	mitochondria	K07604	KRT1; type I keratin, acidic	mmu05150 Staphylococcus aureus infection; mmu04915 Estrogen signaling pathway	GO:0000003 reproduction; GO:0001558 regulation of cell growth; GO:0001654 eye development; GO:0001667 ameboidal-type cell migration; GO:0001942 hair follicle development; GO:0002009 morphogenesis of an epithelium; GO:0002064 epithelial cell development; GO:0002376 immune system process; GO:0003334 keratinocyte development; GO:0006417 regulation of translation; GO:0006928 movement of cell or subce…	GO:0005576 extracellular region; GO:0005615 extracellular space; GO:0005622 intracellular anatomical structure; GO:0005737 cytoplasm; GO:0005856 cytoskeleton; GO:0005882 intermediate filament; GO:0031982 vesicle; GO:0043226 organelle; GO:0043227 membrane-bounded organelle; GO:0043228 non-membrane-bounded organelle; GO:0043229 intracellular organelle; GO:0043230 extracellular organelle; GO:0043232…	GO:0004888 transmembrane signaling receptor activity; GO:0005102 signaling receptor binding; GO:0005198 structural molecule activity; GO:0005200 structural constituent of cytoskeleton; GO:0005488 binding; GO:0005515 protein binding; GO:0008092 cytoskeletal protein binding; GO:0032395 MHC class II receptor activity; GO:0038023 signaling receptor activity; GO:0042287 MHC protein binding; GO:0042289…
Q99LH9	SH3 domain-binding protein 5-like OS=Mus musculus OX=10090 GN=Sh3bp5l PE=1 SV=1	Sh3bp5l	1.81056	0.0252548	Up	3.06	1	1	1	806.666	898.141	1486.6	1597.1	0.767766	0.854829	1.41491	1.52008	cytoplasm,nucleus	K23739			GO:0001932 regulation of protein phosphorylation; GO:0001933 negative regulation of protein phosphorylation; GO:0006469 negative regulation of protein kinase activity; GO:0007154 cell communication; GO:0007165 signal transduction; GO:0009892 negative regulation of metabolic process; GO:0009987 cellular process; GO:0010563 negative regulation of phosphorus metabolic process; GO:0010605 negative re…	GO:0005622 intracellular anatomical structure; GO:0005737 cytoplasm;	GO:0004857 enzyme inhibitor activity; GO:0004860 protein kinase inhibitor activity; GO:0005488 binding; GO:0005515 protein binding; GO:0017124 SH3 domain binding; GO:0019207 kinase regulator activity; GO:0019210 kinase inhibitor activity; GO:0019887 protein kinase regulator activity; GO:0019904 protein domain specific binding; GO:0030234 enzyme regulator activity; GO:0098772 molecular function re…			T	KOG2008	BTK-associated SH3-domain binding protein SAB
Q9D2Q2	Probable tRNA (uracil-O(2)-)-methyltransferase OS=Mus musculus OX=10090 GN=Trmt44 PE=2 SV=2	Trmt44	2.93169	0.0866013	Up	3.51	2	2	2	530.107	561.813	1458.94	1747.92	0.552629	0.585682	1.52092	1.82218	cytoplasm	K15447			GO:0001510 RNA methylation; GO:0006139 nucleobase-containing compound metabolic process; GO:0006396 RNA processing; GO:0006399 tRNA metabolic process; GO:0006400 tRNA modification; GO:0006725 cellular aromatic compound metabolic process; GO:0006807 nitrogen compound metabolic process; GO:0008033 tRNA processing; GO:0008152 metabolic process; GO:0009451 RNA modification; GO:0009987 cellular proces…		GO:0003824 catalytic activity; GO:0008168 methyltransferase activity; GO:0008173 RNA methyltransferase activity; GO:0008175 tRNA methyltransferase activity; GO:0016300 tRNA (uracil) methyltransferase activity; GO:0016740 transferase activity; GO:0016741 transferase activity, transferring one-carbon groups; GO:0140098 catalytic activity, acting on RNA; GO:0140101 catalytic activity, acting on a tR…			S	KOG3790	Uncharacterized conserved protein
Q3UGP9	Leucine-rich repeat-containing protein 58 OS=Mus musculus OX=10090 GN=Lrrc58 PE=2 SV=1	Lrrc58	0.647462	0.0218224	Down	18.03	5	5	5	2072.36	3216.3	1362.48	2050.3	0.895129	1.38924	0.588506	0.885601	nucleus									R	KOG0619	FOG: Leucine rich repeat
Q3UTD9	Small integral membrane protein 15 OS=Mus musculus OX=10090 GN=Smim15 PE=1 SV=1	Smim15	1.57775	0.0422022	Up	16.22	1	1	1	2024.87	1535.68	3099.4	2495.22	0.971027	0.736436	1.48632	1.19658	endoplasmic reticulum
Q80UN1	BTB/POZ domain-containing protein KCTD9 OS=Mus musculus OX=10090 GN=Kctd9 PE=2 SV=1	Kctd9	1.55687	0.0338303	Up	13.27	4	4	4	1761.12	1604.25	2676.24	2557.35	0.815973	0.743291	1.23997	1.18489	mitochondria	K21919					GO:0005488 binding; GO:0005515 protein binding; GO:0042802 identical protein binding; GO:0043621 protein self-association; GO:0097602 cullin family protein binding;	PF02214	PF02214 BTB/POZ domain	R	KOG1665	AFH1-interacting protein FIP2, contains BTB/POZ domain and pentapeptide repeats
Q8BK08	Transmembrane protein 11, mitochondrial OS=Mus musculus OX=10090 GN=Tmem11 PE=1 SV=1	Tmem11	1.58083	0.0408963	Up	12.63	2	2	2	1927.75	1974.66	3135.57	3031.33	0.711672	0.72899	1.15757	1.11908	cytoplasm				GO:0006091 generation of precursor metabolites and energy; GO:0006119 oxidative phosphorylation; GO:0006139 nucleobase-containing compound metabolic process; GO:0006163 purine nucleotide metabolic process; GO:0006725 cellular aromatic compound metabolic process; GO:0006753 nucleoside phosphate metabolic process; GO:0006793 phosphorus metabolic process; GO:0006796 phosphate-containing compound met…	GO:0005622 intracellular anatomical structure; GO:0005737 cytoplasm; GO:0005739 mitochondrion; GO:0005740 mitochondrial envelope; GO:0005743 mitochondrial inner membrane; GO:0005886 plasma membrane; GO:0005887 integral component of plasma membrane; GO:0016020 membrane; GO:0016021 integral component of membrane; GO:0019866 organelle inner membrane; GO:0031090 organelle membrane; GO:0031224 intrins…
Q8R3Q6	Protein MIX23 OS=Mus musculus OX=10090 GN=Mix23 PE=1 SV=1	Mix23	0.652436	0.0725633	Down	25.69	3	3	3	11371	11295.2	7038.19	7747.52	1.27744	1.26893	0.790686	0.870374	cytoplasm					GO:0005622 intracellular anatomical structure; GO:0005737 cytoplasm; GO:0005739 mitochondrion; GO:0043226 organelle; GO:0043227 membrane-bounded organelle; GO:0043229 intracellular organelle; GO:0043231 intracellular membrane-bounded organelle;				RD	KOG4613	Predicted component of DNA replication checkpoint response mechanism (S-M checkpoint)						HALLMARK FATTY ACID METABOLISM	http://www.gsea-msigdb.org/gsea/msigdb/mouse/geneset/HALLMARK_FATTY_ACID_METABOLISM

## Sheet: Table S2
Table S2. Relative abundances of bacterial genera in PBS, BLM, and BLM+lidocaine-treated mice
Taxon	Ctrl-1	Ctrl-2	Ctrl-3	Ctrl-4	Ctrl-5	BLM-1	BLM-2	BLM-3	BLM-4	BLM-5	BLM+Lido-1	BLM+Lido-2	BLM+Lido-3	BLM+Lido-4	BLM+Lido-5	BLM+Lido-6
d__Bacteria;p__Acidobacteriota;c__Terriglobia;o__Bryobacterales;f__Solibacteraceae;g__Candidatus Solibacter	0	0	0	0	0	0	0	0	0	0	0	0	0	0	0	0
d__Bacteria;p__Acidobacteriota;c__Thermoanaerobaculia;o__Thermoanaerobaculales;f__Thermoanaerobaculaceae;g__Thermoanaerobaculum	0	0	0	0	0	0	0	0	0	0	0.0016412349183818312	0	0	0	0	0
d__Bacteria;p__Acidobacteriota;c__Vicinamibacteria;o__Vicinamibacterales;f__Vicinamibacteraceae;g__Luteitalea	0	0	0	0	0	0	0	0	0	0	0	0	0	0	0	0
d__Bacteria;p__Actinomycetota;c__Acidimicrobiia;o__Acidimicrobiales;f__Acidimicrobiaceae;g__Acidimicrobium	0	0	0	0	0	0	0	0	0	0	0	0	0	0	0	0
d__Bacteria;p__Actinomycetota;c__Acidimicrobiia;o__Acidimicrobiales;f__Acidimicrobiaceae;g__Aciditerrimonas	0	0	0.001422843099210969	0	0	0	0	0	0	0	0	0	0	0	0	0
d__Bacteria;p__Actinomycetota;c__Acidimicrobiia;o__Acidimicrobiales;f__Acidimicrobiaceae;g__Ferrithrix	0	0	0	0	0	0	0	0	0	0	0	0	0	0	0	0
d__Bacteria;p__Actinomycetota;c__Actinomycetes;o__Actinomycetales;f__Actinomycetaceae;g__Actinomyces	0	0.0015527241174590127	0	0	0.002218735992828328	0.0003494484791394451	0	0	0	0	0	0	0	0	0	0
d__Bacteria;p__Actinomycetota;c__Actinomycetes;o__Bifidobacteriales;f__Bifidobacteriaceae;g__Bifidobacterium	0	0	0	0	0	1.5193412136497615e-05	0	0.00023880026745629954	0.00015844791464938998	4.999583368052662e-05	0	9.545855905305109e-05	0.00010467915837956663	0	0	6.978854072161351e-05
d__Bacteria;p__Actinomycetota;c__Actinomycetes;o__Geodermatophilales;f__Geodermatophilaceae;g__Blastococcus	0	0	0	0	0	0	0	0	0	0	0	0	0	0	0	0
d__Bacteria;p__Actinomycetota;c__Actinomycetes;o__Geodermatophilales;f__Geodermatophilaceae;g__Modestobacter	0	0	0	0	0	0.0003342550670029475	0	0	0	0	0	0	0	0	0	0
d__Bacteria;p__Actinomycetota;c__Actinomycetes;o__Kitasatosporales;f__Streptomycetaceae;g__Streptomyces	0	0	0	6.732193348592971e-05	0	0	0	0	0	0	0	0	0	0	0	0
d__Bacteria;p__Actinomycetota;c__Actinomycetes;o__Micrococcales;f__Brevibacteriaceae;g__Brevibacterium	0	9.133671279170662e-05	0	0	6.723442402510085e-05	0	0	0	0	0	0	0	0	0	0	0
d__Bacteria;p__Actinomycetota;c__Actinomycetes;o__Micrococcales;f__Cellulomonadaceae;g__Actinotalea	0	0	0	0	0.00031376064545047064	0	0	0	0	0	0	0	0	0	0	0
d__Bacteria;p__Actinomycetota;c__Actinomycetes;o__Micrococcales;f__Cellulomonadaceae;g__Cellulomonas	0	0	0	0	0	0	0	0	0	0	0	0	0	0	0	0
d__Bacteria;p__Actinomycetota;c__Actinomycetes;o__Micrococcales;f__Dermabacteraceae;g__Brachybacterium	0	0	0	0	0	0	0	0	0	0.0019498375135405383	0	2.3864639763262773e-05	0	0	8.027937221530928e-05	0
d__Bacteria;p__Actinomycetota;c__Actinomycetes;o__Micrococcales;f__Intrasporangiaceae;g__Janibacter	0	0	0	0	0	0	0	0	0	0	0	0	0	0	0	0
d__Bacteria;p__Actinomycetota;c__Actinomycetes;o__Micrococcales;f__Jonesiaceae;g__Flavimobilis	0	0	0	0	0	0.002370172293293628	0	0	0.0004929490677981021	0	0	0.0010261795098202994	0	0	0	0
d__Bacteria;p__Actinomycetota;c__Actinomycetes;o__Micrococcales;f__Microbacteriaceae;g__Agromyces	0	0	0	0	0.0033617212012550424	0	0	0	0	0	0	0	0	0	0	0
d__Bacteria;p__Actinomycetota;c__Actinomycetes;o__Micrococcales;f__Microbacteriaceae;g__Curtobacterium	0	0.003744805224459972	8.623291510369507e-05	0	0	0	0	0	0	0	0	0	0	0	0	0
d__Bacteria;p__Actinomycetota;c__Actinomycetes;o__Micrococcales;f__Microbacteriaceae;g__Leifsonia	0	0	0	0	8.964589870013447e-05	0	0	0	0	0	0	0	0	0	0	0
d__Bacteria;p__Actinomycetota;c__Actinomycetes;o__Micrococcales;f__Microbacteriaceae;g__Microbacterium	0	0.001918070968625839	0.012848704350450565	0	0.002465262214253698	0	0	0	0	0	0	0	0	0	0	0
d__Bacteria;p__Actinomycetota;c__Actinomycetes;o__Micrococcales;f__Micrococcaceae;g__Arthrobacter	0	0	8.623291510369507e-05	0.000235626767200754	0.0004258180188256387	0.001093925673827828	0	0	0	0.0010165819515040413	0	0	0.001360829058934366	0	0	0
d__Bacteria;p__Actinomycetota;c__Actinomycetes;o__Micrococcales;f__Micrococcaceae;g__Citricoccus	0	0	0	0	0	0	0	0	0	0	0	0	0	0	0	0
d__Bacteria;p__Actinomycetota;c__Actinomycetes;o__Micrococcales;f__Micrococcaceae;g__Glutamicibacter	0	0	0	0.0001683048337148243	0	0	0	0	0	0	0	0	0	0	0	0
d__Bacteria;p__Actinomycetota;c__Actinomycetes;o__Micrococcales;f__Micrococcaceae;g__Kocuria	0	0	0	0	0	0	0	0	0	0	0	0	0	0	0	0
d__Bacteria;p__Actinomycetota;c__Actinomycetes;o__Micrococcales;f__Micrococcaceae;g__Micrococcus	0	0	0	0	0	0	0	0	0	0	0	0	0	0	0	0
d__Bacteria;p__Actinomycetota;c__Actinomycetes;o__Micrococcales;f__Micrococcaceae;g__Neomicrococcus	0	0	0	0	0	0	0	0	0	0	0	0	0	0	0	0
d__Bacteria;p__Actinomycetota;c__Actinomycetes;o__Micrococcales;f__Micrococcaceae;g__Nesterenkonia	0	0	8.623291510369507e-05	0	0	0	0	0	0	0	0	0	0	0	0	0
d__Bacteria;p__Actinomycetota;c__Actinomycetes;o__Micrococcales;f__Micrococcaceae;g__Pseudarthrobacter	0	0	0	0.00817961491854046	0.002465262214253698	0	0	0	0	0	0	0	0	0	0	0
d__Bacteria;p__Actinomycetota;c__Actinomycetes;o__Micrococcales;f__Micrococcaceae;g__Rothia	0	0	0	0	4.482294935006723e-05	0	0	0	0	0	0	0	0	0	0	0
d__Bacteria;p__Actinomycetota;c__Actinomycetes;o__Micrococcales;f__Micrococcaceae;g__Sinomonas	0	0	0	0	4.482294935006723e-05	0	0	0	0	0	0	0	0	0	0	0
d__Bacteria;p__Actinomycetota;c__Actinomycetes;o__Micrococcales;f__Ornithinimicrobiaceae;g__Ornithinimicrobium	0	0	0	0	0	0	0	0	0	0	0	0	0	0	0	0
d__Bacteria;p__Actinomycetota;c__Actinomycetes;o__Micrococcales;f__Promicromonosporaceae;g__Cellulosimicrobium	0	0	0	0	0	0	0	0	0	0	0	0	0	0	0	0
d__Bacteria;p__Actinomycetota;c__Actinomycetes;o__Micrococcales;f__Promicromonosporaceae;g__Isoptericola	0	0	0	0.00010098290022889458	0	0	0	0	0	0	0	0	0	0	0	0
d__Bacteria;p__Actinomycetota;c__Actinomycetes;o__Micrococcales;f__Promicromonosporaceae;g__Promicromonospora	0	0	0	0	0	0	0	0	0	0	0	0	0	0	0	0
d__Bacteria;p__Actinomycetota;c__Actinomycetes;o__Micrococcales;f__Sanguibacteraceae;g__Sanguibacter	0	0	0	0	0	0	0	0	0	0	0	0	0	0	0	0
d__Bacteria;p__Actinomycetota;c__Actinomycetes;o__Micromonosporales;f__Micromonosporaceae;g__Actinoplanes	0	0	0	0	0	0	0	0	0	0	0	0	0	0	0	0
d__Bacteria;p__Actinomycetota;c__Actinomycetes;o__Micromonosporales;f__Micromonosporaceae;g__Micromonospora	0	0	0.00017246583020739015	0	0	0	0	0	0	0	0	0	0	0	0	0
d__Bacteria;p__Actinomycetota;c__Actinomycetes;o__Mycobacteriales;f__Corynebacteriaceae;g__Corynebacterium	0	0	0	0	0	0	0	0	0	0	0	0	0	0	0	0.0003140484332472608
d__Bacteria;p__Actinomycetota;c__Actinomycetes;o__Mycobacteriales;f__Gordoniaceae;g__Gordonia	0	0	0	0	0	0	0	0	0	0	0	0	0	0	0	0
d__Bacteria;p__Actinomycetota;c__Actinomycetes;o__Mycobacteriales;f__Mycobacteriaceae;g__Mycobacterium	0	0	0	0	0	0	0	0	0	0	0	0	0	0	0	0
d__Bacteria;p__Actinomycetota;c__Actinomycetes;o__Mycobacteriales;f__Nocardiaceae;g__Nocardia	0	0	0	0	0	0	0	0	0	0	0	0	0	0	0	0
d__Bacteria;p__Actinomycetota;c__Actinomycetes;o__Mycobacteriales;f__Nocardiaceae;g__Rhodococcus	0	0	0	0.0076073784839100584	0.00022411474675033616	0	0	0	0	0	0	0	0	0	0	0
d__Bacteria;p__Actinomycetota;c__Actinomycetes;o__Propionibacteriales;f__Nocardioidaceae;g__Aeromicrobium	0	0	0	0	0.0006275212909009413	0	0	0	0	0	0	0	0	0	0	0
d__Bacteria;p__Actinomycetota;c__Actinomycetes;o__Propionibacteriales;f__Nocardioidaceae;g__Marmoricola	0	0	0	0	4.482294935006723e-05	0.0008052508432343736	0	0.00021492024071066959	0	0	0	0	0	0	0	0
d__Bacteria;p__Actinomycetota;c__Actinomycetes;o__Propionibacteriales;f__Nocardioidaceae;g__Nocardioides	0	9.133671279170662e-05	0	0	0	3.038682427299523e-05	0	0	0	0	0	0	0	0	0	0
d__Bacteria;p__Actinomycetota;c__Actinomycetes;o__Propionibacteriales;f__Nocardioidaceae;g__Thermasporomyces	0	0	0	0	0	0	0	0	0	0	0	0	0	0	0	0
d__Bacteria;p__Actinomycetota;c__Actinomycetes;o__Propionibacteriales;f__Propionibacteriaceae;g__Cutibacterium	0	0.004064483719230945	0	0	0.0005378753922008068	4.558023640949285e-05	0	0	0	0	0	0	0	0.0005888214512184075	0	0.00010468281108242027
d__Bacteria;p__Actinomycetota;c__Actinomycetes;o__Propionibacteriales;f__Propionibacteriaceae;g__Propionibacterium	0	0	0	0	0.00015688032272523532	0	0	0	0	0	0	0	0	0	0	0
d__Bacteria;p__Actinomycetota;c__Actinomycetes;o__Pseudonocardiales;f__Pseudonocardiaceae;g__Actinomycetospora	0	0	0	0	0	0	0	0	0	0	0	0	0	0	0	0
d__Bacteria;p__Actinomycetota;c__Actinomycetes;o__Pseudonocardiales;f__Pseudonocardiaceae;g__Amycolatopsis	0	0	0	0	0.00011205737337516809	0	0	0	0	0	0	0	0	0	0	0
d__Bacteria;p__Actinomycetota;c__Actinomycetes;o__Pseudonocardiales;f__Pseudonocardiaceae;g__Pseudonocardia	0	0.0016440608302507194	0	0	0	0	0	0	0	0	0	0	0	0	0	0
d__Bacteria;p__Actinomycetota;c__Actinomycetes;o__Pseudonocardiales;f__Pseudonocardiaceae;g__Saccharopolyspora	0	0	0	0	0	0.0012762466194657996	0	0	0	0	0	0	0	0	0	0
d__Bacteria;p__Actinomycetota;c__Actinomycetes;o__Pseudonocardiales;f__Pseudonocardiaceae;g__Saccharothrix	0	0	0	0.00010098290022889458	0	0	0	0	0	0	0	0	0	0	0	0
d__Bacteria;p__Actinomycetota;c__Actinomycetes;o__Streptosporangiales;f__Nocardiopsaceae;g__Nocardiopsis	0	0	0.003837364722114431	0	0	0.0003342550670029475	0	0	0	0	0	0	0	0	0	0
d__Bacteria;p__Actinomycetota;c__Actinomycetes;o__Streptosporangiales;f__Streptosporangiaceae;g__Nonomuraea	0	0	0	0	0	0	0	0	0	0	0	0	0	0	0	0
d__Bacteria;p__Actinomycetota;c__Actinomycetes;o__Streptosporangiales;f__Thermomonosporaceae;g__Thermomonospora	0	0	0	0	0	0	0	0	0	0	0	0	0	0	0	0
d__Bacteria;p__Actinomycetota;c__Coriobacteriia;o__Coriobacteriales;f__Coriobacteriaceae;g__Collinsella	0	0	0	0	0	0	0	0	0	0	0	0	0.00010467915837956663	9.058791557206268e-05	0	0
d__Bacteria;p__Actinomycetota;c__Coriobacteriia;o__Coriobacteriales;f__Coriobacteriaceae;g__Coriobacterium	0	0	0	0	0	0	0	0	0	0	0	0	0	0	0	0
d__Bacteria;p__Actinomycetota;c__Coriobacteriia;o__Coriobacteriales;f__Coriobacteriaceae;g__Parvibacter	0	0	0	0	0	0	0	0	0	0	0	0	0	0	0	0
d__Bacteria;p__Actinomycetota;c__Coriobacteriia;o__Eggerthellales;f__Eggerthellaceae;g__Adlercreutzia	0	0	0	0	0	0	0	0	0	0	0	0	0	0	0	0
d__Bacteria;p__Actinomycetota;c__Coriobacteriia;o__Eggerthellales;f__Eggerthellaceae;g__Eggerthella	0	0	0	0	0	0	0	0	0	0	0	0	0	0	0	0
d__Bacteria;p__Actinomycetota;c__Thermoleophilia;o__Solirubrobacterales;f__Conexibacteraceae;g__Conexibacter	0	0	0	0	0	0	0	0	0	0	0	0	0	0	0	0
d__Bacteria;p__Actinomycetota;c__Thermoleophilia;o__Solirubrobacterales;f__Solirubrobacteraceae;g__Solirubrobacter	0	0	0	0	0	0	0	0	0	0	0	0	0	0	0	0
d__Bacteria;p__Bacillota;c__Bacilli;o__Bacillales;f__Alicyclobacillaceae;g__Tumebacillus	0	0	0	0	0	0	0	0	0	0	0	0	0	0	0	0
d__Bacteria;p__Bacillota;c__Bacilli;o__Bacillales;f__Bacillaceae;g__Anoxybacillus	0	0	0	0	0	0.0013370202680117902	0	0	0	0	0	0	0	0	0	0
d__Bacteria;p__Bacillota;c__Bacilli;o__Bacillales;f__Bacillaceae;g__Bacillus	8.962982880702697e-05	0.037813399095766524	0.024274565601690175	0.016056281136394235	0.00105333930972658	0.0016864687471512352	0	0	3.521064769986444e-05	0.0017498541788184318	0.03007452093683463	0.009092427749803117	0	0.0007699972823625328	0.0004013968610765464	0.00027915416288645404
d__Bacteria;p__Bacillota;c__Bacilli;o__Bacillales;f__Bacillaceae;g__Cytobacillus	0	0	0	0	4.482294935006723e-05	0.0001063538849554833	0	0	0	0	0	0	0	0	0	0
d__Bacteria;p__Bacillota;c__Bacilli;o__Bacillales;f__Bacillaceae;g__Domibacillus	0	0	0	0	0	0	0	0	0	0	0	0	0	9.058791557206268e-05	0	0
d__Bacteria;p__Bacillota;c__Bacilli;o__Bacillales;f__Bacillaceae;g__Geobacillus	0	0	0.00017246583020739015	0	4.482294935006723e-05	0.002157464523382661	0	0	0	0	0.00013307310149041873	0	0	0	0	0
d__Bacteria;p__Bacillota;c__Bacilli;o__Bacillales;f__Bacillaceae;g__Halalkalibacterium (ex Joshi et al. 2022)	0	0	0	0	0	3.038682427299523e-05	0	0	0	0	0	0	0	0	0	0
d__Bacteria;p__Bacillota;c__Bacilli;o__Bacillales;f__Bacillaceae;g__Halobacillus	0	0	0	0	0	0	0	0	0	0	0	0	0	0	0	0
d__Bacteria;p__Bacillota;c__Bacilli;o__Bacillales;f__Bacillaceae;g__Lysinibacillus	0	0	0	0	4.482294935006723e-05	0.00033425506700294756	0	0.00014328016047377972	0.0005633703631978311	0.000266644446296142	8.87154009936125e-05	0.00011932319881631387	0	0	0	0
d__Bacteria;p__Bacillota;c__Bacilli;o__Bacillales;f__Bacillaceae;g__Metabacillus	0	0	0	0	0	0	0	0	0	0	0	0	0	0	0	0.001849396329122758
d__Bacteria;p__Bacillota;c__Bacilli;o__Bacillales;f__Bacillaceae;g__Neobacillus	0	0	0	0	0	0	0	0	0	0	0	0	0	0	0	0
d__Bacteria;p__Bacillota;c__Bacilli;o__Bacillales;f__Bacillaceae;g__Niallia	0	0	0	0	0	0.040976632532134065	0	0.03543795969051486	0.05679477473988134	0.09289225897841848	0	0.049829367825692666	0.03972574060504554	0	0	0.04110545048503036
d__Bacteria;p__Bacillota;c__Bacilli;o__Bacillales;f__Bacillaceae;g__Oceanobacillus	0	0	0	0	0.0002689376961004034	0	0	0	0	0	0.00013307310149041873	0	0	0	0	0
d__Bacteria;p__Bacillota;c__Bacilli;o__Bacillales;f__Bacillaceae;g__Paucisalibacillus	0	0	0	0	0	0	0	0	0	0	0	0	0	0	0	0
d__Bacteria;p__Bacillota;c__Bacilli;o__Bacillales;f__Bacillaceae;g__Peribacillus	0	0	0	0	4.482294935006723e-05	0	0	0	0	0	0	0	0	0	0	0
d__Bacteria;p__Bacillota;c__Bacilli;o__Bacillales;f__Bacillaceae;g__Priestia	0	0	0	0	0	0	0	0	0	0	0	0	0	0	0	0
d__Bacteria;p__Bacillota;c__Bacilli;o__Bacillales;f__Bacillaceae;g__Pseudalkalibacillus	0	0	0	0	0	0	0	0	0	0	0	0	0	0	0	0
d__Bacteria;p__Bacillota;c__Bacilli;o__Bacillales;f__Bacillaceae;g__Psychrobacillus	0	0	0	0	0	0	0	0	0	0	0	0	0	0	0	0
d__Bacteria;p__Bacillota;c__Bacilli;o__Bacillales;f__Bacillaceae;g__Shouchella	0	0	0.017677747596257492	0	0	0	0	0	0	0	0	0	0	0	0	0
d__Bacteria;p__Bacillota;c__Bacilli;o__Bacillales;f__Bacillaceae;g__Virgibacillus	0	0	0	0	0.003944419542805917	0	0	0.001026841150062088	0	0	0.00013307310149041873	0	0	0.006431742005616451	0	0.0016051364365971107
d__Bacteria;p__Bacillota;c__Bacilli;o__Bacillales;f__Listeriaceae;g__Listeria	0	0	0	0	0	0	0	0	0	0	0	0	0	0	0.00012041905832296392	0
d__Bacteria;p__Bacillota;c__Bacilli;o__Bacillales;f__Paenibacillaceae;g__Aneurinibacillus	0	0	0	0	0	0	0	0	0	0	0	0	0	0	0	0
d__Bacteria;p__Bacillota;c__Bacilli;o__Bacillales;f__Paenibacillaceae;g__Brevibacillus	0	0	0	0	0	0	0	0	0	0	0	0	0	0	0	0
d__Bacteria;p__Bacillota;c__Bacilli;o__Bacillales;f__Paenibacillaceae;g__Paenibacillus	0	0.00771795223089921	0	0	0	0.0015497280379227567	0	0	0	0	0	0	0.0003663770543284832	0	0	0
d__Bacteria;p__Bacillota;c__Bacilli;o__Bacillales;f__Planococcaceae;g__Caryophanon	0	0	0	0	0.00017929179740026893	0	0	0	0	0	0	0	0	0	0	0
d__Bacteria;p__Bacillota;c__Bacilli;o__Bacillales;f__Planococcaceae;g__Jeotgalibacillus	0	0	0	6.732193348592971e-05	0.0001344688480502017	0	0	0	0	0	0.001596877217885025	0	0	0	0	0
d__Bacteria;p__Bacillota;c__Bacilli;o__Bacillales;f__Planococcaceae;g__Kurthia	0	0	0	0.008011310084825635	0.007888839085611834	0	0	0	0	0	0.10690205819730304	0	0	0.006658211794546607	0	0
d__Bacteria;p__Bacillota;c__Bacilli;o__Bacillales;f__Planococcaceae;g__Planococcus	0	0	0	0	4.482294935006723e-05	0	0	0	0	0	0.00013307310149041873	0	0	9.058791557206268e-05	0	0
d__Bacteria;p__Bacillota;c__Bacilli;o__Bacillales;f__Planococcaceae;g__Planomicrobium	0	0	0	0	0.008785298072613178	0	0	0	0	0	0	0	0	0	0	0
d__Bacteria;p__Bacillota;c__Bacilli;o__Bacillales;f__Planococcaceae;g__Rummeliibacillus	0	0	0	0	0	0	0	0	0	0	0.000177430801987225	0	0	0	0	0
d__Bacteria;p__Bacillota;c__Bacilli;o__Bacillales;f__Planococcaceae;g__Sporosarcina	0	0	0	0	0	0	0	0	0	0	0	0	0	9.058791557206268e-05	0	0
d__Bacteria;p__Bacillota;c__Bacilli;o__Bacillales;f__Planococcaceae;g__Ureibacillus	0	0	0	0	0	0	0	0	0	0	0	0	0	0	0	0
d__Bacteria;p__Bacillota;c__Bacilli;o__Bacillales;f__Staphylococcaceae;g__Macrococcus	0	0	0	0	0	0	0	0	0	0	0	0	0	0	0	0
d__Bacteria;p__Bacillota;c__Bacilli;o__Bacillales;f__Staphylococcaceae;g__Mammaliicoccus	0	0	0	0	0	0	0	0	0	0	0	0	0	0.00013588187335809404	0	0
d__Bacteria;p__Bacillota;c__Bacilli;o__Bacillales;f__Staphylococcaceae;g__Staphylococcus	0	0	8.623291510369507e-05	6.732193348592971e-05	0.0022635589421783953	0.002081497462700173	0	0	0	0	0.000177430801987225	0	0	0.022103451399583297	0	0.0011166166515458162
d__Bacteria;p__Bacillota;c__Bacilli;o__Bacillales;f__Thermoactinomycetaceae;g__Hazenella	0	0	0.0036217824343551933	0	0	0	0	0	0	0	0	0	0	0	0	0
d__Bacteria;p__Bacillota;c__Bacilli;o__Bacillales;f__Thermoactinomycetaceae;g__Planifilum	0	0	8.623291510369507e-05	0	0	0	0	0	0	0	0	0	0	0	0	0
d__Bacteria;p__Bacillota;c__Bacilli;o__Lactobacillales;f__Aerococcaceae;g__Aerococcus	0.0014340772609124316	0	0	0	0	0.0017928226321067184	0	0	0	0	0	0	0	0	0	0.0028264358992253474
d__Bacteria;p__Bacillota;c__Bacilli;o__Lactobacillales;f__Aerococcaceae;g__Hutsoniella	0	0	0	0	0	0	0	0	0	0	0	0	0	0	0	0
d__Bacteria;p__Bacillota;c__Bacilli;o__Lactobacillales;f__Carnobacteriaceae;g__Carnobacterium	0	0	0	0	0	0.006198912151691026	2.273605711297547e-05	0	0	0	0.005455997161107166	0.0016705247834283943	0	0	0.05711877333119255	0
d__Bacteria;p__Bacillota;c__Bacilli;o__Lactobacillales;f__Carnobacteriaceae;g__Granulicatella	0	0	0	0	0	0	0	0	0	0	0	0	0	0	0	0
d__Bacteria;p__Bacillota;c__Bacilli;o__Lactobacillales;f__Carnobacteriaceae;g__Marinilactibacillus	0	0	0	0	0	0	0	0	0	0	0	0	0	0	0	0
d__Bacteria;p__Bacillota;c__Bacilli;o__Lactobacillales;f__Enterococcaceae;g__Enterococcus	0	0	0	0	0	0	0	0	0	0	8.87154009936125e-05	7.159391928978833e-05	0	0.00018117583114412537	0.00032111748886123713	0
d__Bacteria;p__Bacillota;c__Bacilli;o__Lactobacillales;f__Lactobacillaceae;g__Lactiplantibacillus	0	0	0	0	0	0	0	0	0	0	0	0	0	0	0	0
d__Bacteria;p__Bacillota;c__Bacilli;o__Lactobacillales;f__Lactobacillaceae;g__Lactobacillus	0	0	0	0	0	3.038682427299523e-05	0	0	0	0	0	0	0	0	0	0
d__Bacteria;p__Bacillota;c__Bacilli;o__Lactobacillales;f__Lactobacillaceae;g__Latilactobacillus	0	0	0	0	0	0	0	0	0	0	0	0	0	0	0	0
d__Bacteria;p__Bacillota;c__Bacilli;o__Lactobacillales;f__Lactobacillaceae;g__Leuconostoc	0	9.133671279170662e-05	0	0	0	0	0	0	0	0	0	0	0	0	0	0
d__Bacteria;p__Bacillota;c__Bacilli;o__Lactobacillales;f__Lactobacillaceae;g__Ligilactobacillus	0	0	0	0	0	0	0	4.776005349125991e-05	0	0	0	0	0	0	0	0
d__Bacteria;p__Bacillota;c__Bacilli;o__Lactobacillales;f__Lactobacillaceae;g__Pediococcus	0	0	0	0	0	0	0	0	5.2815971549796656e-05	0	0	0	0	0	0	6.978854072161351e-05
d__Bacteria;p__Bacillota;c__Bacilli;o__Lactobacillales;f__Lactobacillaceae;g__Weissella	0	0	0	0	0	0	0	0	0	0	0	0	0	0	0	0
d__Bacteria;p__Bacillota;c__Bacilli;o__Lactobacillales;f__Streptococcaceae;g__Lactococcus	0	0	0	0	0	0	0	0	0	0	0	0	0	0	0	0
d__Bacteria;p__Bacillota;c__Bacilli;o__Lactobacillales;f__Streptococcaceae;g__Streptococcus	0	0	0	0	0	0	0	0	0	0	0	0	0	0.047422773801974814	0	0
d__Bacteria;p__Bacillota;c__Clostridia;o__Eubacteriales;f__Christensenellaceae;g__Gehongia	0	0	0	0	0	0	0	0	0	0	0	0	0	0	0	0
d__Bacteria;p__Bacillota;c__Clostridia;o__Eubacteriales;f__Clostridiaceae;g__Butyricicoccus	0	0	0	0	0	0.0028107812452520587	0	0	0	0	0	0	0	0	0	0
d__Bacteria;p__Bacillota;c__Clostridia;o__Eubacteriales;f__Clostridiaceae;g__Clostridium	0	0	0	0	0	0	6.82081713389264e-05	0.0033670837711338238	0	0	0.0023066004258339248	0	0	0	0	0
d__Bacteria;p__Bacillota;c__Clostridia;o__Eubacteriales;f__Eubacteriaceae;g__Acetobacterium	0	0	0	0	0	0	0	0	0	0	0	0	0	0	0	0
d__Bacteria;p__Bacillota;c__Clostridia;o__Eubacteriales;f__Eubacteriales Family XII. Incertae Sedis;g__Fusibacter	0	0	0	0	0	0	0	0	0	0	0	0	0	0	0	0
d__Bacteria;p__Bacillota;c__Clostridia;o__Eubacteriales;f__Lachnospiraceae;g__Anaerotignum	0	0	0	0	0	0.0012914400316022972	0	0	0	0	0	0	0	0	0	0
d__Bacteria;p__Bacillota;c__Clostridia;o__Eubacteriales;f__Lachnospiraceae;g__Blautia	8.962982880702697e-05	0	0	0.00013464386697185942	0	0.003980673979762375	0	0.004155124653739612	0.011232196616256757	0.008382634780434963	0	0.018638283655108227	0.004448864231131582	0	0	0.00013957708144322702
d__Bacteria;p__Bacillota;c__Clostridia;o__Eubacteriales;f__Lachnospiraceae;g__Butyrivibrio	0	0	0	0	0	0	0	0	0	0	0	0	0	0	0	0
d__Bacteria;p__Bacillota;c__Clostridia;o__Eubacteriales;f__Lachnospiraceae;g__Coprococcus	0	0	0	0	0	0	0	0	0	0	0	0	0	0	0	0
d__Bacteria;p__Bacillota;c__Clostridia;o__Eubacteriales;f__Lachnospiraceae;g__Kineothrix	0	0	0	0	0	0	0	0	0	0	0	0	0	0	0	0
d__Bacteria;p__Bacillota;c__Clostridia;o__Eubacteriales;f__Lachnospiraceae;g__Lacrimispora	0	0	0	0	0	0.0007596706068248808	0	0	0	0	0	0	0.0003663770543284832	0	0	0
d__Bacteria;p__Bacillota;c__Clostridia;o__Eubacteriales;f__Lachnospiraceae;g__Roseburia	0	0	0	0	0	0	0	0	0	0	0	0	0	0	0	0
d__Bacteria;p__Bacillota;c__Clostridia;o__Eubacteriales;f__Oscillospiraceae;g__Acetivibrio	0	0	0	0	0	0	0	0	0	0	0	0	0	0	0	0
d__Bacteria;p__Bacillota;c__Clostridia;o__Eubacteriales;f__Oscillospiraceae;g__Agathobaculum	0	0	0	0	0	0	0	0.002125322380361066	0	0.000799933338888426	0	0.004176311958570985	0.0022506019051606826	0	0	0.0013957708144322703
d__Bacteria;p__Bacillota;c__Clostridia;o__Eubacteriales;f__Oscillospiraceae;g__Ercella	0	0	0	0	0	0	0	0	0	0	0	0.0012886905472161898	0	0	8.027937221530928e-05	0
d__Bacteria;p__Bacillota;c__Clostridia;o__Eubacteriales;f__Oscillospiraceae;g__Faecalibacterium	0	0	0	0	0	0	0	0.007569968478364697	0	0	0	0	0	0	0	0
d__Bacteria;p__Bacillota;c__Clostridia;o__Eubacteriales;f__Oscillospiraceae;g__Flavonifractor	0	0	0	0	0	0	0	0	0	0	0.003992193044712562	0	0	0	0	0
d__Bacteria;p__Bacillota;c__Clostridia;o__Eubacteriales;f__Oscillospiraceae;g__Mageeibacillus	0	0	0	0	0	0	0	0	0.001602084470343832	0	0	0	0	0	0	0
d__Bacteria;p__Bacillota;c__Clostridia;o__Eubacteriales;f__Oscillospiraceae;g__Oscillospira	0	0	0	0	0	0	0	0	0	0	0	0	0	0	0	0
d__Bacteria;p__Bacillota;c__Clostridia;o__Eubacteriales;f__Oscillospiraceae;g__Pygmaiobacter	0	0	0	0	0	0	0	0	0	0	0	0	0	0	0	0
d__Bacteria;p__Bacillota;c__Clostridia;o__Eubacteriales;f__Oscillospiraceae;g__Ruminococcus	0	4.566835639585331e-05	0	0	0	0	2.273605711297547e-05	0	1.760532384993222e-05	0	0	0	0	0	0	0
d__Bacteria;p__Bacillota;c__Clostridia;o__Eubacteriales;f__Peptostreptococcaceae;g__Asaccharospora	0	0	0	0	0	0	0	0	0	0	0	0	0	9.058791557206268e-05	0	0
d__Bacteria;p__Bacillota;c__Clostridia;o__Eubacteriales;f__Peptostreptococcaceae;g__Tepidibacter	0	0	0	0	0	0	0	0.002985003343203745	0	0	0	0	0	0	8.027937221530928e-05	0
d__Bacteria;p__Bacillota;c__Clostridia;o__Eubacteriales;f__Peptostreptococcaceae;g__Terrisporobacter	0	0	0	0.00010098290022889458	4.482294935006723e-05	0	0	0	0	0	8.87154009936125e-05	0	0	0	8.027937221530928e-05	0
d__Bacteria;p__Bacillota;c__Clostridia;o__Thermoanaerobacterales;f__Thermoanaerobacteraceae;g__Gelria	0	0	0	0	0	0	0	0	0	0	0	0	0	0	0	0
d__Bacteria;p__Bacillota;c__Erysipelotrichia;o__Erysipelotrichales;f__Coprobacillaceae;g__Kandleria	0	0	0	0	0	0	0	0	0	0	0	0	0	0	0	0
d__Bacteria;p__Bacillota;c__Erysipelotrichia;o__Erysipelotrichales;f__Erysipelotrichaceae;g__Solobacterium	0	0	0	0	0	0	0	0	0	0	0	4.7729279526525546e-05	0	0	0	0
d__Bacteria;p__Bacillota;c__Negativicutes;o__Acidaminococcales;f__Acidaminococcaceae;g__Phascolarctobacterium	0	0	0	0	0	0	0	0	0	0	0	0	0	0	0	0
d__Bacteria;p__Bacillota;c__Negativicutes;o__Veillonellales;f__Veillonellaceae;g__Lucifera	0.005736309043649726	0	0	0	0	0	0	0	0	0	0	0	0	0	0	0
d__Bacteria;p__Bacillota;c__Tissierellia;o__Tissierellales;f__Peptoniphilaceae;g__Peptoniphilus	0	0	0	0	0	0	0	4.776005349125991e-05	0	0	0	0	0	0	0	0
d__Bacteria;p__Bacillota;c__Tissierellia;o__Tissierellales;f__Thermohalobacteraceae;g__Brassicibacter	0	0	0	0	0	0	0	0	0	0	0	0	0	0	0	0
d__Bacteria;p__Bacillota;c__Tissierellia;o__Tissierellales;f__Tissierellaceae;g__Tissierella	0	0	0	0	0	0	0	0	0	0	0	0	0	0	0	0
d__Bacteria;p__Bacteroidota;c__Bacteroidia;o__Bacteroidales;f__Bacteroidaceae;g__Bacteroides	0	0	0	0	0	0	0	4.776005349125991e-05	0	0	0	0.001670524783428394	0	0	0	0
d__Bacteria;p__Bacteroidota;c__Bacteroidia;o__Bacteroidales;f__Bacteroidaceae;g__Phocaeicola	0	0	0	6.732193348592971e-05	0	0	0	0	0	0	0	0	0	0	0	0
d__Bacteria;p__Bacteroidota;c__Bacteroidia;o__Bacteroidales;f__Dysgonomonadaceae;g__Dysgonomonas	0	0	0	0	0	0	0	0	0	0.00011665694525456213	0	0	0	0	0	0
d__Bacteria;p__Bacteroidota;c__Bacteroidia;o__Bacteroidales;f__Muribaculaceae;g__Muribaculum	0	0	0	0	0	0	0	0	0	0	0	0	0	0	0	0
d__Bacteria;p__Bacteroidota;c__Bacteroidia;o__Bacteroidales;f__Porphyromonadaceae;g__Microbacter	0	0	0	0	0	0	0	0	0	0.000133322223148071	0	0	0	0	0	0
d__Bacteria;p__Bacteroidota;c__Bacteroidia;o__Bacteroidales;f__Prevotellaceae;g__Hoylesella	0	0	0	0	0	0	0	0	0	0	0	0	0	0	0	0
d__Bacteria;p__Bacteroidota;c__Bacteroidia;o__Bacteroidales;f__Tannerellaceae;g__Parabacteroides	0	0	0	0.005655042412818096	0	0	0	0	0	3.333055578701775e-05	0	0	0	0	0	0
d__Bacteria;p__Bacteroidota;c__Chitinophagia;o__Chitinophagales;f__Chitinophagaceae;g__Chitinophaga	0	0	0	0	0	0	0	0	0	0	0	0	0	0	0	0
d__Bacteria;p__Bacteroidota;c__Cytophagia;o__Cytophagales;f__Cyclobacteriaceae;g__Algoriphagus	0	0	8.623291510369507e-05	0	0	0	0	0	0	0	0	0	0	0	0	0
d__Bacteria;p__Bacteroidota;c__Cytophagia;o__Cytophagales;f__Cytophagaceae;g__Siphonobacter	0	0	0.0016384253869702065	0	0	0	0	0	0	0	0	0	0	0	0	0
d__Bacteria;p__Bacteroidota;c__Cytophagia;o__Cytophagales;f__Microscillaceae;g__Microscilla	0	0	0	0	0	0	0	0	0	0	0	0	0	0	0	0
d__Bacteria;p__Bacteroidota;c__Flavobacteriia;o__Flavobacteriales;f__Flavobacteriaceae;g__Capnocytophaga	0	0	0	0	0.0001344688480502017	0	0	0	0	0	0	0	0	0	0	6.978854072161351e-05
d__Bacteria;p__Bacteroidota;c__Flavobacteriia;o__Flavobacteriales;f__Flavobacteriaceae;g__Dokdonia	0	0	0	0	4.482294935006723e-05	0	0	0	0	0	0	0	0	0	0	0
d__Bacteria;p__Bacteroidota;c__Flavobacteriia;o__Flavobacteriales;f__Flavobacteriaceae;g__Flavobacterium	0	0	0	0	0	0	0	0	0	0	0	0	0	0	0	0
d__Bacteria;p__Bacteroidota;c__Flavobacteriia;o__Flavobacteriales;f__Flavobacteriaceae;g__Lutibacter	0	0	0	0	0	0	0	0	0	0	0	0	0	0	0	0
d__Bacteria;p__Bacteroidota;c__Flavobacteriia;o__Flavobacteriales;f__Flavobacteriaceae;g__Marixanthomonas	0	0	8.623291510369507e-05	0	0	0	0	0	0	0	0	0	0	0	0	0
d__Bacteria;p__Bacteroidota;c__Flavobacteriia;o__Flavobacteriales;f__Flavobacteriaceae;g__Nonlabens	0	0	0	0	0	0	0	0	0	0	0	0	0	0	0	6.978854072161351e-05
d__Bacteria;p__Bacteroidota;c__Flavobacteriia;o__Flavobacteriales;f__Flavobacteriaceae;g__Sediminicola	0	0	0	0	4.482294935006723e-05	0	0	0	0	0	0	0	0	0	0	0
d__Bacteria;p__Bacteroidota;c__Flavobacteriia;o__Flavobacteriales;f__Flavobacteriaceae;g__Winogradskyella	0	0	0	0	0.0011429852084267145	0	0	0	0	0	0	0	0	0	0	0
d__Bacteria;p__Bacteroidota;c__Flavobacteriia;o__Flavobacteriales;f__Weeksellaceae;g__Chryseobacterium	0.012368916375369724	0.001004703840708773	0.0006467468632777131	0.004813518244243975	0.001994621246077992	6.077364854599046e-05	0.0002728326853557056	0.00014328016047377972	3.521064769986444e-05	0.0022498125156236977	0.003238112136266856	0	0.00010467915837956663	0.0008152912401485642	0.0013647493276602578	6.978854072161351e-05
d__Bacteria;p__Bacteroidota;c__Flavobacteriia;o__Flavobacteriales;f__Weeksellaceae;g__Empedobacter	0.00022407457201756745	9.133671279170662e-05	0	0.004173959876127642	0	3.038682427299523e-05	0	0	0	0	0.00022178850248403122	0	0	0	0.00024083811664592783	0
d__Bacteria;p__Bacteroidota;c__Flavobacteriia;o__Flavobacteriales;f__Weeksellaceae;g__Epilithonimonas	0.45890472349197814	0.4597433438370553	0.2936230759280818	0.43412548808401774	0.5331913939937248	0.06002917135130208	0.4116817861446468	0.04909733498901519	0.04366120314783191	0.058678443463044745	0.36714868701206527	0.021621363625516074	0.14382916361352455	0.4550683938762569	0.49010556737446304	0.14446227929373998
d__Bacteria;p__Bacteroidota;c__Flavobacteriia;o__Flavobacteriales;f__Weeksellaceae;g__Kaistella	0	0	0	0	0	0	0	0	0	0	0.00013307310149041873	0	0	0	0	0
d__Bacteria;p__Bacteroidota;c__Flavobacteriia;o__Flavobacteriales;f__Weeksellaceae;g__Riemerella	0	0	0	0	0	0	0	0	0	0	0	0	0	0	0	0
d__Bacteria;p__Bacteroidota;c__Sphingobacteriia;o__Sphingobacteriales;f__Sphingobacteriaceae;g__Sphingobacterium	0	0	0	0.011007136124949508	0	0	0	0	0	3.333055578701775e-05	0	0	0	0	0	0
d__Bacteria;p__Campylobacterota;c__Epsilonproteobacteria;o__Campylobacterales;f__Helicobacteraceae;g__Helicobacter	0	0	0	0	0	0.000516576012640919	0	0	0	0.0025831180734938756	0	0.003985394840464883	0	0	0	0.001570242166236304
d__Bacteria;p__Chlamydiota;c__Chlamydiia;o__Chlamydiales;f__Chlamydiaceae;g__Chlamydia	0	0	0.0002586987453110852	0	0	0	0	0	0	0	0	0	0	0	0	0
d__Bacteria;p__Chloroflexota;c__Chloroflexia;o__Chloroflexales;f__Oscillochloridaceae;g__Oscillochloris	0	0	0	0	0	0.0003494484791394451	0	0	0	0	0	0	0	0	0	0.0010817223811850094
d__Bacteria;p__Chloroflexota;c__Tepidiformia;o__Tepidiformales;f__Tepidiformaceae;g__Tepidiforma	0	0	0	0	0	0	0	0	0	0	0	0	0	0	0	0
d__Bacteria;p__Cyanobacteriota;c__Cyanophyceae;o__Chroococcales;f__Microcystaceae;g__Microcystis	0	0	0	0	0	3.038682427299523e-05	0	0	0	0	0	0	0	0	0	0
d__Bacteria;p__Cyanobacteriota;c__Cyanophyceae;o__Chroococcidiopsidales;f__Chroococcidiopsidaceae;g__Chroococcidiopsis	0	0	0	0	0	0	0	0	0	0	0	0	0	0	0	0
d__Bacteria;p__Cyanobacteriota;c__Cyanophyceae;o__Nodosilineales;f__Nodosilineaceae;g__Nodosilinea	0	0	0	0	0	0	0	0	0	0	0	0	0	0	0	0
d__Bacteria;p__Cyanobacteriota;c__Cyanophyceae;o__Nostocales;f__Aphanizomenonaceae;g__Aphanizomenon	0	0	0	0	0	0.0006837035461423926	0	0	0	0	0	0	0	0	0	0
d__Bacteria;p__Cyanobacteriota;c__Cyanophyceae;o__Nostocales;f__Nostocaceae;g__Anabaena	0	0	8.623291510369507e-05	0	0	0	0	0	0	0	0	0	0	0	0	0
d__Bacteria;p__Cyanobacteriota;c__Cyanophyceae;o__Nostocales;f__Nostocaceae;g__Atlanticothrix	0	0	0	0	0	0	0	0	0	0	0	0	0	0	0	0
d__Bacteria;p__Cyanobacteriota;c__Cyanophyceae;o__Nostocales;f__Nostocaceae;g__Nostoc	0	0.008859661140795543	0	0	0	0	0	0	0	0	8.87154009936125e-05	0	0	0	0	0
d__Bacteria;p__Cyanobacteriota;c__Cyanophyceae;o__Nostocales;f__Nostocaceae;g__Trichormus	0	0	0	0	0	0	0	0	0	0	0	0	0	0	0	0
d__Bacteria;p__Cyanobacteriota;c__Cyanophyceae;o__Nostocales;f__Rivulariaceae;g__Phyllonema	0	0	0	0	0	0	0	0	0	0	0	0	0	0	0	0
d__Bacteria;p__Cyanobacteriota;c__Cyanophyceae;o__Nostocales;f__Scytonemataceae;g__Iningainema	0	0	0	0	0	3.038682427299523e-05	0	0	0	0	0	0	0	0	0	0
d__Bacteria;p__Cyanobacteriota;c__Cyanophyceae;o__Pseudanabaenales;f__Leptolyngbyaceae;g__Leptolyngbya	0	0	0	0	0	0	0	0	0	0	0	0	0	0	0	0
d__Bacteria;p__Cyanobacteriota;c__Cyanophyceae;o__Pseudanabaenales;f__Leptolyngbyaceae;g__Phormidesmis	0	0	0	0	0	0	0	0	0	0	0	0	0	0	0	0
d__Bacteria;p__Cyanobacteriota;c__Cyanophyceae;o__Synechococcales;f__Merismopediaceae;g__Aphanocapsa	0	0	0	6.732193348592971e-05	0	0	0	0	0	0	0	0	0	0	0	0
d__Bacteria;p__Cyanobacteriota;c__Cyanophyceae;o__Synechococcales;f__Merismopediaceae;g__Synechocystis	0	0	0	0	0	0	0	0	0	0	0	0	0	0	0	0
d__Bacteria;p__Cyanobacteriota;c__Cyanophyceae;o__Synechococcales;f__Prochlorococcaceae;g__Cyanobium	0	0	0	0	0	0	0	0	0	0	0	0	0	0	0	0
d__Bacteria;p__Cyanobacteriota;c__Cyanophyceae;o__Synechococcales;f__Synechococcaceae;g__Synechococcus	0	0	4.311645755184754e-05	0	0	0	0	0	0	0	0	0	0	0	0	0
d__Bacteria;p__Deinococcota;c__Deinococci;o__Deinococcales;f__Deinococcaceae;g__Deinococcus	0	0	0	0	0	0	0	0	0	0	0	0	0	0	0	0
d__Bacteria;p__Deinococcota;c__Deinococci;o__Thermales;f__Thermaceae;g__Thermus	0	0	0	0	0	0	0	0	0	0.0019165069577535207	0	0	0	0	0	0
d__Bacteria;p__Gemmatimonadota;c__Gemmatimonadetes;o__Gemmatimonadales;f__Gemmatimonadaceae;g__Gemmatimonas	0	0	0	0	0	0	0	0	0	0	0	0	0	0	0	0
d__Bacteria;p__Mycoplasmatota;c__Mollicutes;o__Acholeplasmatales;f__Acholeplasmataceae;g__Candidatus Phytoplasma	0	0	0	0	0	0	0	0	0	0	0	0	0	0	0	0
d__Bacteria;p__Mycoplasmatota;c__Mollicutes;o__Mycoplasmatales;f__Mycoplasmataceae;g__Mycoplasma	0	0	0	0	0	0	0	0	0	3.333055578701775e-05	0	0	0	0	0	0
d__Bacteria;p__Myxococcota;c__Myxococcia;o__Myxococcales;f__Myxococcaceae;g__Myxococcus	0	0	0.0002155822877592377	0	0	0	0	0	0	0	0.0034599006387508874	0	0	0	0	0
d__Bacteria;p__Nitrospirota;c__Nitrospiria;o__Nitrospirales;f__Nitrospiraceae;g__Leptospirillum	0	0	0	0	0	0	0	0	0	0	0	0	0	0	0	0
d__Bacteria;p__Planctomycetota;c__Planctomycetia;o__Isosphaerales;f__Isosphaeraceae;g__Aquisphaera	0	0	0	0	0	0	0	0	0	0	0	0	0	0	0	0
d__Bacteria;p__Planctomycetota;c__Planctomycetia;o__Isosphaerales;f__Isosphaeraceae;g__Tundrisphaera	0	0	0	0	0	0	0	0	0	0	0	0	0	0	0	0
d__Bacteria;p__Planctomycetota;c__Planctomycetia;o__Pirellulales;f__Pirellulaceae;g__Blastopirellula	0	0	0	0	0	0	0	0	0	0	0	0	0	0	0	0
d__Bacteria;p__Planctomycetota;c__Planctomycetia;o__Pirellulales;f__Pirellulaceae;g__Lignipirellula	0	0	0	0	0	0	0	0	0	0	0	0	0	0	0	0
d__Bacteria;p__Planctomycetota;c__Planctomycetia;o__Pirellulales;f__Pirellulaceae;g__Pirellula	0	0	0	0	0	0	0	0	0	0	0	0	0	0	0	0
d__Bacteria;p__Planctomycetota;c__Planctomycetia;o__Pirellulales;f__Pirellulaceae;g__Rhodopirellula	0	0	0	0	0	0	0	0	0	0	0	0	0	0	0	0
d__Bacteria;p__Planctomycetota;c__Planctomycetia;o__Pirellulales;f__Pirellulaceae;g__Roseimaritima	0	0	0	0	0	0	0	0	0	0	0	0	0	0	0	0
d__Bacteria;p__Pseudomonadota;c__Alphaproteobacteria;o__Caulobacterales;f__Caulobacteraceae;g__Brevundimonas	0.0034507484090705383	0	0.011468977708791444	3.3660966742964855e-05	0	0	0	0	0	0	8.87154009936125e-05	0	0	0	0.001966844619275077	0
d__Bacteria;p__Pseudomonadota;c__Alphaproteobacteria;o__Caulobacterales;f__Caulobacteraceae;g__Caulobacter	0	0	0	0	0	0	0	0	0	0	0	0	0	0	0	0
d__Bacteria;p__Pseudomonadota;c__Alphaproteobacteria;o__Hyphomicrobiales;f__Amorphaceae;g__Amorphus	0	0	0	0	0	0	0	0	0	0	0	0	0	0	0	0
d__Bacteria;p__Pseudomonadota;c__Alphaproteobacteria;o__Hyphomicrobiales;f__Aurantimonadaceae;g__Aureimonas	0	0	0	0	0	0	0	0	0	0	0	0	0	0	0	0
d__Bacteria;p__Pseudomonadota;c__Alphaproteobacteria;o__Hyphomicrobiales;f__Bartonellaceae;g__Bartonella	0	0.00013700506918755994	0	0	4.482294935006723e-05	0	0	0	0	0	0	0	0	0	0	0
d__Bacteria;p__Pseudomonadota;c__Alphaproteobacteria;o__Hyphomicrobiales;f__Beijerinckiaceae;g__Beijerinckia	0	0	0	0	0	0	0	0	0	0	0	0	0	0	0	0
d__Bacteria;p__Pseudomonadota;c__Alphaproteobacteria;o__Hyphomicrobiales;f__Brucellaceae;g__Brucella	0	0	0	0	6.723442402510085e-05	0	0	0	0	0	0	0	0	0	0	0
d__Bacteria;p__Pseudomonadota;c__Alphaproteobacteria;o__Hyphomicrobiales;f__Brucellaceae;g__Ochrobactrum	0	9.133671279170662e-05	0	0	8.964589870013447e-05	0.0007140903704153879	0	0	0	0	0	0	0	0	0	0
d__Bacteria;p__Pseudomonadota;c__Alphaproteobacteria;o__Hyphomicrobiales;f__Devosiaceae;g__Devosia	0.0003137044008245944	0	0.000560513948174018	6.732193348592971e-05	0	0	0	0	0	0	0	0	0	0	0.00024083811664592783	0
d__Bacteria;p__Pseudomonadota;c__Alphaproteobacteria;o__Hyphomicrobiales;f__Hyphomicrobiaceae;g__Rhodoplanes	0	0	0	0	0	0	0	0	0	0	0	0	0	0	0	0
d__Bacteria;p__Pseudomonadota;c__Alphaproteobacteria;o__Hyphomicrobiales;f__Methylobacteriaceae;g__Methylobacterium	0	4.566835639585331e-05	0	0.00895381715362865	0.00011205737337516809	0	2.273605711297547e-05	0.00045372050816696913	0	0	0	0.000739803832661146	0	0.012999365884590993	0	0
d__Bacteria;p__Pseudomonadota;c__Alphaproteobacteria;o__Hyphomicrobiales;f__Methylocystaceae;g__Methylocystis	8.962982880702697e-05	9.133671279170662e-05	0	0	0.0001344688480502017	0	0	0	0	0	0	0	0	0	0	0
d__Bacteria;p__Pseudomonadota;c__Alphaproteobacteria;o__Hyphomicrobiales;f__Nitrobacteraceae;g__Afipia	0	0	0	0	0	0	0	0	0	0	0	0	0	0	0	0
d__Bacteria;p__Pseudomonadota;c__Alphaproteobacteria;o__Hyphomicrobiales;f__Nitrobacteraceae;g__Bradyrhizobium	0	0	0	0	0	0	0	0	0	3.333055578701775e-05	0	0	0	0	0	0
d__Bacteria;p__Pseudomonadota;c__Alphaproteobacteria;o__Hyphomicrobiales;f__Phyllobacteriaceae;g__Hoeflea	0	9.133671279170662e-05	0	0	0	0	0	0	0	0	0	0	0	0	0	0
d__Bacteria;p__Pseudomonadota;c__Alphaproteobacteria;o__Hyphomicrobiales;f__Phyllobacteriaceae;g__Lentilitoribacter	0	0.013380828423985022	0	0	0	0	0	0	0	0	0	0	0	0	0	0
d__Bacteria;p__Pseudomonadota;c__Alphaproteobacteria;o__Hyphomicrobiales;f__Phyllobacteriaceae;g__Mesorhizobium	0.0016581518329299991	0.00018267342558341324	0	0	0.004437471985656656	0	0	0	0	0	0	0	0	0	0	0
d__Bacteria;p__Pseudomonadota;c__Alphaproteobacteria;o__Hyphomicrobiales;f__Pleomorphomonadaceae;g__Pleomorphomonas	0	0	0.00017246583020739015	0.0001683048337148243	0.0003809950694755715	0	0.00013641634267785283	7.164008023688987e-05	0	0	0	0	0.00020935831675913326	9.058791557206268e-05	0	0.00020936562216484052
d__Bacteria;p__Pseudomonadota;c__Alphaproteobacteria;o__Hyphomicrobiales;f__Rhizobiaceae;g__Agrobacterium	0	0	0	0	0	0	0	0	0	0	0	0	0	0	0	0
d__Bacteria;p__Pseudomonadota;c__Alphaproteobacteria;o__Hyphomicrobiales;f__Rhizobiaceae;g__Rhizobium	0	0	0	0	0.0005378753922008068	4.558023640949285e-05	0	0	0	0	8.87154009936125e-05	0	0	0.00013588187335809404	0	0
d__Bacteria;p__Pseudomonadota;c__Alphaproteobacteria;o__Hyphomicrobiales;f__Rhizobiaceae;g__Sinorhizobium	0	0	0	0	0	0	0	0	0	0	0	0	0	0	0	0
d__Bacteria;p__Pseudomonadota;c__Alphaproteobacteria;o__Hyphomicrobiales;f__Xanthobacteraceae;g__Azorhizobium	0	0	0	0	0	0	0	0	0	0	0	0	0	0.00036235166228825073	0	0
d__Bacteria;p__Pseudomonadota;c__Alphaproteobacteria;o__Hyphomonadales;f__Hyphomonadaceae;g__Hyphomonas	0	0	0	0	0	0	0	0	0	0	0	0	0	0	0	0
d__Bacteria;p__Pseudomonadota;c__Alphaproteobacteria;o__Rhodobacterales;f__Paracoccaceae;g__Paracoccus	0	0	0.002328288707799767	0	0	0	4.547211422595094e-05	0	0	0	0	0	0	0	0	0
d__Bacteria;p__Pseudomonadota;c__Alphaproteobacteria;o__Rhodobacterales;f__Roseobacteraceae;g__Roseobacter	0	0	0	0	0	0	0	0	0	0	0	0	0	0	0	0
d__Bacteria;p__Pseudomonadota;c__Alphaproteobacteria;o__Rhodobacterales;f__Roseobacteraceae;g__Roseovarius	0	0	0	0	0	0	0	0	0	0	0	0	0	0	0	0
d__Bacteria;p__Pseudomonadota;c__Alphaproteobacteria;o__Rhodobacterales;f__Roseobacteraceae;g__Sulfitobacter	0	0	0	0	0	0	0	0	0	0	0	0	0	0	0	0
d__Bacteria;p__Pseudomonadota;c__Alphaproteobacteria;o__Rhodospirillales;f__Acetobacteraceae;g__Acetobacter	0	0	0	0	0	0	0	7.164008023688987e-05	0	0	0	0	0	0	0	6.978854072161351e-05
d__Bacteria;p__Pseudomonadota;c__Alphaproteobacteria;o__Rhodospirillales;f__Acetobacteraceae;g__Acidiphilium	0	0	0	0	0	0	0	0	0	0	0	0	0	0	0	0
d__Bacteria;p__Pseudomonadota;c__Alphaproteobacteria;o__Rhodospirillales;f__Acetobacteraceae;g__Asaia	0	0	0	0	0.00015688032272523532	0	0	0	3.521064769986444e-05	0	0	0	0	9.058791557206268e-05	0	0
d__Bacteria;p__Pseudomonadota;c__Alphaproteobacteria;o__Rhodospirillales;f__Acetobacteraceae;g__Oecophyllibacter	0	4.566835639585331e-05	0	0	0	0	0	7.164008023688987e-05	7.042129539972888e-05	6.66611115740355e-05	0	4.7729279526525546e-05	0	0	0	0
d__Bacteria;p__Pseudomonadota;c__Alphaproteobacteria;o__Rhodospirillales;f__Acetobacteraceae;g__Pseudoroseomonas	0	0	0	0	0.0013895114298520842	0	0	0	0	0	0	0	0	0.008515264063773892	0	0
d__Bacteria;p__Pseudomonadota;c__Alphaproteobacteria;o__Rhodospirillales;f__Acetobacteraceae;g__Roseomonas	0	0	0	0	8.964589870013447e-05	0	0	0	0	0	0	0	0	9.058791557206268e-05	0	0
d__Bacteria;p__Pseudomonadota;c__Alphaproteobacteria;o__Rhodospirillales;f__Thalassospiraceae;g__Thalassospira	0	0	0	0	0	0	0	0	0	0	0	0	0	0	0	0
d__Bacteria;p__Pseudomonadota;c__Alphaproteobacteria;o__Sneathiellales;f__Sneathiellaceae;g__Sneathiella	0	0	0	0	0	0	0	0	0	0	0	0	0	0	0	0
d__Bacteria;p__Pseudomonadota;c__Alphaproteobacteria;o__Sphingomonadales;f__Erythrobacteraceae;g__Altererythrobacter	0	0	0	0	0	0	0	0	0	0	0	0	0	0	0	0
d__Bacteria;p__Pseudomonadota;c__Alphaproteobacteria;o__Sphingomonadales;f__Erythrobacteraceae;g__Aurantiacibacter	0	0	0	0	0	0	0	0	0	0	0	0	0	0	0	0
d__Bacteria;p__Pseudomonadota;c__Alphaproteobacteria;o__Sphingomonadales;f__Erythrobacteraceae;g__Erythrobacter	0	0	0	6.732193348592971e-05	0	0	0	0	0	0	8.87154009936125e-05	0	0.00010467915837956663	0	0	0
d__Bacteria;p__Pseudomonadota;c__Alphaproteobacteria;o__Sphingomonadales;f__Sphingomonadaceae;g__Novosphingobium	0	0	0	0	0	0	0	0	0	0	0	0	0	0	0	0
d__Bacteria;p__Pseudomonadota;c__Alphaproteobacteria;o__Sphingomonadales;f__Sphingomonadaceae;g__Parasphingopyxis	0	0	0	0	0	0	0	0	0	0	0	0	0	0	0	0
d__Bacteria;p__Pseudomonadota;c__Alphaproteobacteria;o__Sphingomonadales;f__Sphingomonadaceae;g__Parasphingorhabdus	0	0	0	0	0	0	0	0	0	0	0	0	0	0	0	0
d__Bacteria;p__Pseudomonadota;c__Alphaproteobacteria;o__Sphingomonadales;f__Sphingomonadaceae;g__Sphingobium	0	0	0	6.732193348592971e-05	0	0	0	0	0	0.00018331805682859762	0	0	0	0	0	0
d__Bacteria;p__Pseudomonadota;c__Alphaproteobacteria;o__Sphingomonadales;f__Sphingomonadaceae;g__Sphingomonas	0.09070538675271134	0.15792117641686085	0.17173285042900888	0.19769085768143274	0.18982519049753477	0.015953082743322494	0.20200986744878707	0.013014614576368325	0.026038273974049755	0.03414715440379969	0.15037260468417318	0.014271054578431138	0.06898356537213442	0.12292780143128908	0.18821498815879253	0.04044245934817503
d__Bacteria;p__Pseudomonadota;c__Alphaproteobacteria;o__Sphingomonadales;f__Sphingomonadaceae;g__Sphingorhabdus	0	0	8.623291510369507e-05	0	0	0	0.00011368028556487734	0	0	0	0	0	0	0	0	0
d__Bacteria;p__Pseudomonadota;c__Alphaproteobacteria;o__Sphingomonadales;f__Sphingomonadaceae;g__Stakelama	0	0	0	0	8.964589870013447e-05	0	0	0	0	0	0	0	0	0	0	0
d__Bacteria;p__Pseudomonadota;c__Alphaproteobacteria;o__Sphingomonadales;f__Sphingosinicellaceae;g__Sandaracinobacteroides	0	0	0	0	0	0	0	0	0	0	0	0	0	0	0	0
d__Bacteria;p__Pseudomonadota;c__Betaproteobacteria;o__Burkholderiales;f__Alcaligenaceae;g__Achromobacter	0	0.0002740101383751199	0.00021558228775923769	0.014036623131816346	6.723442402510085e-05	0.0003646418912759428	0	0.0001671601872194097	0.0002464745338990511	0.000266644446296142	0	9.545855905305109e-05	0.0002616978959489166	9.058791557206268e-05	0	0.00013957708144322702
d__Bacteria;p__Pseudomonadota;c__Betaproteobacteria;o__Burkholderiales;f__Alcaligenaceae;g__Alcaligenes	0.00013444474321054048	0.0006393569895419464	0	0.0008078632018311564	6.723442402510085e-05	6.077364854599046e-05	0	0	0	0	8.87154009936125e-05	0	0.00015701873756934995	0.0004982335356463448	8.027937221530928e-05	0
d__Bacteria;p__Pseudomonadota;c__Betaproteobacteria;o__Burkholderiales;f__Alcaligenaceae;g__Bordetella	0	0.00018267342558341324	0.00017246583020739015	0	0	0.0002127077699109666	0	0	0.0002640798577489833	0.000133322223148071	0	9.545855905305109e-05	0.00015701873756934995	0	0.00016055874443061857	0
d__Bacteria;p__Pseudomonadota;c__Betaproteobacteria;o__Burkholderiales;f__Burkholderiaceae;g__Burkholderia	0.39755310567356816	0.2186144220669498	0.4216789548570689	0.22371078497374444	0.19441954280591664	0.2573764015922696	0.35277266216492736	0.2470388766835419	0.22177426453759616	0.21608199316723609	0.30269694819020576	0.23602128725866886	0.25489375065424474	0.24916206178095843	0.22072813390599283	0.2438411612813176
d__Bacteria;p__Pseudomonadota;c__Betaproteobacteria;o__Burkholderiales;f__Burkholderiaceae;g__Caballeronia	0	0.0010960405535004796	0.00043116457551847537	0.0001683048337148243	0.00031376064545047064	6.077364854599046e-05	0	0	0	3.333055578701775e-05	8.87154009936125e-05	0	0	0.0002717637467161881	0.00016055874443061857	0
d__Bacteria;p__Pseudomonadota;c__Betaproteobacteria;o__Burkholderiales;f__Burkholderiaceae;g__Candidatus Glomeribacter	0	0	0	0	0	0	0	0	0	0	0	0	0	0	0	0
d__Bacteria;p__Pseudomonadota;c__Betaproteobacteria;o__Burkholderiales;f__Burkholderiaceae;g__Cupriavidus	0.00022407457201756745	9.133671279170662e-05	0	0	0	0	0	0	0	0	0	0	0	9.058791557206268e-05	0	0
d__Bacteria;p__Pseudomonadota;c__Betaproteobacteria;o__Burkholderiales;f__Burkholderiaceae;g__Pandoraea	0	9.133671279170662e-05	0.00021558228775923769	0	0.00020170327207530254	0	0	0.00014328016047377974	3.521064769986444e-05	3.333055578701775e-05	0	0.00011932319881631387	0	0.00018117583114412537	0.00012041905832296392	0
d__Bacteria;p__Pseudomonadota;c__Betaproteobacteria;o__Burkholderiales;f__Burkholderiaceae;g__Paraburkholderia	0	0.0003653468511668265	8.623291510369507e-05	0.0004039316009155783	0.00011205737337516809	0.00016712753350147378	0.0002728326853557056	7.164008023688987e-05	0	0	0.00013307310149041873	0	5.2339579189783314e-05	0	0.0003612571749688917	0.00041873124432968104
d__Bacteria;p__Pseudomonadota;c__Betaproteobacteria;o__Burkholderiales;f__Burkholderiaceae;g__Polynucleobacter	0	0	0	0	0	0	0	0	0	0	0	0	0	9.058791557206268e-05	0	0
d__Bacteria;p__Pseudomonadota;c__Betaproteobacteria;o__Burkholderiales;f__Burkholderiaceae;g__Ralstonia	0	0.018450015983924723	0.00021558228775923769	0.0006732193348592972	0.004168534289556253	0.008082895256616731	0	0	0.00012323726694952553	0.00011665694525456213	0	0	0.00015701873756934995	0.018887580396775072	0.009111708746437604	0
d__Bacteria;p__Pseudomonadota;c__Betaproteobacteria;o__Burkholderiales;f__Comamonadaceae;g__Acidovorax	0	0	0	6.732193348592971e-05	0	4.558023640949285e-05	0	0	7.042129539972888e-05	0	0	0	0.0004187166335182665	0	0	0.00020936562216484055
d__Bacteria;p__Pseudomonadota;c__Betaproteobacteria;o__Burkholderiales;f__Comamonadaceae;g__Comamonas	0	0	0.0002155822877592377	0	0	0	0	0	0	0	0	0	0	0	0	0
d__Bacteria;p__Pseudomonadota;c__Betaproteobacteria;o__Burkholderiales;f__Comamonadaceae;g__Delftia	0	0.01132575238617162	0	0	0	0.0009116047281898568	0	0.0003104403476931894	0.0004753437439481699	3.333055578701775e-05	0	0.00035796959644894164	0.0031927143305767822	0	0	0.00045362551469048786
d__Bacteria;p__Pseudomonadota;c__Betaproteobacteria;o__Burkholderiales;f__Comamonadaceae;g__Diaphorobacter	0	0	0	0	0	0	0	0	0	4.999583368052662e-05	0	0	0	0	0	0
d__Bacteria;p__Pseudomonadota;c__Betaproteobacteria;o__Burkholderiales;f__Comamonadaceae;g__Hydrogenophaga	0	0.0007306937023336531	0	0	0	0	0	0	8.80266192496611e-05	0	0	0	0	0	0	0
d__Bacteria;p__Pseudomonadota;c__Betaproteobacteria;o__Burkholderiales;f__Comamonadaceae;g__Kinneretia	0	0	0	0.000235626767200754	0	0	0	0	0	0	0	0	0	0	0	0
d__Bacteria;p__Pseudomonadota;c__Betaproteobacteria;o__Burkholderiales;f__Comamonadaceae;g__Paracidovorax	0	0	0	0.00013464386697185942	0	0	0	0	0	0	0	0	0.00015701873756934995	0	0	0
d__Bacteria;p__Pseudomonadota;c__Betaproteobacteria;o__Burkholderiales;f__Comamonadaceae;g__Polaromonas	0	0	0	0	0	0	0	0	0	0	0	0	0	0	0	6.978854072161351e-05
d__Bacteria;p__Pseudomonadota;c__Betaproteobacteria;o__Burkholderiales;f__Comamonadaceae;g__Rhodoferax	0	0.00022834178197926657	0	0	0	0.020982102160503203	0.00025009662824273014	0.027485910784220084	0.02191862819316561	0.027081076576951923	0	0.03078538529460898	0.024913639694336857	0.001041761029078721	0	0.012631725870612046
d__Bacteria;p__Pseudomonadota;c__Betaproteobacteria;o__Burkholderiales;f__Comamonadaceae;g__Variovorax	0	0	0	0.00013464386697185942	0	0	0	0	8.80266192496611e-05	0	0	0	0	0	0	0
d__Bacteria;p__Pseudomonadota;c__Betaproteobacteria;o__Burkholderiales;f__Oxalobacteraceae;g__Collimonas	0	9.133671279170662e-05	0	0	0	0	0	0	0	0	0	0	0	0	0	0
d__Bacteria;p__Pseudomonadota;c__Betaproteobacteria;o__Burkholderiales;f__Oxalobacteraceae;g__Duganella	0	0	0	0	0	0	0	0	0	0	0	0	0	0	0	0
d__Bacteria;p__Pseudomonadota;c__Betaproteobacteria;o__Burkholderiales;f__Oxalobacteraceae;g__Herbaspirillum	0.0006722237160527023	0.0029227748093346123	0.0017246583020739015	0.000942507068803016	0.0006723442402510085	0.00013674070922847854	0.000341040856694632	4.776005349125991e-05	7.042129539972888e-05	0.00021664861261561536	0.0014638041163946062	4.7729279526525546e-05	0.0002616978959489166	0.0009964670712926896	0.0007626540360454381	0.00013957708144322702
d__Bacteria;p__Pseudomonadota;c__Betaproteobacteria;o__Burkholderiales;f__Oxalobacteraceae;g__Herminiimonas	0.008380388993457022	0.0015527241174590125	0.0017246583020739015	0.000706880301602262	0.00015688032272523532	0.0002582880063204595	6.82081713389264e-05	0	0.00010563194309959333	0.0017165236230314142	0.0014638041163946062	0	0.0002616978959489166	0.00045293957786031344	0.00048167623329185567	0.0002442598925256473
d__Bacteria;p__Pseudomonadota;c__Betaproteobacteria;o__Burkholderiales;f__Oxalobacteraceae;g__Janthinobacterium	0.00022407457201756745	9.133671279170662e-05	0.00030181520286293276	0	6.723442402510085e-05	0.00012154729709198092	0	0	0	0	8.87154009936125e-05	0	0	0	0.00016055874443061857	0.00017447135180403378
d__Bacteria;p__Pseudomonadota;c__Betaproteobacteria;o__Burkholderiales;f__Oxalobacteraceae;g__Massilia	8.962982880702697e-05	9.133671279170662e-05	0.000646746863277713	0.00010098290022889458	0.0007171671896010757	6.077364854599046e-05	0	0	5.2815971549796656e-05	0	8.87154009936125e-05	0.003675154523542467	0.0002616978959489166	0.00013588187335809404	8.027937221530928e-05	0
d__Bacteria;p__Pseudomonadota;c__Betaproteobacteria;o__Burkholderiales;f__Oxalobacteraceae;g__Noviherbaspirillum	0	0	0	0	0	0	0.0004774571993724848	0	0	0	0	0	0	0	0	0
d__Bacteria;p__Pseudomonadota;c__Betaproteobacteria;o__Burkholderiales;f__Oxalobacteraceae;g__Solimicrobium	0	0	0	0	0	0	0	0	0	0	0	0	0	0	0.0002809778027535825	0
d__Bacteria;p__Pseudomonadota;c__Betaproteobacteria;o__Neisseriales;f__Aquaspirillaceae;g__Aquaspirillum	0	0	0	0	0	0	4.547211422595094e-05	0	0	0	0	0	0	0	0	0
d__Bacteria;p__Pseudomonadota;c__Betaproteobacteria;o__Neisseriales;f__Chromobacteriaceae;g__Chromobacterium	0	9.133671279170662e-05	0	0	4.482294935006723e-05	0	0	0	0	0	0	0	0	9.058791557206268e-05	0	0
d__Bacteria;p__Pseudomonadota;c__Betaproteobacteria;o__Neisseriales;f__Neisseriaceae;g__Conchiformibius	0	0	0	6.732193348592971e-05	0	0	0	0	0	0	0	0	0	0	0	0
d__Bacteria;p__Pseudomonadota;c__Betaproteobacteria;o__Neisseriales;f__Neisseriaceae;g__Neisseria	0	0	0	0	0	0	0	0	0	0	0	0	0	0	0	6.978854072161351e-05
d__Bacteria;p__Pseudomonadota;c__Betaproteobacteria;o__Neisseriales;f__Neisseriaceae;g__Prolinoborus	0	0	0	0	0	0	0	0	0	0	0	0	0	0	0	0
d__Bacteria;p__Pseudomonadota;c__Betaproteobacteria;o__Nitrosomonadales;f__Methylophilaceae;g__Methylophilus	0	0	0	0	0	0	0	0	0	0	0	0	0	0	0	0
d__Bacteria;p__Pseudomonadota;c__Betaproteobacteria;o__Nitrosomonadales;f__Nitrosomonadaceae;g__Nitrosomonas	0	0	0	0	0	0	0	0	0	0	0	0	0	0	0.0002809778027535825	0
d__Bacteria;p__Pseudomonadota;c__Betaproteobacteria;o__Nitrosomonadales;f__Sterolibacteriaceae;g__Sulfuritalea	0	0	0	0	0	0	0	0	0	0	0	0	0	0	0	0
d__Bacteria;p__Pseudomonadota;c__Betaproteobacteria;o__Nitrosomonadales;f__Sulfuricellaceae;g__Sulfurimicrobium	0	9.133671279170662e-05	0	0	0	0	0	7.164008023688987e-05	0	0	0	0	0	0	0	0
d__Bacteria;p__Pseudomonadota;c__Betaproteobacteria;o__Nitrosomonadales;f__Thiobacillaceae;g__Thiobacillus	0.0005377789728421619	0.0012787139790838926	0.0013797266416591212	0.001211794802746735	0.0007395786642761093	0.00016712753350147378	0.0005911374849373622	0.00011940013372814979	8.80266192496611e-05	0	0.0014638041163946062	0	0	0.0009058791557206269	0.0007225143499377836	0.0006280968664945216
d__Bacteria;p__Pseudomonadota;c__Betaproteobacteria;o__Rhodocyclales;f__Rhodocyclaceae;g__Propionivibrio	0	0	0	0	0	0	0	0	0	0	0	0	0	0	0	0
d__Bacteria;p__Pseudomonadota;c__Betaproteobacteria;o__Rhodocyclales;f__Zoogloeaceae;g__Azoarcus	0	0	0	0	6.723442402510085e-05	0	0	0	0	0	0	0	0	0	0	0
d__Bacteria;p__Pseudomonadota;c__Betaproteobacteria;o__Rhodocyclales;f__Zoogloeaceae;g__Zoogloea	0.00013444474321054048	0	8.623291510369507e-05	6.732193348592971e-05	6.723442402510085e-05	0	0	0.0011940013372814977	5.281597154979666e-05	0	0.000177430801987225	0	0	9.058791557206268e-05	0	0
d__Bacteria;p__Pseudomonadota;c__Gammaproteobacteria;o__Aeromonadales;f__Aeromonadaceae;g__Aeromonas	0	0	0	0	4.482294935006723e-05	1.5193412136497615e-05	0	0	0	0	0	0	0	0.00013588187335809404	0	0
d__Bacteria;p__Pseudomonadota;c__Gammaproteobacteria;o__Alteromonadales;f__Colwelliaceae;g__Colwellia	0	0	0	0	0	0	0	0	0	0	0	0	0	0.00013588187335809404	0	0
d__Bacteria;p__Pseudomonadota;c__Gammaproteobacteria;o__Alteromonadales;f__Pseudoalteromonadaceae;g__Pseudoalteromonas	0	0	0	0	0	7.596706068248807e-05	0	4.776005349125991e-05	0	9.999166736105325e-05	0	7.159391928978833e-05	0	0	0	0
d__Bacteria;p__Pseudomonadota;c__Gammaproteobacteria;o__Cellvibrionales;f__Cellvibrionaceae;g__Marinimicrobium	0	0	0	0.008078632018311566	8.964589870013447e-05	0	0	0	0	0	0	0	0	0	0	0.0027566473585037337
d__Bacteria;p__Pseudomonadota;c__Gammaproteobacteria;o__Cellvibrionales;f__Halieaceae;g__Haliea	0	0	0	0	0	0	0	0	0	0	0	0	0	0	0	0
d__Bacteria;p__Pseudomonadota;c__Gammaproteobacteria;o__Chromatiales;f__Chromatiaceae;g__Rheinheimera	0	0	0	0	0	0	0	0	0	0	0	0	0	0	0	0
d__Bacteria;p__Pseudomonadota;c__Gammaproteobacteria;o__Chromatiales;f__Chromatiaceae;g__Thiocystis	0	0	0	0	0	0	0	0	0	0	0	0	0	0	0	0
d__Bacteria;p__Pseudomonadota;c__Gammaproteobacteria;o__Chromatiales;f__Ectothiorhodospiraceae;g__Alkalilimnicola	0	0	0	0	0	0	0	0	0	0	0	0	0	0	0	0
d__Bacteria;p__Pseudomonadota;c__Gammaproteobacteria;o__Enterobacterales;f__Enterobacteriaceae;g__Citrobacter	0	9.133671279170662e-05	0	0	0	0.049287428970798276	0	0.10755564046231732	0.0803330927272407	0.05162903091409049	0	0.07918287473450589	0.0322935203600963	0	0	0.09086468001954078
d__Bacteria;p__Pseudomonadota;c__Gammaproteobacteria;o__Enterobacterales;f__Enterobacteriaceae;g__Enterobacter	0	0	0	0	0	0.007809413838159774	0	0.019533861877925305	0.010721642224608722	0.01854845429547538	0	0.012433477316659907	0.010834292892285146	0	0	0.02215786167911229
d__Bacteria;p__Pseudomonadota;c__Gammaproteobacteria;o__Enterobacterales;f__Enterobacteriaceae;g__Escherichia	0	0	0	0	0	0	4.547211422595094e-05	0.00011940013372814979	7.042129539972888e-05	0	0	0	0	0	0.00016055874443061857	0
d__Bacteria;p__Pseudomonadota;c__Gammaproteobacteria;o__Enterobacterales;f__Enterobacteriaceae;g__Klebsiella	0	0	0	0	0	0	0	0	0	9.999166736105325e-05	0	0	0	0.00013588187335809404	0	0.00010468281108242027
d__Bacteria;p__Pseudomonadota;c__Gammaproteobacteria;o__Enterobacterales;f__Enterobacteriaceae;g__Kluyvera	0	0	0	0	0	0	0	0	0	0	0	0	0	0	0	0.00013957708144322702
d__Bacteria;p__Pseudomonadota;c__Gammaproteobacteria;o__Enterobacterales;f__Enterobacteriaceae;g__Lelliottia	0	0	0	0	0	0	0	0	0	0	0	0	0	9.058791557206268e-05	0	0
d__Bacteria;p__Pseudomonadota;c__Gammaproteobacteria;o__Enterobacterales;f__Enterobacteriaceae;g__Salmonella	0	0	0	0	0	0	0.0002046245140167792	0	0	0	0	0	0	0	0	0
d__Bacteria;p__Pseudomonadota;c__Gammaproteobacteria;o__Enterobacterales;f__Enterobacteriaceae;g__Shigella	0	0	0	0	0	0	0	0	0	0.001466544454628781	0	0.0021716822184569126	0.0015178477965037162	0.004257632031886948	0	0
d__Bacteria;p__Pseudomonadota;c__Gammaproteobacteria;o__Enterobacterales;f__Erwiniaceae;g__Erwinia	0	0	0	0	0	0	0	0	0	3.333055578701775e-05	0	0	0	0	0	0
d__Bacteria;p__Pseudomonadota;c__Gammaproteobacteria;o__Enterobacterales;f__Erwiniaceae;g__Pantoea	0	0	8.623291510369507e-05	0	0	0.005104986477863198	4.547211422595094e-05	0.0176950998185118	0.013872995193746589	0.010599116740271645	0	0.01713481135002267	0.006280749502773997	0	0.0003211174888612371	0.005583083257729082
d__Bacteria;p__Pseudomonadota;c__Gammaproteobacteria;o__Enterobacterales;f__Hafniaceae;g__Hafnia	0	0	0	0	8.964589870013447e-05	6.077364854599046e-05	0.0003183047995816566	0	0	9.999166736105325e-05	0	7.159391928978833e-05	0.00015701873756934995	9.058791557206268e-05	0	6.978854072161351e-05
d__Bacteria;p__Pseudomonadota;c__Gammaproteobacteria;o__Enterobacterales;f__Morganellaceae;g__Morganella	0	0	0.00021558228775923769	0	0	0	0	0	3.521064769986444e-05	0	8.87154009936125e-05	0	0	0	0.0003211174888612371	0
d__Bacteria;p__Pseudomonadota;c__Gammaproteobacteria;o__Enterobacterales;f__Morganellaceae;g__Proteus	0	0	0	0	0	0	0	9.552010698251981e-05	0	0	0	0	0	0	8.027937221530928e-05	0
d__Bacteria;p__Pseudomonadota;c__Gammaproteobacteria;o__Enterobacterales;f__Morganellaceae;g__Providencia	0	0	0	0	0	0	0	0	0	0	0	0	0	0	0	6.978854072161351e-05
d__Bacteria;p__Pseudomonadota;c__Gammaproteobacteria;o__Enterobacterales;f__Morganellaceae;g__Xenorhabdus	0.0017029667473335126	0	0.00017246583020739015	0	4.482294935006723e-05	9.11604728189857e-05	0.00011368028556487734	7.164008023688987e-05	3.521064769986444e-05	0.0001499875010415799	0	4.7729279526525546e-05	0	9.058791557206268e-05	0.0002809778027535825	0.0002442598925256473
d__Bacteria;p__Pseudomonadota;c__Gammaproteobacteria;o__Enterobacterales;f__Pectobacteriaceae;g__Lonsdalea	0	0	0	0	0	0	0	0	0	0	0	0	0	9.058791557206268e-05	0	0
d__Bacteria;p__Pseudomonadota;c__Gammaproteobacteria;o__Enterobacterales;f__Pectobacteriaceae;g__Pectobacterium	0	0	0	0	0.0001344688480502017	0	0	0	0	0	0	0	0	0	0	0
d__Bacteria;p__Pseudomonadota;c__Gammaproteobacteria;o__Enterobacterales;f__Yersiniaceae;g__Rahnella	0.002106300976965134	0.0024204228889802256	0.00978743586426939	0	0.003563424473330345	0.0020055304020176854	0.029693290589545954	0.0006686407488776388	0.0015140578510941707	0.0004499625031247396	0.009226401703335699	0.0016466601436651313	0.0014655082173139328	0.00670350575233264	0.007666680046562035	0.0036638983878847097
d__Bacteria;p__Pseudomonadota;c__Gammaproteobacteria;o__Enterobacterales;f__Yersiniaceae;g__Serratia	8.962982880702697e-05	9.133671279170662e-05	0	0	6.723442402510085e-05	6.077364854599046e-05	0.0001364163426778528	4.776005349125991e-05	0	0	0.00013307310149041873	0	0	0	0	0
d__Bacteria;p__Pseudomonadota;c__Gammaproteobacteria;o__Enterobacterales;f__Yersiniaceae;g__Yersinia	0	0	0	0	0	4.558023640949285e-05	0.0001364163426778528	0	0	0	8.87154009936125e-05	0	0	0	0	6.978854072161351e-05
d__Bacteria;p__Pseudomonadota;c__Gammaproteobacteria;o__Legionellales;f__Coxiellaceae;g__Candidatus Berkiella	0	0	0	0	0	0	0	0	0	0	0	0	0	0	0	0
d__Bacteria;p__Pseudomonadota;c__Gammaproteobacteria;o__Legionellales;f__Legionellaceae;g__Legionella	0	0	0	0	0	0	0	0	0	0	0	0	0	0	0	0
d__Bacteria;p__Pseudomonadota;c__Gammaproteobacteria;o__Moraxellales;f__Moraxellaceae;g__Acinetobacter	0.003764452809895133	0.013106818285609903	0.0009485620661406459	0.039215026255554064	0.016203496190049307	0.007368804886201345	2.273605711297547e-05	0.0038685643327920527	3.521064769986444e-05	0.00014998750104157986	8.87154009936125e-05	0.0004534281555019927	0.007065843190620747	0.02925989672977625	0.002087263677598041	0.006839276990718125
d__Bacteria;p__Pseudomonadota;c__Gammaproteobacteria;o__Moraxellales;f__Moraxellaceae;g__Moraxella	0	0	0	0.000235626767200754	0	0	0	0	0	0	0	0	0	0	0	0
d__Bacteria;p__Pseudomonadota;c__Gammaproteobacteria;o__Moraxellales;f__Moraxellaceae;g__Psychrobacter	0	0	0	0.0005722364346304026	0	0	0	0	0	0.00023331389050912425	0	0.0020523590196405987	0	0	0	6.978854072161351e-05
d__Bacteria;p__Pseudomonadota;c__Gammaproteobacteria;o__Nevskiales;f__Nevskiaceae;g__Nevskia	0	0	0	0	0	0	0	0	0	0	0	0	0	0	0	0
d__Bacteria;p__Pseudomonadota;c__Gammaproteobacteria;o__Nevskiales;f__Steroidobacteraceae;g__Steroidobacter	0	0	0	0	0	0	0	0	0	0	0	0	0	0	0	0
d__Bacteria;p__Pseudomonadota;c__Gammaproteobacteria;o__Oceanospirillales;f__Alcanivoracaceae;g__Alcanivorax	0	0	0	0	0	0	0	0	0	0	0	0	0	0	0	0
d__Bacteria;p__Pseudomonadota;c__Gammaproteobacteria;o__Oceanospirillales;f__Halomonadaceae;g__Halomonas	0	0.0025574279581677857	0	0	4.482294935006723e-05	0	0	0	1.760532384993222e-05	0	0	0	0	0	0	0
d__Bacteria;p__Pseudomonadota;c__Gammaproteobacteria;o__Oceanospirillales;f__Oceanospirillaceae;g__Marinobacterium	0	0	0	0	0	0	0	0	0	0	0	0	0	0	0	0
d__Bacteria;p__Pseudomonadota;c__Gammaproteobacteria;o__Pasteurellales;f__Pasteurellaceae;g__Aggregatibacter	0	0	0	0	0	0	0	0	0	0	0	0	0	0	0	0
d__Bacteria;p__Pseudomonadota;c__Gammaproteobacteria;o__Pasteurellales;f__Pasteurellaceae;g__Pasteurella	0	0	0	0	0	0.001063538849554833	0	0	0	0	0	0	0	0	0	0
d__Bacteria;p__Pseudomonadota;c__Gammaproteobacteria;o__Pseudomonadales;f__Marinobacteraceae;g__Marinobacter	0	9.133671279170662e-05	0	0	0	0	0	0	0	0	0	0	0	0	0	0
d__Bacteria;p__Pseudomonadota;c__Gammaproteobacteria;o__Pseudomonadales;f__Pseudomonadaceae;g__Halopseudomonas	0	0	0	0	0	0	0	0	0	0	0	0	0	0	0	0
d__Bacteria;p__Pseudomonadota;c__Gammaproteobacteria;o__Pseudomonadales;f__Pseudomonadaceae;g__Pseudomonas	0.009321502195930807	0.0228798465543225	0.002500754538007157	0.0005049145011444728	0.005916629314208875	0.44680786411012186	6.82081713389264e-05	0.4262823574362404	0.4839703526346366	0.43929672527289404	0.0019517388218594747	0.46395246163759174	0.37045954150528637	0.00018117583114412537	0.015172801348693457	0.34643031614208947
d__Bacteria;p__Pseudomonadota;c__Gammaproteobacteria;o__Pseudomonadales;f__Pseudomonadaceae;g__Stutzerimonas	0	0	8.623291510369507e-05	0	0	0.03708711902519067	0	0.021372623937338808	0.02315100086266087	0.02158153487209399	0	0.02107247691096103	0.021563906626190725	0	0	0.021669341894060994
d__Bacteria;p__Pseudomonadota;c__Gammaproteobacteria;o__Salinisphaerales;f__Salinisphaeraceae;g__Salinisphaera	0	0	0	0	2.2411474675033616e-05	0	0	0	0	0	0	0	0	0	0	0
d__Bacteria;p__Pseudomonadota;c__Gammaproteobacteria;o__Vibrionales;f__Vibrionaceae;g__Aliivibrio	0	0	0	0	0	3.038682427299523e-05	0	0	0	0	0	0	0	0	0	0
d__Bacteria;p__Pseudomonadota;c__Gammaproteobacteria;o__Vibrionales;f__Vibrionaceae;g__Photobacterium	0	0	0	0	0	0	0	0	0	0	0	0	0	0	0	0
d__Bacteria;p__Pseudomonadota;c__Gammaproteobacteria;o__Vibrionales;f__Vibrionaceae;g__Vibrio	0	0	0	0	0	4.558023640949285e-05	0	0	0	0	0	0	0	0	0	0
d__Bacteria;p__Pseudomonadota;c__Gammaproteobacteria;o__Xanthomonadales;f__Rhodanobacteraceae;g__Dyella	0	0	0	0	0	0	0	0	0	0	0	0	0	0	0	0
d__Bacteria;p__Pseudomonadota;c__Gammaproteobacteria;o__Xanthomonadales;f__Rhodanobacteraceae;g__Luteibacter	0	0	0	0	0	0	0	0	0	0	0	0	0	0	0	0
d__Bacteria;p__Pseudomonadota;c__Gammaproteobacteria;o__Xanthomonadales;f__Xanthomonadaceae;g__Arenimonas	0	0	0	0	0	0	0	0	0	0	0	0	0	0	0	0
d__Bacteria;p__Pseudomonadota;c__Gammaproteobacteria;o__Xanthomonadales;f__Xanthomonadaceae;g__Lysobacter	0	0	0	0	0	0	0	0	0	0	8.87154009936125e-05	0	0	0	0	0
d__Bacteria;p__Pseudomonadota;c__Gammaproteobacteria;o__Xanthomonadales;f__Xanthomonadaceae;g__Pseudoxanthomonas	0	0	0	0	0	0	0	0	0	0	0	0	0	0	0	0
d__Bacteria;p__Pseudomonadota;c__Gammaproteobacteria;o__Xanthomonadales;f__Xanthomonadaceae;g__Stenotrophomonas	0	0	0	6.732193348592971e-05	0	0	0	0.001504441684974687	0	0	0.002528388928317956	0	0	0	0	3.4894270360806756e-05
d__Bacteria;p__Pseudomonadota;c__Gammaproteobacteria;o__Xanthomonadales;f__Xanthomonadaceae;g__Xanthomonas	0	0	0	0	0	0.001808016044243216	0	0.002507402808291145	0	0.0024831264061328222	0	0	0	0	0	0.00129108800334985
d__Bacteria;p__Thermodesulfobacteriota;c__Desulfobacteria;o__Desulfobacterales;f__Desulfobacteraceae;g__Desulfospira	0	0	0	0	0	0	0	0	0	0	0	0	0	0	0	0
d__Bacteria;p__Thermodesulfobacteriota;c__Desulfobacteria;o__Desulfobacterales;f__Desulfococcaceae;g__Desulfococcus	0	0	0	0	0	0	0	0	0	0	0	0	0	0	0	0
d__Bacteria;p__Thermodesulfobacteriota;c__Desulfobulbia;o__Desulfobulbales;f__Desulfocapsaceae;g__Desulforhopalus	0	0	0	0	0	0	0	0	0	0	0	0	0	0	0	0
d__Bacteria;p__Thermodesulfobacteriota;c__Desulfovibrionia;o__Desulfovibrionales;f__Desulfomicrobiaceae;g__Desulfomicrobium	0	0	0	0	0	0	0	0	0	0	0	0	0	0	0	0
d__Bacteria;p__Thermodesulfobacteriota;c__Desulfovibrionia;o__Desulfovibrionales;f__Desulfovibrionaceae;g__Desulfovibrio	0	0	0	0	0	0	0	0	0	0	0	0	0	0	0	0
d__Bacteria;p__Thermodesulfobacteriota;c__Desulfuromonadia;o__Desulfuromonadales;f__Desulfuromonadaceae;g__Desulfuromonas	0	0	8.623291510369507e-05	0	0	0	0	0	0	0	0	0	0	0	0	0
d__Bacteria;p__Thermodesulfobacteriota;c__Desulfuromonadia;o__Geobacterales;f__Geobacteraceae;g__Geobacter	0	0	0	0	0	0	0	0	0	0	0	9.545855905305109e-05	0	0	0	0
d__Bacteria;p__Thermodesulfobacteriota;c__Syntrophorhabdia;o__Syntrophorhabdales;f__Syntrophorhabdaceae;g__Syntrophorhabdus	0	0	0.009528737118958306	0	0	0	0	0	0	0	0	0	0	0	0	0
d__Bacteria;p__Verrucomicrobiota;c__Verrucomicrobiae;o__Verrucomicrobiales;f__Akkermansiaceae;g__Akkermansia	0	0	0	0	0	0	0	0	0	0	0	0	0	0	0	0
d__Bacteria;p__Verrucomicrobiota;c__Verrucomicrobiae;o__Verrucomicrobiales;f__Verrucomicrobiaceae;g__Haloferula	0	0	0	0	0	0	0	0.0016477218454484669	0	0	0	0	0.0012561499005547996	0	0	0

## Sheet: Table S3
Table S3. The relative abundance of the 30 most abundant phyla within the lung microbiome among the three mice groups
ID	Ctrl	BLM	BLM+Lido
Pseudomonadota	0.509314	0.811319	0.646066
Bacteroidota	0.444963	0.125261	0.271706
Bacillota	0.0296324	0.0597067	0.0793715
Actinomycetota	0.0122615	0.00215525	0.00066065
Cyanobacteriota	0.00181127	0.0001489	1.479e-05
Thermodesulfobacteriota	0.00192299	0	1.591e-05
Campylobacterota	0	0.00061994	0.00092594
Myxococcota	4.312e-05	0	0.00057665
Verrucomicrobiota	0	0.00032954	0.00020936
Deinococcota	0	0.0003833	0
Acidobacteriota	0	0	0.00027354
Chloroflexota	0	6.989e-05	0.00018029
Chlamydiota	5.174e-05	0	0
Mycoplasmatota	0	6.67e-06	0
Planctomycetota	0	0	0
Gemmatimonadota	0	0	0
Nitrospirota	0	0	0

## Sheet: Table S4
Table S4. The relative abundance of the 30 most abundant genera within the lung microbiome among the three mice groups
ID	Ctrl	BLM	BLM+Lido
Epilithonimonas	0.435918	0.12463	0.270373
Burkholderia	0.291195	0.259009	0.251224
Pseudomonas	0.00822473	0.359285	0.199691
Sphingomonas	0.161575	0.0582326	0.0975354
Citrobacter	1.827e-05	0.057761	0.0337235
Niallia	0	0.0452203	0.0217768
Stutzerimonas	1.725e-05	0.0206385	0.0107176
Rhodoferax	4.567e-05	0.0195436	0.0115621
Acinetobacter	0.0146477	0.00228906	0.0076324
Bacillus	0.0158574	0.00069431	0.00676958
Kurthia	0.00318003	0	0.0189267
Enterobacter	0	0.0113227	0.00757094
Rahnella	0.00357552	0.0068663	0.00506211
Pantoea	1.725e-05	0.00946353	0.00488663
Carnobacterium	0	0.00124433	0.0107075
Ralstonia	0.00470147	0.00166456	0.00469272
Blautia	4.485e-05	0.00555013	0.00387112
Streptococcus	0	0	0.0079038
Chryseobacterium	0.0041657	0.00055238	0.0009321
Staphylococcus	0.00048342	0.0004163	0.00389958
Others	0.0563327	0.0156169	0.0205416

## Sheet: Table S5
Table S5. Random forest plot of differential lung microbiota
ID	Ctrl	BLM	BLM+Lido
Burkholderia	-0.512327	1.3977153691700903	-0.885389
Pseudomonas	-1.03065	1.3539688381778139	-0.323323
Achromobacter	1.4062554795478266	-0.573381	-0.832874
Thiobacillus	1.3573171584111683	-1.02256	-0.334758
Caballeronia	1.4100418318615269	-0.799024	-0.611018
Herminiimonas	1.3460187998382553	-0.297277	-1.04874
Lysinibacillus	-0.762703	1.412716156527095	-0.650013
Chryseobacterium	1.4059893895233218	-0.571103	-0.834886
Herbaspirillum	1.386555394956668	-0.934313	-0.452242
Pantoea	-1.07014	1.3357555674483519	-0.265612
Sphingomonas	1.3887061531826483	-0.46279	-0.925916
Acinetobacter	1.4035411127497106	-0.851951	-0.55159
Rhodoferax	-1.06615	1.3377443504797235	-0.271594
Niallia	-0.989678	1.3697121670186083	-0.380034
Epilithonimonas	1.4125723535832302	-0.765274	-0.647299
Massilia	-0.229036	-1.09406	1.3230945516324868
Stutzerimonas	-1.00036	1.3658941672439833	-0.365536
Mesorhizobium	1.4142135623730954	-0.707107	-0.707107
Hafnia	-0.944158	1.3839035466499263	-0.439745
Citrobacter	-1.0897	1.3255010466261297	-0.235802

## Sheet: Table S6
Table S6. Description of KEGG metabolic pathway of lung microbiota in mice
Level1	Level2	Ctrl-1	Ctrl-2	Ctrl-3	Ctrl-4	Ctrl-5	BLM-1	BLM-2	BLM-3	BLM-4	BLM-5	BLM+Lido-1	BLM+Lido-2	BLM+Lido-3	BLM+Lido-4	BLM+Lido-5	BLM+Lido-6
Cellular Processes	Cell growth and death	633.92	624.28	629.84	652.92	661.92	449.39	645.16	428.22	437.4	451.92	604.08	436.39	485.86	631.39	639.77	452.62
Cellular Processes	Cell motility	1123.55	1123.82	1403.02	1140.53	1079.81	1433.3	1331.84	1397.83	1419.25	1381.02	1291.68	1434.47	1400.83	1019.84	1073.9	1336.93
Cellular Processes	Cellular community - eukaryotes	0	0	0	0	0	0	0	0	0	0	0	0	0	0	0	0
Cellular Processes	Cellular community - prokaryotes	61.26	64.09	67.14	60.85	60.65	140.78	67.76	136.63	143.64	139.78	68.22	143	129.57	60.14	63.88	126.79
Cellular Processes	Transport and catabolism	189.26	187.56	169.3	205.84	197.55	160.13	181.32	153.16	155.22	155	166.12	153.67	168.38	183.82	185.43	158.38
Environmental Information Processing	Membrane transport	532.86	596.2	602.46	581.02	561.99	822.48	585.64	838.72	835.21	806.16	619.8	843.29	797.43	597.69	638.67	800.24
Environmental Information Processing	Signal transduction	208.69	206.18	234.49	203.17	192.45	264.17	224.04	269.22	264.69	256.48	215.56	265.34	255.39	195.83	199.01	257.75
Environmental Information Processing	Signaling molecules and interaction	0	0.05	0.01	0	0	0	0	0	0	0	0	0	0	0	0	0
Genetic Information Processing	Folding, sorting and degradation	1181.51	1167.47	1193.8	1193.45	1185.48	1037.66	1175.07	1011.8	1019.96	1030.45	1144.95	1022.74	1057.93	1172.98	1138.61	1026.97
Genetic Information Processing	Replication and repair	2389.81	2299.46	2219.94	2366.59	2439.76	1682.2	2298.88	1628.29	1651.75	1694.68	2223.25	1642.3	1784.5	2369.02	2364.68	1720.3
Genetic Information Processing	Transcription	384.17	374.39	371.88	371.57	384.97	239.29	370.62	226.59	229.78	241.88	365.04	229.97	258.1	364.62	370.83	241.9
Genetic Information Processing	Translation	1073.66	1038.53	1014.57	1071.32	1091.97	799.4	1028.9	777.43	783.84	809.01	1048.9	787.16	841.52	1092.59	1061.3	812.47
Human Diseases	Cardiovascular diseases	0	0	0	0	0	0	0	0	0	0	0	0	0	0	0	0
Human Diseases	Drug resistance	1.54	5.12	8.62	0.72	2.17	7.7	0	4.11	4.88	3.69	2.22	5.69	4.64	17.34	3.14	2.62
Human Diseases	Immune diseases	0	0.04	0	0.04	0.07	0.02	0	0.01	0	0	0	0	0.02	0.2	0	0.02
Human Diseases	Infectious diseases	54.81	60.98	54.51	59.64	61.3	92.49	47.27	91.35	92.88	87.87	52.62	91.85	88	67.55	66.3	88.02
Human Diseases	Neurodegenerative diseases	0	0	0	0	0	0	0	0	0	0	0	0	0	0	0	0
Metabolism	Amino acid metabolism	5267.66	5376.31	5010.95	5420.05	5520.03	4416.3	5147.96	4304.07	4313.98	4356.94	5136.29	4320.5	4594.54	5286.75	5278.48	4399.4
Metabolism	Biosynthesis of other secondary metabolites	885.51	791.63	709.7	791.89	833.56	657.45	753.56	633.22	653.33	680.07	724.33	651.04	685.9	806.31	798.75	654.78
Metabolism	Carbohydrate metabolism	4734.21	4999.93	4825.93	5047.14	5097.18	4316.89	4872.7	4336.78	4350.99	4381.89	4929.56	4346.55	4431.2	4980.71	5026.87	4417.69
Metabolism	Energy metabolism	2139.64	2291.36	2192.53	2331.43	2192.29	1881.67	2100.97	1753.25	1758.28	1779.98	2147.89	1749.84	1833.81	2110.94	2103.82	1804.1
Metabolism	Glycan biosynthesis and metabolism	1304.91	1222.56	1237.39	1324.62	1320.46	992.94	1274.02	989.47	1013.62	1080.65	1140.57	1004.48	1054.53	1261.13	1277.82	1039.83
Metabolism	Lipid metabolism	2694.2	2817.17	2635.3	2923.37	2851.86	2576.87	2675.32	2476.19	2503.87	2548.61	2750.35	2499.57	2636.14	2718.22	3018.97	2495.37
Metabolism	Metabolism of cofactors and vitamins	5013.88	4874.95	4864.59	5053.29	5085.11	4059.14	4932.05	3990.74	4022.22	4117.01	4699.48	3996.76	4202.72	4854.57	4798.17	4114.81
Metabolism	Metabolism of other amino acids	3802.02	3643.57	3639.39	3260.93	3707.96	2552.53	3282.39	2485.89	2257.31	2540.44	3141.89	2471.51	2446.16	3326.85	3702.51	2627.67
Metabolism	Metabolism of terpenoids and polyketides	3118.5	2963.09	2693.66	3003.12	3148.16	2397.54	2854.98	2202.24	2222.04	2268.79	2685.25	2239.82	2392.9	3058.7	3010.14	2301.76
Metabolism	Nucleotide metabolism	707.94	688.26	657.06	699.3	719.45	532.96	676.02	523.43	527.12	539.1	687.14	527.18	556.54	715.14	701.82	547.06
Metabolism	Xenobiotics biodegradation and metabolism	1712.94	2398.58	2291.89	2294.53	2386.62	2808.26	1068.52	2150.26	1569.23	2439.29	1084.74	2491.57	1655.27	2295.3	1527.72	2561.13
Organismal Systems	Development	0	0	0	0	0.09	0	0	0	0	0	0	0	0	0.03	0	0
Organismal Systems	Digestive system	38.57	34.03	28.06	37.32	42.45	4.37	34.88	3.81	4.43	7.48	28.72	3.38	9.65	35.89	38.4	8.86
Organismal Systems	Endocrine system	49.72	52.31	49.85	57.32	60.11	27.28	54.94	27.26	28.05	30.6	49.27	27.32	32.91	52.32	55.98	31.15
Organismal Systems	Environmental adaptation	65.27	62.83	71.21	67.87	65.36	75.85	71.15	74.75	75.65	75.55	73.9	76.82	75.87	63.91	68.34	73.14
Organismal Systems	Immune system	0	19.79	0	0	0	0	0	0	0	0	0	0	0	0	0	0

## Sheet: Table S7
Table S7. The differential metabolites of all groups
ID	BLM vs BLM+Lido_de	BLM vs BLM+Lido_vip	BLM vs BLM+Lido_fc	BLM vs BLM+Lido_pvalue	Ctrl vs BLM_de	Ctrl vs BLM_vip	Ctrl vs BLM_fc	Ctrl vs BLM_pvalue	Name	mz	rt	exact_mass	ppm	formula	precursor_type	class	sub_class	KEGG	KEGG_Pathway	CAS	hmdb
M101T43.neg	Nodiff	0.019675885932525	0.975604064435383	0.987965186096041	Nodiff	0.446602353104662	0.443267903626374	0.503222920820618	2-Ketobutyric acid	101.025	42.6	102.032	2.73200514329168	C4H6O3	[M-H]-	Keto acids and derivatives	Short-chain keto acids and derivatives	C00109	Carbohydrate metabolism; Amino acid metabolism	600-18-0	HMDB0000005
M102T635.pos	Nodiff	0.231393913319188	0.819297483031008	0.890262570186159	Nodiff	0.386509707934992	1.64612692720167	0.656537827569967	Triethylamine	102.128	635.5	101.12	3.23690759869933	C6H15N	[M+H]+	Amines	Tertiary amines	C14691		121-44-8	HMDB0032539
M103T54.neg	Nodiff	0.622595982811495	1.11225935848942	0.444243472471748	Nodiff	0.470984396807274	1.06352159731283	0.484818133220286	Malonate	102.957	54.1	104.011	13.8580265664047	C3H4O4	[M-H]-			C00383	Lipid metabolism; Metabolism of other amino acids; Nucleotide metabolism	141-82-2 / 156-80-9
M104T70.pos	Nodiff	0.235862441612525	1.05186446215466	0.797907504091239	Nodiff	0.834318620405142	1.14197862060311	0.295687410670593	4-Hydroxybutanoic acid	104.053	70	104.047	2.37210830969219	C4H8O3	[M]+			C00989	Carbohydrate metabolism	591-81-1
M105T43.neg	Nodiff	1.25504042974993	0.940640222852983	0.123129609347748	Nodiff	0.388696231372681	0.977109104237311	0.564193214915423	Glyceric acid	105.02	43.5	106.027	2.62808085347401	C3H6O4	[M-H]-	Organooxygen compounds	Carbohydrates and carbohydrate conjugates	C00258	Carbohydrate metabolism; Amino acid metabolism; Lipid metabolism	473-81-4	HMDB0000139
M107T251.neg	Nodiff	0.177797142126693	1.09759424891585	0.836307170255425	Nodiff	0.21002803608991	1.36504299278883	0.759608310250488	o-Cresol	107.05	251.3	108.058	2.57822242772802	C7H8O	[M-H]-	Phenols	Cresols	C01542		95-48-7	HMDB0002055
M109T410.pos	Nodiff	1.24547989701181	1.34405196385649	0.261730425712354	Nodiff	0.387177932828386	0.654780012189852	0.608745697581994	m-Cresol	109.022	410.2	108.058	2.51838656091096	C7H8O	[M+H]+	Phenols	Cresols	C01467		108-39-4	HMDB0002048
M110T368.pos	Nodiff	0.725507526842958	1.55841704466607	0.481817556052187	Nodiff	0.695419139861096	0.922891562825687	0.422083309517653	Hydroquinone	110.02	367.6	110.037	0.480341128632143	C6H6O2	[M]+	Phenols	Benzenediols	C00530	Amino acid metabolism	123-31-9	HMDB0002434
M110T38.pos	Nodiff	0.513754830530268	1.06481305084166	0.542024551233696	Nodiff	0.721817438022552	2.84168976739441	0.37515994562568	2-Aminophenol	110.019	37.6	109.053	9.17519237080725	C6H7NO	[M+H]+			C01987	Amino acid metabolism	95-55-6
M110T455.pos	Nodiff	0.427805902562821	0.831121082561129	0.662594847599614	Nodiff	0.185278696079412	1.35242672283015	0.856525340178041	Catechol	110.02	454.7	110.037	4.30106581721469	C6H6O2	[M]+			C00090		120-80-9 / 12385-08-9
M111T69.neg	Nodiff	0.937630168168875	1.21880905479756	0.318113853300252	Nodiff	0.579272845879675	1.41348660130756	0.380078399825536	Uracil	111.02	68.6	112.027	3.38676495480657	C4H4N2O2	[M-H]-	Diazines	Pyrimidines and pyrimidine derivatives	C00106	Metabolism of cofactors and vitamins; Metabolism of other amino acids; Nucleotide metabolism	66-22-8	HMDB0000300
M113T355.pos	Nodiff	1.28237907405501	1.30312203725274	0.173610749270506	Nodiff	0.889866412518361	1.34058705897774	0.247091092573045	(R)-Pantolactone	113.107	355.5	130.063	2.35188524359692	C6H10O3	[M+H-H2O]+			C01012		599-04-2
M114T187.pos	Nodiff	0.795718480081745	2.10520873117675	0.390633767222485	Nodiff	0.048710795551751	0.807083149596498	0.933617467954907	Creatinine	113.964	187.1	113.059	1.38057763753607	C4H7N3O	[M+H]+	Carboxylic acids and derivatives	Amino acids, peptides, and analogues	C00791	Amino acid metabolism	60-27-5	HMDB0000562
M114T210.pos	Nodiff	1.20208515594491	0.677121123922133	0.16806186140428	Nodiff	0.556463414748315	0.887607790062906	0.461460708865372	Dihydrouracil	114.092	209.6	114.043	5.41250842512259	C4H6N2O2	[M]+	Diazines	Pyrimidines and pyrimidine derivatives	C00429	Metabolism of cofactors and vitamins; Metabolism of other amino acids; Nucleotide metabolism	504-07-4	HMDB0000076
M114T440.pos	Nodiff	0.127254096467002	0.938289072468895	0.87535279671087	Nodiff	0.0579605175320496	1.21027080938277	0.966109175124789	Epsilon-caprolactam	114.091	439.5	113.084	0.119014763563226	C6H11NO	[M+H]+	Lactams	Caprolactams	C06593		105-60-2	HMDB0062769
M115T43_1.neg	Nodiff	0.504962112791901	0.917897380760504	0.575614610669088	Nodiff	0.401715139027916	1.0752574913988	0.573530385650654	Fumaric acid	115.004	42.6	116.011	3.26944865434022	C4H4O4	[M-H]-	Carboxylic acids and derivatives	Dicarboxylic acids and derivatives	C00122	Cancer: overview; Metabolism of cofactors and vitamins; Endocrine system; Carbohydrate metabolism; Cancer: specific types; Amino acid metabolism; Energy metabolism	110-17-8	HMDB0000134
M116T52.pos	Nodiff	1.1459954901986	1.31770556197611	0.231967207344391	Nodiff	0.627095220734872	0.892718421282018	0.472254807450715	L-Proline	116.071	52.2	115.063	0.076560096856674	C5H9NO2	[M+H]+	Carboxylic acids and derivatives	Amino acids, peptides, and analogues	C00148	Cancer: overview; Membrane transport; Digestive system; Translation; Amino acid metabolism	147-85-3	HMDB0000162
M117T54.neg	Up	1.67641104835828	1.51689790468303	0.0254686606339398	Down	1.58783492197823	0.488775605800146	0.00214170489220143	Succinic acid	117.056	54.2	118.027	12.9863210577845	C4H6O4	[M-H]-	Carboxylic acids and derivatives	Dicarboxylic acids and derivatives	C00042	Cancer: overview; Metabolism of cofactors and vitamins; Nervous system; Signal transduction; Endocrine system; Carbohydrate metabolism; Amino acid metabolism; Energy metabolism	110-15-6	HMDB0000254
M117T582.neg	Nodiff	1.23398244645205	0.437974180339269	0.196050393603455	Up	1.41694720644519	4.58389931098063	0.0199150584710354	Methylmalonic acid	116.929	582.4	118.027	13.971100753482	C4H6O4	[M-H]-	Carboxylic acids and derivatives	Dicarboxylic acids and derivatives	C02170	Carbohydrate metabolism; Amino acid metabolism; Nucleotide metabolism	516-05-2	HMDB0000202
M117T689.neg	Nodiff	0.0954570753616106	0.95169040330646	0.911702356124245	Nodiff	0.710511595640715	0.774923315229641	0.292943394778699	Betaine	116.928	688.7	117.079	9.72666772140896	C5H11NO2	[M]-	Carboxylic acids and derivatives	Amino acids, peptides, and analogues	C00719	Amino acid metabolism; Membrane transport	107-43-7 / 590-46-5	HMDB0000043
M118T55.pos	Nodiff	0.377919658675009	1.16173256044373	0.707112589339113	Down	1.92028755539716	0.368503472605363	0.00312418149092251	L-Valine	118.087	54.7	117.079	3.3873416735252	C5H11NO2	[M+H]+	Carboxylic acids and derivatives	Amino acids, peptides, and analogues	C00183	Cancer: overview; Metabolism of cofactors and vitamins; Membrane transport; Digestive system; Translation; Amino acid metabolism	72-18-4	HMDB0000883
M119T112.neg	Nodiff	0.77358384712816	1.3180776949522	0.367923836418498	Down	1.71387288844528	0.251559215839486	0.000425112371436119	3-Methylthiopropionic acid	118.993	112.1	120.025	22.0237031085923	C4H8O2S	[M-H]-	Fatty Acyls	Fatty acids and conjugates	C08276	Energy metabolism; Amino acid metabolism	646-01-5	HMDB0001527
M119T44.neg	Nodiff	0.180904061363677	0.836871429393014	0.829084509650196	Nodiff	0.239408012600171	1.32606212454744	0.744806008972196	L-Erythrulose	119.035	43.7	120.042	3.15872421135736	C4H8O4	[M-H]-	Organooxygen compounds	Carbohydrates and carbohydrate conjugates	C02045		533-50-6/496-55-9	HMDB0006293
M121T263.neg	Nodiff	0.205533359424685	1.00368257517911	0.821155872764953	Nodiff	0.469502998259811	0.929111977339703	0.477373390112977	Erythritol	121.031	263.3	122.058	18.0871265862478	C4H10O4	[M-H]-			C00503	Membrane transport	149-32-6
M121T289.neg	Nodiff	1.33488133521924	1.30134239992737	0.0874917076102092	Nodiff	0.129273911443383	0.93409949614699	0.84740518474651	Phenylethylamine	121.066	288.6	121.089	20.9897378709099	C8H11N	[M]-	Benzene and substituted derivatives	Phenethylamines	C05332	Amino acid metabolism	64-04-0	HMDB0012275
M123T69.pos	Down	2.11108881676508	0.628307910028095	0.0119474789850105	Up	1.86259217895726	3.59820408560197	0.0128585275619327	Niacinamide	123.056	68.9	122.048	5.68846703935457	C6H6N2O	[M+H]+	Pyridines and derivatives	Pyridinecarboxylic acids and derivatives	C00153	Metabolism of cofactors and vitamins; Digestive system	98-92-0	HMDB0001406
M123T71.pos	Nodiff	0.916086426031828	1.25005569630387	0.337101111191944	Nodiff	0.892655449053858	0.733368679576776	0.286304102836966	4-Hydroxybenzaldehyde	123.045	70.7	122.037	6.69674240861982	C7H6O2	[M+H]+	Organooxygen compounds	Carbonyl compounds	C00633		123-08-0	HMDB0011718
M124T585.pos	Nodiff	0.88188967193955	0.613023034900749	0.402466260074038	Nodiff	0.315897702251994	1.28308331666757	0.70051994008865	3-Hydroxybenzyl alcohol glucoside	124.087	585	124.052	2.61033322670168	C7H8O2	[M]+	Organooxygen compounds	Carbohydrates and carbohydrate conjugates	C03351		143995-98-6 / 620-24-6	HMDB0038331
M124T687.neg	Nodiff	0.0766395865655115	0.916744167364016	0.935996381889705	Nodiff	0.708361531599734	1.8855980402867	0.28748633647597	1-Naphthylamine	123.902	686.7	143.073	5.45702967764769	C10H9N	[M-H2O-H]-			C14790	Xenobiotics biodegradation and metabolism	134-32-7
M126T41.pos	Nodiff	1.1698525189498	1.36682530335381	0.217784571570929	Nodiff	0.690036480542734	0.840131510079388	0.409728189477597	Ciliatine	125.987	40.6	125.024	0.233120588864078	C2H8NO3P	[M+H]+	Organic phosphonic acids and derivatives	Organic phosphonic acids	C03557	Membrane transport; Metabolism of other amino acids	2041-14-7	HMDB0011747
M127T400.pos	Nodiff	0.824952415117704	0.48116166975753	0.458508291376132	Nodiff	0.375899073144894	1.86035835693474	0.63376553196307	1,2,3-Trihydroxybenzene	127.039	400.5	126.032	1.38540351459861	C6H6O3	[M+H]+	Benzene and substituted derivatives	Phenols and derivatives	C01108		87-66-1	HMDB0013674
M129T220.pos	Nodiff	0.959128489284958	1.60408945268115	0.325905685543075	Nodiff	0.936569315632195	1.22120481228388	0.226229415399631	1,1-Dimethylbiguanide	129.103	219.6	129.101	2.08658958086769	C4H11N5	[M]+	Organonitrogen compounds	Guanidines	C07151	Signal transduction; Aging; Digestive system	1115-70-4 / 657-24-9	HMDB0001921
M129T33.neg	Nodiff	1.05036903025278	1.22930628544255	0.209121111935833	Nodiff	0.733225671074416	0.874439745712157	0.270051476933163	3-Methyl-2-oxovaleric acid	129.056	33.2	130.063	0.588892556607843	C6H10O3	[M-H]-	Keto acids and derivatives	Short-chain keto acids and derivatives	C03465		1460-34-0	HMDB0000491
M129T42_1.neg	Nodiff	0.610708927780504	1.13064350559824	0.5094539938309	Nodiff	0.216434549765947	1.1601942876826	0.771100061597049	Itaconic acid	129.02	42	130.027	2.91428363256625	C5H6O4	[M-H]-	Fatty Acyls	Fatty acids and conjugates	C00490		97-65-4/2964-00-3	HMDB0002092
M129T70.pos	Nodiff	1.30224808084001	0.723088503282139	0.146549218618085	Nodiff	0.446844315680467	1.08465062621845	0.599195042210418	Pyroglutamic acid	129.053	70	129.043	3.00415574985224	C5H7NO3	[M]+	Carboxylic acids and derivatives	Amino acids, peptides, and analogues	C01879	Metabolism of other amino acids	98-79-3	HMDB0000267
M129T97.neg	Nodiff	0.918810030596515	0.665372031895653	0.297892966785686	Up	1.3631863910021	2.68015036770493	0.0214672604047075	(S)-3-Methyl-2-oxopentanoic acid	129.056	96.8	130.063	2.91347015331616	C6H10O3	[M-H]-	Carboxylic acids and derivatives	Alpha-keto acids and derivatives	C00671	Amino acid metabolism
M130T356.pos	Nodiff	0.646171748692956	1.29395435747599	0.505679019628239	Nodiff	0.139452794260951	1.00548039611167	0.856928589703254	2-Ketohexanoic acid	130.066	355.6	130.063	5.28142196477393	C6H10O3	[M]+	Keto acids and derivatives	Medium-chain keto acids and derivatives	C00902		2492-75-3	HMDB0001864
M130T42.pos	Nodiff	1.18377015319726	0.809493718031398	0.186313297220005	Up	1.73568542275232	1.54771900070904	0.0132319736545203	N4-Acetylaminobutanal	130.087	41.7	129.079	4.39211022604455	C6H11NO2	[M+H]+	Organooxygen compounds	Carbonyl compounds	C05936	Amino acid metabolism		HMDB0004226
M130T57.pos	Nodiff	1.39925714525314	0.487503623764713	0.118810197534233	Nodiff	0.241685140513417	1.32027420610288	0.749877074890131	Pyrrolidonecarboxylic acid	130.051	56.9	129.043	5.38252034204237	C5H7NO3	[M+H]+	Carboxylic acids and derivatives	Amino acids, peptides, and analogues	C02237		4042-36-8	HMDB0000805
M130T70.pos	Nodiff	0.847138079761421	0.89189659035281	0.38204527759359	Nodiff	0.728561280823017	0.98509463536332	0.353237040133171	Pipecolic acid	130.051	70.4	129.079	25.6570610539288	C6H11NO2	[M+H]+	Carboxylic acids and derivatives	Amino acids, peptides, and analogues	C00408	Amino acid metabolism	535-75-1 / 3105-95-1	HMDB0000070
M131T43.neg	Nodiff	1.12188575080882	1.22186157816786	0.173656918844942	Nodiff	1.30928706747179	0.76592016540775	0.0352454316424917	Glutaric acid	131.035	43.1	132.042	2.8694535981653	C5H8O4	[M-H]-	Carboxylic acids and derivatives	Dicarboxylic acids and derivatives	C00489	Lipid metabolism; Amino acid metabolism	110-94-1	HMDB0000661
M131T75.neg	Down	1.90669663588797	0.565540755523572	0.00914749612076569	Up	1.59447372631287	3.2150159310982	0.00422110662938991	L-Isoleucine	131.071	74.9	131.095	8.36144597399597	C6H13NO2	[M]-	Carboxylic acids and derivatives	Amino acids, peptides, and analogues	C00407	Cancer: overview; Membrane transport; Digestive system; Translation; Amino acid metabolism	73-32-5	HMDB0000172
M132T163.pos	Nodiff	0.681089117811214	0.929459882609789	0.501409040621385	Nodiff	1.30000327661023	1.29363830073092	0.0793844887050509	cis-4-Hydroxy-L-proline	132.102	163.3	131.058	1.73132471435027	C5H9NO3	[M+H]+			C01015		618-27-9 / 51-35-4 / 30724-02-8
M132T179.pos	Nodiff	1.03169558419077	0.610014373747041	0.313764202444683	Nodiff	0.979121719987985	2.04615455734957	0.2148925670371	Aminocaproic acid	132.102	179.3	131.095	1.29604962402262	C6H13NO2	[M+H]+	Fatty Acyls	Fatty acids and conjugates	C02378		60-32-2 / 1319-82-0	HMDB0001901
M132T188.pos	Nodiff	0.431839122247519	1.07485022454092	0.774976290649415	Nodiff	1.25058669753211	2.18005293342948	0.0907972176050801	D-allo-Isoleucine	132.101	188.4	131.095	2.68702568115468	C6H13NO2	[M+H]+			C21092		1509-35-9
M132T290.pos	Down	2.19258195993171	0.609019247117504	0.00604046250872908	Up	1.97106106095716	3.0241532577668	0.00484762092329181	Leucine	132.102	289.5	131.095	1.33230685154234	C6H13NO2	[M+H]+	Carboxylic acids and derivatives	Amino acids, peptides, and analogues	C16439		328-39-2	HMDB0062203
M132T408.pos	Nodiff	0.0494382250640274	0.843392194940692	0.990559023159177	Nodiff	0.759228724398939	0.925177371915875	0.349881856883145	N-Carbamoylputrescine	132.102	408.5	131.106	2.41297605030843	C5H13N3O	[M+H]+	Carboximidic acids and derivatives	Carboximidic acids	C00436	Amino acid metabolism	6851-51-0	HMDB0033458
M132T52.pos	Nodiff	0.864587941122522	0.807546410971238	0.320914883494694	Down	1.85083952386345	0.193961240372483	0.00427366900829066	Creatine	132.077	52	131.07	2.47181423319102	C4H9N3O2	[M+H]+	Carboxylic acids and derivatives	Amino acids, peptides, and analogues	C00300	Amino acid metabolism	57-00-1	HMDB0000064
M132T75.pos	Nodiff	1.08224689722013	0.517681194847676	0.19854785887753	Nodiff	1.13207882361377	2.19809584482002	0.143679524397587	L-Leucine	132.066	74.8	131.095	8.78520479487203	C6H13NO2	[M+H]+	Carboxylic acids and derivatives	Amino acids, peptides, and analogues	C00123	Cancer: overview; Membrane transport; Signal transduction; Digestive system; Translation; Amino acid metabolism	61-90-5	HMDB0000687
M133T70.pos	Nodiff	1.11968644824324	1.23970333425024	0.315990482840568	Nodiff	0.669343616435359	1.29454037297985	0.399312376061619	5,6-Dihydro-5-fluorouracil	133.032	70	132.034	4.2347132617023	C4H5FN2O2	[M+H]+	Diazines	Pyrimidines and pyrimidine derivatives	C16630	Xenobiotics biodegradation and metabolism	696-06-0	HMDB0060402
M134T42.neg	Nodiff	0.965553786265653	0.806403472375514	0.228814958226458	Up	1.31704177124263	1.80799371346187	0.0257145109968077	L-Malic acid	134.018	42.5	134.022	10.9146208311277	C4H6O5	[M]-	Hydroxy acids and derivatives	Beta hydroxy acids and derivatives	C00149	Cancer: overview; Sensory system; Excretory system; Endocrine system; Carbohydrate metabolism; Cancer: specific types	97-67-6 / 6915-15-7	HMDB0000156
M134T75.neg	Nodiff	1.2931028973733	0.341942486204696	0.1358618230711	Nodiff	1.09355709252385	3.58909978683543	0.0741916592383679	Adenine	134.047	75.2	135.054	1.4920139951408	C5H5N5	[M-H]-	Imidazopyrimidines	Purines and purine derivatives	C00147	Nucleotide metabolism	73-24-5	HMDB0000034
M135T285.neg	Nodiff	0.0611161389485106	3.02944725369324	0.955006858812572	Down	1.26645917288354	0.217554353520295	0.0348919389875934	Phenylacetic acid	135.046	285.3	136.052	3.52473534880329	C8H8O2	[M-H]-	Benzene and substituted derivatives		C07086	Amino acid metabolism	103-82-2	HMDB0000209
M135T689.neg	Nodiff	1.66808282114225	1.2653677223208	0.0266931402616284	Nodiff	1.7448665534737	0.679037326821326	6.32417341111589e-05	Phenyl acetate	134.895	688.7	136.052	14.8612	C8H8O2	[M-H]-			C00548		122-79-2
M136T44.neg	Nodiff	1.17592377589064	1.1673790889719	0.185701263743522	Down	1.57197426706174	0.618708643536026	0.00371389178313424	Threonic acid	136.034	43.6	136.037	25.7289186429723	C4H8O5	[M]-	Organooxygen compounds	Carbohydrates and carbohydrate conjugates	C01620	Carbohydrate metabolism	3909-12-4/7306-96-9/70753-61-6	HMDB0000943
M136T646.pos	Nodiff	1.27214815550869	1.2808033862664	0.199708094921863	Nodiff	0.91250951435534	1.39043345810485	0.257540432268285	L-Homocysteine	136.049	646.3	135.035	5.46454479227345	C4H9NO2S	[M+H]+			C00155	Energy metabolism; Amino acid metabolism; Immune system	6027-13-0
M136T71.pos	Down	2.09530639831439	0.662339206271866	0.0127698601492175	Up	1.99560693425096	3.35589130314605	0.00467073292304565	Tetrahydropteridine	136.077	70.7	136.075	11.7580919556005	C6H8N4	[M]+	Pteridines and derivatives		C05650		10593-78-9	HMDB0001216
M137T70.pos	Nodiff	0.579587943552888	1.15441823500824	0.475515219054941	Nodiff	0.720557043610793	1.13161467251822	0.355161280273082	Hypoxanthine	137.047	69.6	136.038	5.20445250332592	C5H4N4O	[M+H]+	Imidazopyrimidines	Purines and purine derivatives	C00262	Nucleotide metabolism	68-94-0	HMDB0000157
M138T326.neg	Nodiff	1.08549444609372	1.63933453290048	0.193822593561466	Nodiff	0.592510261582156	1.52443835861822	0.367404786873473	4-Nitrophenol	138.02	325.5	139.027	2.89812860600216	C6H5NO3	[M-H]-	Phenols	Nitrophenols	C00870		100-02-7	HMDB0001232
M138T348.neg	Up	2.08212538054789	4.69142664183068	0.00459764571329784	Down	1.74304649616291	0.109685908167589	0.000635309793985222	6-Hydroxynicotinate	138.02	347.9	139.027	4.17330216877853	C6H5NO3	[M-H]-	Pyridines and derivatives	Pyridinecarboxylic acids and derivatives	C01020	Metabolism of cofactors and vitamins	5006-66-6	HMDB0002658
M140T36_2.pos	Nodiff	0.640721872318672	0.971182287069718	0.512914419871394	Nodiff	1.46519384522627	1.43756008709134	0.0571447617269234	Acetylphosphate	139.987	36	139.988	0.714350005809949	C2H5O5P	[M]+	Organic phosphoric acids and derivatives	Phosphate esters	C00227	Carbohydrate metabolism; Metabolism of other amino acids	590-54-5	HMDB0001494
M142T253.pos	Nodiff	0.905590016092661	1.23490726986838	0.36909179522735	Nodiff	1.02542672994304	0.712767546137265	0.212279056353166	O-Phosphoethanolamine	141.959	252.6	141.019	2.42680346663825	C2H8NO4P	[M+H]+	Organic phosphoric acids and derivatives	Phosphate esters	C00346	Lipid metabolism; Signal transduction	1071-23-4	HMDB0000224
M145T45.neg	Nodiff	0.892352557678847	0.804339730709978	0.280518698543803	Up	1.65193940871783	2.36821367423907	0.00311677136049347	L-Glutamine	145.062	45.1	146.069	2.59199829162915	C5H10N2O3	[M-H]-	Carboximidic acids and derivatives	Amines	C00064	Cancer: overview; Metabolism of cofactors and vitamins; Membrane transport; Nervous system; Excretory system; Digestive system; Carbohydrate metabolism; Nucleotide metabolism; Translation; Amino acid metabolism; Energy metabolism	56-85-9	HMDB0000641
M145T687.pos	Nodiff	1.20813566493274	0.337228703626367	0.244053958798302	Nodiff	0.41734092662154	0.700613278451381	0.623659571758375	Anabasine	144.983	686.5	162.116	4.73552981314535	C10H14N2	[M+H-H2O]+			C06180		13078-04-1 / 494-52-0	HMDB0004350
M145T69.pos	Nodiff	1.59651633749734	0.606567929488624	0.0532081657261868	Nodiff	0.0472786854210445	0.98634730217122	0.92819610923199	2-Keto-glutaramic acid	145.05	69.1	145.037	3.70961681571711	C5H7NO4	[M]+	Keto acids and derivatives	Short-chain keto acids and derivatives	C00940	Amino acid metabolism	18465-19-5	HMDB0001552
M145T76.pos	Nodiff	1.62600016029669	1.8557035552131	0.0864137590557784	Nodiff	0.867347222144969	0.453122055037053	0.268045563550104	4-Oxoglutaramate	145.05	76.5	145.037	4.58881099265033	C5H7NO4	[M]+			C05572	Amino acid metabolism
M146T43_2.neg	Nodiff	1.01797449935844	1.3567424132698	0.272234116095132	Nodiff	0.525440970158192	1.28200528088848	0.438721467894593	L-Glutamic acid	146.046	43.5	147.053	3.25923815987198	C5H9NO4	[M-H]-	Carboxylic acids and derivatives	Amino acids, peptides, and analogues	C00025	Neurodegenerative disease; Biosynthesis of other secondary metabolites; Translation; Substance dependence; Cellular community - eukaryotes; Energy metabolism; Metabolism of other amino acids; Excretory system; Carbohydrate metabolism; Cancer: overview; Membrane transport; Cell growth and death; Signal transduction; Nervous system; Digestive system; Environmental adaptation; Amino acid metabolism;…	56-86-0	HMDB0000148
M146T43.pos	Nodiff	0.584530998997587	1.41478298258847	0.547933934632272	Nodiff	0.653589772946929	0.785061161203161	0.41177278002206	Spermidine	146.166	42.6	145.158	3.97455969539536	C7H19N3	[M+H]+	Organonitrogen compounds	Amines	C00315	Amino acid metabolism; Membrane transport; Metabolism of other amino acids; Digestive system	124-20-9	HMDB0001257
M146T53.pos	Nodiff	0.385804128544085	0.870435460938519	0.727127742773654	Nodiff	1.03282845681082	2.37978505710248	0.204763982857801	Acetylcholine	146.118	53.1	146.118	0.684377442394716	C7H16NO2	[M]+	Organonitrogen compounds	Quaternary ammonium salts	C01996	Nervous system; Signal transduction; Sensory system; Endocrine system; Digestive system; Lipid metabolism; Neurodegenerative disease; Signaling molecules and interaction; Substance dependence; Cell motility	51-84-3	HMDB0000895
M147T42.pos	Down	2.03120533586218	0.627145146869313	0.0180192893736996	Up	2.0242157155706	3.62014278195042	0.00344882726737828	L-Lysine	147.114	42.4	146.106	2.16669295014901	C6H14N2O2	[M+H]+	Carboxylic acids and derivatives	Amino acids, peptides, and analogues	C00047	Metabolism of cofactors and vitamins; Membrane transport; Digestive system; Translation; Amino acid metabolism	56-87-1	HMDB0000182
M147T686.pos	Nodiff	1.5385653928853	0.576862901293621	0.0874700155315876	Up	1.79215188806185	2.96161512173332	0.00597391933980953	4-Hydroxycinnamic acid	146.981	686.2	164.047	7.40920888458822	C9H8O3	[M+H-H2O]+	Cinnamic acids and derivatives	Hydroxycinnamic acids and derivatives	C00811	Amino acid metabolism; Metabolism of cofactors and vitamins	7400-08-0 / 7400-08-0 501-98-4 / 501-98-4	HMDB0002035
M148T70.pos	Nodiff	0.435764489673083	1.01780885624051	0.670639511892226	Nodiff	0.851352955945227	0.669758094383309	0.287206288508085	trans-Cinnamate	148.043	70	148.052	3.11497241009695	C9H8O2	[M]+			C00423	Amino acid metabolism; Metabolism of cofactors and vitamins	140-10-3
M149T105.pos	Nodiff	0.587658137940763	0.964743531762454	0.573544287922727	Nodiff	0.728831245485093	0.902510419293625	0.378830466668023	Nornicotine	149.061	105	148.1	6.35031253034029	C9H12N2	[M+H]+	Pyridines and derivatives	Pyrrolidinylpyridines	C06524		494-97-3	HMDB0001126
M149T198.pos	Nodiff	0.3567612603293	0.935288007277567	0.62628877656436	Nodiff	0.529455883719512	0.915425777450288	0.510967899718261	L-2-Hydroxyglutaric acid	148.978	197.9	148.037	3.53843855145495	C5H8O5	[M+H]+	Fatty Acyls	Fatty acids and conjugates	C03196	Amino acid metabolism	13095-48-2	HMDB0000694
M149T543.neg	Nodiff	0.14911360807214	1.01555462295558	0.88060763526747	Nodiff	0.95747905868033	1.23031745030316	0.132796861124162	L-Arabinose	149.01	543	150.053	11.8696730757372	C5H10O5	[M-H]-	Organooxygen compounds	Carbohydrates and carbohydrate conjugates	C00259	Carbohydrate metabolism; Membrane transport	5328-37-0 / 147-81-9 / 87-72-9	HMDB0000646
M150T548.neg	Nodiff	0.241553206289358	0.754077915661875	0.797248419922603	Nodiff	0.138181354988078	1.11902846757562	0.818621615492134	D-Ribose	149.994	548.2	150.053	4.72123509759453	C5H10O5	[M]-	Organooxygen compounds	Carbohydrates and carbohydrate conjugates	C00121	Carbohydrate metabolism; Membrane transport	613-83-2 / 50-69-1	HMDB0000283
M150T627.pos	Nodiff	1.0402442707671	0.629525097002357	0.315886082787521	Nodiff	0.817926319321992	1.58769133534355	0.308584005989777	3-Methyladenine	150.128	626.6	149.07	14.7648776212392	C6H7N5	[M+H]+	Imidazopyrimidines	Purines and purine derivatives	C00913		5142-23-4	HMDB0011600
M151T70.pos	Nodiff	1.34759963921328	0.745636369811625	0.201696323064318	Up	1.44061768362468	1.75622680183084	0.0463608237081833	L-Ribulose	151.062	69.8	150.053	13.3984632808453	C5H10O5	[M+H]+	Organooxygen compounds	Carbohydrates and carbohydrate conjugates	C00310	Carbohydrate metabolism	2042-27-5 / 551-84-8	HMDB0003371
M152T375.neg	Nodiff	0.39169882831216	1.15981659011271	0.607867602964728	Nodiff	0.968892071008228	0.81095895104049	0.123974884167902	Aminosalicylic Acid	152.036	374.6	153.043	2.47310335657091	C7H7NO3	[M-H]-	Benzene and substituted derivatives	Benzoic acids and derivatives	C02518		65-49-6	HMDB0014378
M153T222.neg	Nodiff	1.1335203680819	0.968528132295084	0.176177864325185	Nodiff	0.363761132326489	1.01042478476891	0.577751026153851	2-Pyrocatechuic acid	153.02	222.2	154.027	3.7642162881772	C7H6O4	[M-H]-	Benzene and substituted derivatives	Benzoic acids and derivatives	C00196		303-38-8	HMDB0000397
M153T70.pos	Nodiff	1.09146926507721	1.75635732822646	0.218307182840944	Nodiff	0.366979440218752	0.979501543364234	0.643471649966814	Xanthine	153.042	70.2	152.033	3.55621678667782	C5H4N4O2	[M+H]+	Imidazopyrimidines	Purines and purine derivatives	C00385	Biosynthesis of other secondary metabolites; Nucleotide metabolism	69-89-6	HMDB0000292
M153T75.pos	Nodiff	0.954287546295813	1.84425696712751	0.350726641496673	Nodiff	0.541319498621106	0.858295252075042	0.523218066988173	FAPy-adenine	153.067	74.5	153.065	1.81406877777292	C5H7N5O	[M]+	Diazines	Pyrimidines and pyrimidine derivatives	C06502		5122-36-1	HMDB0004816
M154T74.pos	Nodiff	0.418721136963528	0.939606804165466	0.691885255483758	Up	1.59227696049011	1.86382416491863	0.0288648347701627	3-Amino-4-hydroxybenzoate	154.05	74.1	153.043	3.4014841894888	C7H7NO3	[M+H]+			C12115		1571-72-8
M155T92.pos	Nodiff	1.19273090704406	1.37193242505362	0.259048450788146	Nodiff	1.04534836850899	0.662160568788554	0.210762303729391	2,3-Butanediol	154.991	91.9	154.012	4.7342332816326	C4H10O2S2	[M+H]+	Organooxygen compounds	Alcohols and polyols	C00265		513-85-9 / 3483-12-3	HMDB0003156
M157T135.pos	Nodiff	0.793190308829617	0.862544381248188	0.395952168303987	Nodiff	0.239705816126814	0.949774249348891	0.770905446816373	Suberic acid	157.084	135	174.089	4.15670611664541	C8H14O4	[M+H-H2O]+	Fatty Acyls	Fatty acids and conjugates	C08278		505-48-6	HMDB0000893
M157T154.pos	Nodiff	1.60473744429448	2.30256186034381	0.0796021821986885	Nodiff	0.0547274544691686	1.31786573913511	0.952500910804976	Uracil 5-carboxylate	156.967	154	156.017	0.59632570141529	C5H4N2O4	[M+H]+			C03030		23945-44-0
M158T424.pos	Nodiff	0.268771706524153	1.09037165463433	0.727174207489633	Nodiff	0.757675138202127	0.739374294355095	0.354581206121179	Pelargonic acid	158.155	423.6	158.131	8.3472553996725	C9H18O2	[M]+	Fatty Acyls	Fatty acids and conjugates	C01601		112-05-0	HMDB0000847
M159T236.neg	Down	2.35615218435566	0.313383057678126	0.000195486593422304	Up	1.71025565122817	3.3578827304696	0.000218425177573318	3-Hydroxyvalproic acid	159.103	236.4	160.11	2.51409306300932	C8H16O3	[M-H]-	Fatty Acyls	Fatty acids and conjugates	C16651	Xenobiotics biodegradation and metabolism	58888-84-9	HMDB0013899
M159T257.pos	Nodiff	0.898332244240446	0.520152115619327	0.394835380571661	Nodiff	0.0822450799861962	1.26219892380156	0.894358339256283	Allantoin	158.962	257.4	158.044	9.38921476877999	C4H6N4O3	[M+H]+	Azoles	Imidazoles	C01551		97-59-6	HMDB0000462
M159T326.pos	Nodiff	0.145083180339199	1.07356502448476	0.967892629808746	Nodiff	0.55134794438503	0.744861690547666	0.475922065127062	4,5-Dihydroorotic acid	158.962	325.7	158.033	5.58524199781641	C5H6N2O4	[M+H]+	Carboxylic acids and derivatives	Amino acids, peptides, and analogues	C00337	Nucleotide metabolism	155-54-4 / 5988-19-2	HMDB0000528
M159T43_2.neg	Up	1.5690814249332	2.22200470159679	0.0432826365838162	Down	1.80021054821613	0.259386485829473	1.16255297749962e-06	Gluconolactone	159.03	42.8	178.048	6.85403545470865	C6H10O6	[M-H2O-H]-	Organooxygen compounds	Carbohydrates and carbohydrate conjugates	C00198	Carbohydrate metabolism	90-80-2	HMDB0000150
M159T69.pos	Nodiff	0.781823507097505	1.3025415583959	0.438376776375786	Nodiff	0.0859634298833752	0.792604190554708	0.920342085714135	Ascorbate	159.029	69.2	176.032	24.1088861431246	C6H8O6	[M+H-H2O]+			C00072	Carbohydrate metabolism; Metabolism of other amino acids; Signal transduction; Digestive system	50-81-7
M160T43_2.neg	Nodiff	1.34968078171128	1.72945121834097	0.143362810662554	Nodiff	0.800773571734987	0.781077589829361	0.238828094598584	N-methyl-L-glutamic Acid	160.062	43.5	161.069	2.97384763416894	C6H11NO4	[M-H]-	Carboxylic acids and derivatives	Amino acids, peptides, and analogues	C01046		35989-16-3/NA	HMDB0062660
M160T85.pos	Nodiff	0.915083554832946	1.36273672432764	0.319842485987187	Nodiff	0.429418043258651	1.24361595167394	0.592337152058968	Pimelic acid	159.97	85.4	160.074	7.30467013576893	C7H12O4	[M]+	Fatty Acyls	Fatty acids and conjugates	C02656	Metabolism of cofactors and vitamins	111-16-0	HMDB0000857
M161T43.neg	Nodiff	0.403846015763268	1.32917191128235	0.624396438851004	Nodiff	0.727700094031977	2.2431240575695	0.249622635338676	3-Hydroxymethylglutaric acid	161.045	42.6	162.053	3.10472228269489	C6H10O5	[M-H]-	Fatty Acyls	Fatty acids and conjugates	C03761		503-49-1	HMDB0000355
M162T71.pos	Nodiff	0.125777833759015	0.983876149381865	0.816328531158334	Nodiff	0.192756775799158	0.981895280458406	0.81111029719621	O-Acetyl-L-homoserine	162.077	70.6	161.069	5.1160405917654	C6H11NO4	[M+H]+			C01077	Amino acid metabolism	7540-67-2
M163T408.pos	Nodiff	0.487762641552251	0.92254441196988	0.643313486800438	Nodiff	0.728548496828406	1.75701691129788	0.383760915551733	2-Deoxystreptamine	163.113	408.4	162.1	3.42208413070384	C6H14N2O3	[M+H]+			C02627	Biosynthesis of other secondary metabolites	2037-48-1
M164T90.neg	Down	1.77686411159057	0.538881834973872	0.0213426793268037	Up	1.58759855977637	3.75465818104779	0.00213201972996071	L-Phenylalanine	164.072	90.2	165.079	2.90116180571937	C9H11NO2	[M-H]-	Carboxylic acids and derivatives	Amino acids, peptides, and analogues	C00079	Cancer: overview; Membrane transport; Digestive system; Translation; Amino acid metabolism	63-91-2	HMDB0000159
M165T198.neg	Nodiff	1.43187286539307	1.15452139991043	0.101031857368428	Nodiff	0.906384921209917	1.18433132760419	0.14220754266172	Vanylglycol	165.056	197.6	184.074	5.3921060778625	C9H12O4	[M-H2O-H]-	Phenols	Methoxyphenols	C05594	Amino acid metabolism	534-82-7/67423-45-4	HMDB0001490
M165T543.neg	Nodiff	1.06928514363181	1.33084105536674	0.280658823604143	Nodiff	0.786067383656182	0.732472687540743	0.258971073961283	Phthalic acid	165.042	543	166.027	8.38072650228133	C8H6O4	[M-H]-	Benzene and substituted derivatives	Benzoic acids and derivatives	C01606	Membrane transport	88-99-3 / 3198-29-6	HMDB0002107
M165T681.neg	Nodiff	0.908243340286309	0.95370381300986	0.266622085558094	Nodiff	1.28131519152367	0.911244802303277	0.0269280416890098	Desaminotyrosine	165.041	681.2	166.063	8.43094567800205	C9H10O3	[M-H]-	Phenylpropanoic acids		C01744		501-97-3	HMDB0002199
M165T71.pos	Down	1.9430959540433	0.658899778101383	0.0253390314579685	Up	1.97342034539807	3.4096241414094	0.00569747308961168	2-Hydroxycinnamic acid	165.055	70.7	164.047	1.17355246771911	C9H8O3	[M+H]+	Cinnamic acids and derivatives	Hydroxycinnamic acids and derivatives	C01772	Amino acid metabolism	583-17-5 / 614-60-8	HMDB0002641
M166T103.neg	Nodiff	1.20658026371182	1.23966755442056	0.161811902662602	Up	1.24482242059906	1.56505809736152	0.033320084323751	Phenyllactate	166.059	102.5	166.063	21.6439885064881	C9H10O3	[M]-	Phenylpropanoic acids		C05607	Amino acid metabolism	7326-19-4	HMDB0000563
M166T198.neg	Nodiff	1.16389559208312	0.929366767481112	0.144306785881291	Nodiff	1.10035083849338	0.927116260030147	0.0721640041153124	6-Methylmercaptopurine	166.06	197.9	166.031	9.05083241741854	C6H6N4S	[M]-	Imidazopyrimidines	Purines and purine derivatives	C16614	Xenobiotics biodegradation and metabolism	50-66-8	HMDB0060412
M166T89.neg	Nodiff	0.0762906853113005	1.01576634070023	0.931776093214195	Nodiff	1.12825087616377	0.720175866060314	0.0633504736415207	3-Methylxanthine	166.052	88.9	166.049	14.4533473048687	C6H6N4O2	[M]-	Imidazopyrimidines	Purines and purine derivatives	C16357	Biosynthesis of other secondary metabolites	1076-22-8	HMDB0001886
M167T50.neg	Nodiff	0.47508774513626	1.16369906237776	0.602731293617312	Nodiff	0.629491765301921	1.36774188661815	0.340061310069135	Uric acid	167.022	49.8	168.028	2.99362477677497	C5H4N4O3	[M-H]-	Imidazopyrimidines	Purines and purine derivatives	C00366	Digestive system; Nucleotide metabolism	69-93-2	HMDB0000289
M170T107.neg	Nodiff	1.20740860440728	0.594949472953343	0.165039349609945	Nodiff	1.26334480686088	2.16277274982326	0.0546093294052313	N-Acetylglutamic acid	170.047	107.4	189.064	6.99808581775126	C7H11NO5	[M-H2O-H]-	Carboxylic acids and derivatives	Amino acids, peptides, and analogues	C00624	Amino acid metabolism	1188-37-0	HMDB0001138
M170T272_2.pos	Nodiff	0.790284842408747	1.1952292555754	0.354903547647151	Nodiff	1.16170487913504	1.48027983142156	0.130027255761295	8-Amino-7-oxononanoate	170.118	271.8	187.121	29.5911553364884	C9H17NO3	[M+H-H2O]+			C01092	Metabolism of cofactors and vitamins	4707-58-8
M170T36.pos	Up	2.06482139987717	1.96568936236199	0.0153630908246533	Nodiff	1.33170458197388	0.716851802205351	0.0887640857638639	Norepinephrine	169.978	36	169.074	0.040647567307109	C8H11NO3	[M+H]+	Phenols	Benzenediols	C00547	Circulatory system; Nervous system; Signal transduction; Sensory system; Endocrine system; Digestive system; Environmental adaptation; Signaling molecules and interaction; Amino acid metabolism; Cellular community - eukaryotes	51-41-2	HMDB0000216
M171T245.pos	Nodiff	0.373731766924154	1.03159528781125	0.715794483813662	Nodiff	0.349600382952573	0.940655784790301	0.677418855457788	Azelaic acid	171.1	245.4	188.105	14.2256073790448	C9H16O4	[M+H-H2O]+	Fatty Acyls	Fatty acids and conjugates	C08261		123-99-9	HMDB0000784
M171T43.neg	Nodiff	1.39625407341141	1.24924904144689	0.100072111106684	Nodiff	0.253969306000233	0.849691391641627	0.732365576115077	DL-Glycerol 1-phosphate	171.007	42.9	172.014	2.78351341373902	C3H9O6P	[M-H]-	Glycerophospholipids	Glycerophosphates	C03189		1957-03-04	HMDB0000126
M172T230.pos	Nodiff	0.941576987432925	1.29796936492463	0.351243130382956	Down	1.67334139686489	0.556529293999457	0.0142083056536964	3-Dehydroshikimate	171.994	230.2	172.037	5.26976680032482	C7H8O5	[M]+			C02637	Amino acid metabolism	2922-42-1
M172T564.pos	Nodiff	0.0600707776508979	0.996977337314335	0.897978218053797	Nodiff	0.427043418999922	0.969937323799512	0.622024968274487	Gabapentin	172.134	564.4	171.126	1.40271577955223	C9H17NO2	[M+H]+			C07018		60142-96-3
M172T95.neg	Down	1.73353157739001	0.349282759044673	0.0217185012265566	Up	1.72621797276044	37.0494404519789	0.000609155126312968	N-Acetylleucine	172.098	95.4	173.105	2.76585953147692	C8H15NO3	[M-H]-	Carboxylic acids and derivatives	Amino acids, peptides, and analogues	C02710		1188-21-2	HMDB0011756
M173T138.pos	Nodiff	1.35507907478007	0.439649591313124	0.127737138428607	Nodiff	0.70237550223937	1.60367333793369	0.358138669630606	4-Quinolinecarboxylic acid	172.957	138.2	173.048	2.60208356878301	C10H7NO2	[M]+			C06414		486-74-8
M173T147.neg	Down	1.95253560203137	0.494581251256736	0.00644575453888188	Up	1.64376707678462	2.46121547332262	0.00111941079977665	Shikimic acid	173.046	147.2	174.053	0	C7H10O5	[M-H]-	Organooxygen compounds	Alcohols and polyols	C00493	Amino acid metabolism	138-59-0	HMDB0003070
M173T33_2.neg	Nodiff	0.520171976336783	0.906900088414714	0.555675855234093	Nodiff	0.923771134185493	1.61036893756583	0.143552282886015	Quinate	173.048	32.8	192.063	14.3891128159781	C7H12O6	[M-H2O-H]-	Organooxygen compounds	Alcohols and polyols	C00296	Amino acid metabolism	77-95-2	HMDB0003072
M173T40.neg	Nodiff	0.805089998093618	0.439238424932951	0.404984368005262	Nodiff	0.91195284389512	3.06569579735432	0.177263772519852	cis-Aconitic acid	173.01	39.9	174.016	2.31201043186782	C6H6O6	[M-H]-	Carboxylic acids and derivatives	Tricarboxylic acids and derivatives	C00417	Carbohydrate metabolism	585-84-2/499-12-7	HMDB0000072
M173T77.neg	Nodiff	1.45953014800862	0.968889954969612	0.0608940640523834	Nodiff	0.594328897492183	1.02928404168801	0.378325772069821	Gramine	173.105	77.2	174.116	22.0817239980566	C11H14N2	[M-H]-	Indoles and derivatives	Indoles	C08304		87-52-5	HMDB0035762
M174T43.neg	Nodiff	0.774233938091696	0.821115451621145	0.358684177130249	Up	1.48840131011166	2.03444118163881	0.0156241161204761	N-Acetyl-L-aspartic acid	174.042	42.7	175.048	3.88413108383339	C6H9NO5	[M-H]-	Carboxylic acids and derivatives	Amino acids, peptides, and analogues	C01042	Amino acid metabolism	997-55-7	HMDB0000812
M175T44_2.pos	Nodiff	0.517738186690996	0.923475537064118	0.59510149653338	Up	1.76243658390318	2.53106870960799	0.00765761795698408	L-Arginine	175.12	44.2	174.112	3.23890188322619	C6H14N4O2	[M+H]+	Carboxylic acids and derivatives	Amino acids, peptides, and analogues	C00062	Cancer: overview; Membrane transport; Signal transduction; Digestive system; Neurodegenerative disease; Translation; Amino acid metabolism; Infectious disease: parasitic	74-79-3	HMDB0000517
M176T326.pos	Nodiff	0.141832701199242	1.14652208585696	0.925930852357012	Nodiff	0.264025972020369	0.798496139948871	0.725254153655996	N-Formyl-L-glutamic acid	176.071	326.1	175.048	1.89364486573019	C6H9NO5	[M+H]+	Carboxylic acids and derivatives	Amino acids, peptides, and analogues	C01045	Amino acid metabolism	1681-96-5	HMDB0003470
M177T195.pos	Nodiff	0.795144460145118	1.50547929366531	0.44442877014813	Nodiff	1.30585503257085	1.58545431821754	0.0798335796463535	N-Formyl-L-methionine	176.974	195.1	177.046	11.3004053137166	C6H11NO3S	[M]+	Carboxylic acids and derivatives	Amino acids, peptides, and analogues	C03145	Amino acid metabolism	4289-98-9	HMDB0001015
M177T98.pos	Nodiff	0.869869573837029	0.58818362541656	0.380923536611274	Nodiff	0.706428068270853	0.68234681549378	0.396386013075243	Methyl beta-D-galactoside	176.973	97.8	194.079	6.07425338006615	C7H14O6	[M+H-H2O]+			C03619	Membrane transport	1824-94-8
M178T93.neg	Nodiff	0.75602203961373	0.856881878382969	0.401289771775988	Nodiff	0.0507988707679357	0.962543696941014	0.927791746603438	Hippuric acid	178.051	92.6	179.058	1.68490766430775	C9H9NO3	[M-H]-	Benzene and substituted derivatives	Benzoic acids and derivatives	C01586	Amino acid metabolism	495-69-2	HMDB0000714
M179T453.pos	Nodiff	0.919822455129832	0.659302988945977	0.358282711023081	Nodiff	0.524618095429604	0.814689842398247	0.494688773203382	Methyleugenol	179.107	452.9	178.099	2.14005991363678	C11H14O2	[M+H]+	Benzene and substituted derivatives	Methoxybenzenes	C10454		93-15-2	HMDB0031864
M180T70.neg	Nodiff	0.33230955805548	1.0808172615356	0.732082567509561	Nodiff	0.610340939638688	1.43099938398404	0.348269953179111	D-Fructose	180.067	69.8	180.063	19.9929580359241	C6H12O6	[M]-	Organooxygen compounds	Alcohols and polyols	C00095	Endocrine and metabolic disease; Membrane transport; Sensory system; Digestive system; Carbohydrate metabolism	53188-23-1/87-81-0	HMDB0000660
M181T58.neg	Nodiff	1.44875867067855	3.18594486774223	0.0653975383899316	Down	1.76415635719016	0.100113757862206	5.79854701485852e-05	Acetylcholine chloride	180.974	57.6	181.087	8.62509199410802	C7H16NO2. Cl	[M]-			C08201		60-31-1
M181T72.neg	Nodiff	0.159492731813537	1.01733716583476	0.873317664878219	Nodiff	0.772498503903039	0.849943453845169	0.256926168800421	Galactitol	180.973	71.7	182.079	1.35120368845353	C6H14O6	[M-H]-	Organooxygen compounds	Carbohydrates and carbohydrate conjugates	C01697	Carbohydrate metabolism	608-66-2	HMDB0000107
M182T310.pos	Nodiff	0.112394013434671	1.00577730089411	0.968511637783541	Down	1.95132325944729	0.555090225720122	0.00122587792811105	1-Methyluric acid	182.046	309.6	182.044	10.4369282690674	C6H6N4O3	[M]+	Imidazopyrimidines	Purines and purine derivatives	C16359	Biosynthesis of other secondary metabolites	708-79-2	HMDB0003099
M182T71.pos	Nodiff	0.0406305801158329	0.986756445000621	0.98595018514418	Nodiff	0.396963245446438	0.970535261222485	0.632758705316675	L-Tyrosine	182.082	70.7	181.074	3.44082876848456	C9H11NO3	[M+H]+	Carboxylic acids and derivatives	Amino acids, peptides, and analogues	C00082	Cancer: overview; Metabolism of cofactors and vitamins; Nervous system; Digestive system; Endocrine system; Neurodegenerative disease; Translation; Amino acid metabolism; Substance dependence	60-18-4	HMDB0000158
M182T91.neg	Nodiff	1.15818092253329	0.74225976503694	0.169067391668907	Up	1.56735452633459	2.63748868133708	0.00178614358806987	4-Pyridoxic acid	182.046	90.5	183.053	2.61471800591458	C8H9NO4	[M-H]-	Pyridines and derivatives	Pyridinecarboxylic acids and derivatives	C00847	Metabolism of cofactors and vitamins	82-82-6	HMDB0000017
M183T259.neg	Nodiff	0.594144122676189	1.17462638407819	0.481112054141516	Nodiff	0.88635354458607	0.667577046001321	0.155286241904681	2,4-Dinitrophenol	183.005	259.1	184.012	1.50815551479625	C6H4N2O5	[M-H]-	Textile Chemicals/Auxiliary/Dyes; Pesticides/Herbicides; Industrial Chemicals; Endogenous Metabolites		C02496		51-28-5
M183T302.pos	Nodiff	0.172153250366102	0.92593137730524	0.831851793461559	Nodiff	1.35453220664183	0.549243268241566	0.0938543788787637	Sorbitol	182.986	302	182.079	2.03439180114875	C6H14O6	[M+H]+	Organooxygen compounds	Carbohydrates and carbohydrate conjugates	C00794	Carbohydrate metabolism; Membrane transport	50-70-4	HMDB0000247
M183T392.pos	Nodiff	0.413994673327456	0.560272499839924	0.672789422501701	Nodiff	0.0200615678136962	1.33047592932168	0.966062647115694	Se-Methylselenocysteine	182.986	392.1	182.98	0.126254856263942	C4H9NO2Se	[M]+	Carboxylic acids and derivatives	Amino acids, peptides, and analogues	C05689	Metabolism of other amino acids	26046-90-2 / 2574-71-2 / NA	HMDB0004113
M184T122.pos	Nodiff	0.222629157078515	0.998737407997364	0.886076569384663	Nodiff	0.20804732575989	1.05704421244406	0.779980555886228	3,4-Dihydroxymandelic acid	184.171	122.3	184.037	4.58217697077678	C8H8O5	[M]+			C05580	Amino acid metabolism	14883-87-5	HMDB0001866
M184T520.pos	Nodiff	0.222115673812532	1.00920947846903	0.789840365419263	Nodiff	0.34192180625283	0.974716625248576	0.688970529279795	Phosphorylcholine	184.074	520	184.074	1.08651896153895	C5H15NO4P	[M]+	Organonitrogen compounds	Quaternary ammonium salts	C00588	Lipid metabolism; Cancer: overview	3616-04-4/107-73-3	HMDB0001565
M185T301.pos	Up	1.84817231307763	2.64167401118132	0.0348446914787708	Nodiff	0.459472178606277	0.991869375838295	0.583927738925407	Phosphohydroxypyruvic acid	184.987	300.6	183.977	10.9414527620173	C3H5O7P	[M+H]+	Carboxylic acids and derivatives	Alpha-keto acids and derivatives	C03232	Amino acid metabolism	3913-50-6	HMDB0001024
M185T342.pos	Nodiff	0.215901682312755	0.979937478949459	0.746715242914153	Nodiff	0.506420349256903	0.944552040525126	0.520450758213739	Sebacic acid	185.118	342.4	202.12	15.4387691155663	C10H18O4	[M+H-H2O]+	Fatty Acyls	Fatty acids and conjugates	C08277		111-20-6	HMDB0000792
M185T661.pos	Nodiff	0.861193503034609	0.785111564738903	0.349736846827861	Nodiff	0.567136865532993	1.19312595700854	0.459938640877994	Phosphoserine	185.165	660.9	185.009	1.29062982308573	C3H8NO6P	[M]+	Carboxylic acids and derivatives	Amino acids, peptides, and analogues	C01005	Amino acid metabolism; Translation	407-41-0	HMDB0000272
M187T282.pos	Nodiff	1.44877421404239	1.78387705767411	0.132917754019563	Nodiff	1.06459655015828	0.537221294474395	0.171882934136822	Undecanoic acid	186.957	282.1	186.162	4.50910423929123	C11H22O2	[M+H]+	Fatty Acyls	Fatty acids and conjugates	C17715		112-37-8	HMDB0000947
M187T311.neg	Nodiff	0.0313607245156921	0.8461181827114	0.936470119179976	Nodiff	0.351368766682188	1.40311520058484	0.586996917278533	10-Hydroxydecanoic acid	187.135	311	188.141	3.07800004806835	C10H20O3	[M-H]-			C02774		1679-53-4
M187T70.pos	Nodiff	0.481095875290248	0.0701201147603677	0.518477810247159	Nodiff	0.896804156720798	39.4838954503507	0.281950449851643	5-Guanidino-3-methyl-2-oxopentanoate	187.109	69.7	187.096	3.58041324106038	C7H13N3O3	[M]+			C20234
M188T188.pos	Nodiff	1.26288859431854	0.63779540071214	0.193896683673598	Up	1.93360509583505	5.44682680319051	0.0013039268412678	N-Alpha-acetyllysine	188.072	187.6	188.116	5.13822597440111	C8H16N2O3	[M]+	Carboxylic acids and derivatives	Amino acids, peptides, and analogues	C12989		1946-82-3	HMDB0000446
M188T221.pos	Nodiff	0.767583241762901	0.725039866742621	0.352060264741542	Nodiff	0.283560664951208	0.765474391555174	0.708005436863061	3-Indoleacrylate	188.071	220.8	187.063	0.777769255672632	C11H9NO2	[M+H]+			C21283
M189T288.pos	Nodiff	0.154849938673808	0.341283484750341	0.760561001912742	Nodiff	0.454852474982267	3.48581497050438	0.589647331084678	Dimethyltryptamine	189.14	287.8	188.131	5.28710011020841	C12H16N2	[M+H]+	Indoles and derivatives	Tryptamines and derivatives	C08302		61-50-7	HMDB0005973
M189T84.pos	Nodiff	1.03120105012348	0.784273491375235	0.279537908911934	Up	1.96448998653455	4.50955341908234	0.00442828126360534	Glycylleucine	189.124	84.3	188.116	4.88567571696342	C8H16N2O3	[M+H]+	Carboxylic acids and derivatives	Amino acids, peptides, and analogues	C02155		869-19-2	HMDB0000759
M190T356.pos	Nodiff	0.906393472314052	0.814673125612155	0.344977155090315	Nodiff	0.517318028175203	0.81290597253384	0.502945523218745	L-2-Amino-6-oxoheptanedioate	190.087	355.9	189.064	2.55281220787984	C7H11NO5	[M+H]+			C03871		75650-93-0
M191T43_1.neg	Nodiff	0.708378013348005	0.664007644973381	0.42760731845367	Nodiff	0.0471214503983194	0.902928423603307	0.950415468348581	Citric acid	191.02	42.7	192.027	3.01538632279002	C6H8O7	[M-H]-	Carboxylic acids and derivatives	Tricarboxylic acids and derivatives	C00158	Cancer: overview; Sensory system; Endocrine system; Carbohydrate metabolism; Amino acid metabolism	77-92-9 / 126-44-3	HMDB0000094
M192T125.neg	Nodiff	0.870192924548573	2.45610069744827	0.321037902126704	Nodiff	1.25197397823189	0.371342386616603	0.0531156444716023	Phenylacetylglycine	192.067	125.3	193.074	1.95765019507271	C10H11NO3	[M-H]-	Carboxylic acids and derivatives	Amino acids, peptides, and analogues	C05598	Amino acid metabolism	500-98-1	HMDB0000821
M194T271.pos	Nodiff	1.40707733419637	0.598870166949532	0.11652124988361	Nodiff	0.0584050350912307	1.07357448270299	0.948134048588974	Sequoyitol	194.082	271.5	194.079	4.21504900754884	C7H14O6	[M]+	Alcohols and polyols	Cyclic alcohols and derivatives	C03365		523-92-2	HMDB0031449
M194T287.pos	Nodiff	0.580284541077419	1.08754856863834	0.553255407479153	Nodiff	1.30710296559766	0.598730788039842	0.099608424828245	3,4-Methylenedioxyamphetamine	194.116	286.8	193.11	2.98783402008704	C11H15NO2	[M+H]+	Benzodioxoles		C07577		4764-17-4 / 42542-10-9	HMDB0041931
M194T84.pos	Nodiff	0.860209714838424	1.16269532999092	0.411006457549658	Nodiff	0.448913123961184	1.61104791819694	0.574598574006238	Orciprenaline	194.119	83.6	211.121	28.5083008402739	C11H17NO3	[M+H-H2O]+	Phenols	Benzenediols	C07144		586-06-1	HMDB0014954
M195T480.pos	Nodiff	1.10303145238479	0.724447464693253	0.179223320971094	Nodiff	0.662076074189075	1.22341141072179	0.406532991113126	3-Methyl-L-tyrosine	195.089	480.1	195.089	3.58810961979784	C10H13NO3	[M]+			C20800
M195T602.pos	Nodiff	0.0577447429953238	0.876879382400583	0.99007877969152	Nodiff	0.347457316810566	0.844988642597474	0.653167565455185	Caffeine	195.089	601.9	194.08	3.50168684634226	C8H10N4O2	[M+H]+	Imidazopyrimidines	Purines and purine derivatives	C07481	Biosynthesis of other secondary metabolites	1958-08-02	HMDB0001847
M196T44_1.neg	Nodiff	0.261157500077198	1.05152009488154	0.764226662528746	Nodiff	0.467276335150834	0.806266973508302	0.470581238612638	Gluconic acid	195.976	44	196.058	22.0419394571487	C6H12O7	[M]-	Organooxygen compounds	Carbohydrates and carbohydrate conjugates	C00257	Carbohydrate metabolism	526-95-4	HMDB0000625
M198T419.neg	Nodiff	0.963601674374958	0.83184538348057	0.241696969071137	Up	1.73742083082166	3.36725280966787	0.000232925578249534	Procollagen 5-hydroxy-L-lysine	197.808	419.3	-	0.786450743667694	C7H13N3O3R2	[M-H]-			C01211	Amino acid metabolism	13204-98-3
M200T36_1.pos	Nodiff	1.47190474757519	0.939252343324984	0.124152813723536	Nodiff	0.185204904129939	0.989623701509134	0.793259690750888	Dodecanoic acid	199.991	36	200.178	15.0838232696904	C12H24O2	[M]+	Fatty Acyls	Fatty acids and conjugates	C02679	Lipid metabolism	143-07-7	HMDB0000638
M203T64.pos	Nodiff	0.0152862709928575	1.00787147686786	0.987793739543059	Nodiff	0.218142534394954	0.971325585583498	0.757690819186061	Indolepyruvate	203.054	64.1	203.058	21.6691339930795	C11H9NO3	[M]+	Indoles and derivatives	Indolyl carboxylic acids and derivatives	C00331	Amino acid metabolism	35656-49-6 / 392-12-1	HMDB0060484
M205T188.pos	Nodiff	0.634977592286313	0.954637107842332	0.546154645706014	Nodiff	0.773114944281813	0.911492438478081	0.342130419955399	L-Tryptophan	205.098	187.6	204.09	1.96460012543915	C11H12N2O2	[M+H]+	Indoles and derivatives	Indolyl carboxylic acids and derivatives	C00078	Cancer: overview; Nervous system; Digestive system; Translation; Amino acid metabolism; Infectious disease: parasitic	153-94-6	HMDB0013609
M205T69.pos	Nodiff	0.910804264787511	1.16789531319986	0.428510161661386	Nodiff	0.412730643457515	1.24630400083924	0.618723288679127	O-Acetylcarnitine	205.127	69.2	204.124	19.8706361138464	C9H18NO4	[M+H]+			C02571	Endocrine and metabolic disease	5080-50-2
M206T300.pos	Nodiff	0.463879840474674	0.912989112549854	0.507466702785437	Nodiff	0.202859306984553	0.858376539168206	0.835934217238916	Indolelactic acid	206.082	299.6	205.074	0.632237652877132	C11H11NO3	[M+H]+	Indoles and derivatives	Indolyl carboxylic acids and derivatives	C02043		1821-52-9	HMDB0000671
M207T82.pos	Nodiff	0.230364956463153	0.987698083787912	0.821670587377967	Nodiff	0.260767687637214	1.02008330693835	0.768121651691055	Monoethylglycinexylidide	207.151	82	206.142	4.44161786159053	C12H18N2O	[M+H]+	Carboxylic acids and derivatives	Amino acids, peptides, and analogues	C16561	Xenobiotics biodegradation and metabolism	7728-40-7	HMDB0060656
M208T292.pos	Nodiff	1.22113003360761	1.68063656037013	0.189307501561686	Nodiff	1.16515352054807	1.72768251011314	0.130009741420005	N-Acetyl-L-phenylalanine	208.098	292	207.089	5.17445854843108	C11H13NO3	[M+H]+	Carboxylic acids and derivatives	Amino acids, peptides, and analogues	C03519	Amino acid metabolism	2018-61-3	HMDB0000512
M209T105.pos	Nodiff	0.179597545641386	1.32152467345936	0.902987526556114	Nodiff	0.198569202237209	0.665931331118328	0.821070222490535	L-Kynurenine	209.093	104.8	208.085	4.78255858277856	C10H12N2O3	[M+H]+	Organooxygen compounds	Carbonyl compounds	C00328	Amino acid metabolism; Infectious disease: parasitic	2922-83-0/343-65-7	HMDB0000684
M209T268.pos	Nodiff	1.07134298277919	2.21014804210543	0.309476156491541	Nodiff	0.691807182788048	0.789864211909753	0.394050090234243	Pilocarpine	209.129	267.6	208.121	3.16625712903297	C11H16N2O2	[M+H]+			C07474		54-71-7 / 92-13-7	HMDB0015217
M209T467.pos	Nodiff	0.500040661970069	0.965498922939132	0.504841352674552	Nodiff	0.337311779080955	1.02720947631804	0.697102500391243	Myristoleic acid	209.191	466.7	226.193	24.0641442815862	C14H26O2	[M+H-H2O]+	Fatty Acyls	Fatty acids and conjugates	C08322		544-64-9/NA	HMDB0002000
M216T359.pos	Nodiff	0.281907512391767	0.989708150008449	0.902639163329834	Nodiff	0.14216648711304	1.09625513944547	0.839321674599424	12-Hydroxydodecanoic acid	216.197	358.5	216.173	6.97922092310261	C12H24O3	[M]+	Hydroxy acids and derivatives	Medium-chain hydroxy acids and derivatives	C08317		505-95-3	HMDB0002059
M218T316.pos	Nodiff	1.1222831402164	0.568334493269279	0.196522754663123	Nodiff	0.911412040780105	1.84774023207969	0.230613447122874	N-Acetylserotonin	218.213	316.4	218.106	6.27944522424627	C12H14N2O2	[M]+	Indoles and derivatives	Hydroxyindoles	C00978	Amino acid metabolism	1210-83-9	HMDB0001238
M218T82.pos	Nodiff	0.513770446806807	0.869032260776542	0.675326874669445	Nodiff	1.20400534169729	1.96156722690411	0.115074068033905	Propionylcarnitine	218.14	82.4	217.131	5.11558184254895	C10H19NO4	[M+H]+	Fatty Acyls	Fatty acid esters	C03017		17298-37-2	HMDB0000824
M219T358.pos	Nodiff	0.569888790540071	0.979772072141553	0.480277349307735	Nodiff	1.09902517607985	1.74255476404559	0.163055103367385	Capsidiol	219.175	358.3	236.178	1.36876799921495	C15H24O2	[M+H-H2O]+	Prenol lipids	Sesquiterpenoids	C09627		37208-05-2	HMDB0002352
M220T112.pos	Nodiff	1.01416357213623	1.31164357612569	0.293679624738013	Nodiff	0.0858546182061541	1.18027098607226	0.884188347336196	Pantothenic acid	220.119	111.8	219.111	4.65202912970268	C9H17NO5	[M+H]+	Alcohols and polyols	Polyols	C00864	Metabolism of cofactors and vitamins; Metabolism of other amino acids; Digestive system	79-83-4 / 20938-62-9 / 137-08-6	HMDB0000210
M221T517.neg	Nodiff	1.35633571322624	0.0985810185053001	0.0915750611573575	Up	1.66337487463639	256.535807958601	0.00274802046996534	N-Acetyl-D-glucosamine	221.155	517.4	221.09	4.53216621639002	C8H15NO6	[M]-	Organooxygen compounds	Carbohydrates and carbohydrate conjugates	C00140	Carbohydrate metabolism; Membrane transport	7512-17-6	HMDB0000215
M223T406.pos	Nodiff	1.45185905902058	1.36037	0.18253734865333	Nodiff	0.917355474605432	0.743050953174214	0.233853828712572	Apiole	223.097	405.6	222.089	4.58992144690561	C12H14O4	[M+H]+	Benzodioxoles		C10429		523-80-8	HMDB0033776
M223T628.neg	Nodiff	0.107439107042658	1.03914306202409	0.892422759131405	Nodiff	0.00430448610155006	0.978967969969452	0.96215796561027	Thymidine	223.029	628.4	242.09	3.62113552640998	C10H14N2O5	[M-H2O-H]-	Pyrimidine nucleosides	Pyrimidine 2'-deoxyribonucleosides	C00214	Nucleotide metabolism	50-89-5	HMDB0000273
M224T94.pos	Nodiff	0.31714829756942	1.20129864929545	0.783891247969725	Nodiff	1.07334188499621	0.785255662089697	0.191701429316621	Hydroxykynurenine	223.99	93.7	224.08	7.32530359809619	C10H12N2O4	[M]+	Organooxygen compounds	Carbonyl compounds	C02794		484-78-6 / 2147-61-7	HMDB0000732
M226T636.pos	Nodiff	0.204784336610488	1.10623207320071	0.845663756507983	Nodiff	0.317706626470011	1.32088656218766	0.677691438908055	Porphobilinogen	226.182	635.6	226.095	4.61022922737423	C10H14N2O4	[M]+	Organonitrogen compounds	Amines	C00931	Metabolism of cofactors and vitamins	487-90-1	HMDB0000245
M226T71.pos	Nodiff	0.118287809189187	0.982415289619401	0.869266074394654	Nodiff	1.05510661874237	0.908784709377686	0.191639097599646	Chorismate	226.046	70.6	226.048	4.70922295092871	C10H10O6	[M]+	Carboxylic acids and derivatives	Dicarboxylic acids and derivatives	C00251	Amino acid metabolism; Metabolism of cofactors and vitamins	55508-12-8 / 617-12-9	HMDB0012199
M227T585.neg	Nodiff	1.18346788568654	0.667613898295034	0.187402110561841	Nodiff	0.28737362959919	0.816261769312618	0.667423498968275	Myristic acid	227.202	585.1	228.209	2.09505105803127	C14H28O2	[M-H]-	Fatty Acyls	Fatty acids and conjugates	C06424	Lipid metabolism	544-63-8	HMDB0000806
M228T644.pos	Nodiff	0.169089477908033	0.922932131088415	0.818059910201523	Nodiff	0.281160568202793	1.10034845125267	0.743669967823593	Deoxyuridine	228.197	644	228.075	4.95787225168904	C9H12N2O5	[M]+	Pyrimidine nucleosides	Pyrimidine 2'-deoxyribonucleosides	C00526	Membrane transport; Nucleotide metabolism	951-78-0	HMDB0000012
M229T240.neg	Down	1.52645636696051	0.410306719513527	0.0481391594390465	Up	1.77595692431563	16.4700771366544	0.00024422525662235	Dodecanedioic acid	229.145	240.4	230.152	3.38649756290828	C12H22O4	[M-H]-	Fatty Acyls	Fatty acids and conjugates	C02678		693-23-2	HMDB0000623
M229T297.neg	Nodiff	0.845708904295975	1.40103199215143	0.346945720890448	Nodiff	1.19991120381936	0.44791323879783	0.0633081540218055	Beta-L-arabinose 1-phosphate	229.018	297.2	230.019	26.5313696067952	C5H11O8P	[M-H]-	Organic oxides	Alcohols and polyols	C03906	Carbohydrate metabolism		HMDB0012195
M232T149.pos	Nodiff	0.975431560126095	0.762629823505611	0.187676595413401	Nodiff	0.325105311199978	0.966699946290706	0.667857396541421	Butyryl-L-carnitine	232.156	149.4	231.147	2.26109884062278	C11H21NO4	[M+H]+			C02862		25576-40-3	HMDB02013
M233T425.pos	Nodiff	0.945093540150194	0.145949242966664	0.2925962639402	Nodiff	1.41272334377429	18.3618139299164	0.0509860617304292	Alantolactone	233.155	425	232.146	4.7703162533125	C15H20O2	[M+H]+	Naphthofurans		C09289		546-43-0	HMDB0035906
M235T270.pos	Nodiff	1.33468511596227	1.34698525962363	0.141637962287082	Down	1.84792334476525	0.560617170343848	0.00488768819377297	Lidocaine	235.181	269.8	234.173	4.25203513033455	C14H22N2O	[M+H]+	Benzene and substituted derivatives	Xylenes	C07073	Xenobiotics biodegradation and metabolism	137-58-6	HMDB0014426
M241T613.neg	Down	1.53133057728004	0.334767845667074	0.0473499440094231	Up	1.72017852135907	18.4464771211324	0.000521377070292396	Pentadecanoic acid	241.218	612.7	242.225	2.80244426203089	C15H30O2	[M-H]-	Fatty Acyls	Fatty acids and conjugates	C16537		1002-84-2	HMDB0000826
M242T398.pos	Nodiff	0.0417531114062931	0.987852990787581	0.864153902629706	Nodiff	0.0355275933536362	0.997095513418894	0.965787539287226	Equol	242.285	398.4	242.094	2.60862400651855	C15H14O3	[M]+	Isoflavonoids	Isoflavans	C14131		531-95-3	HMDB0002209
M243T197.pos	Nodiff	0.892935709077128	0.979751307891261	0.345656439948911	Nodiff	0.736215910434512	1.0157797826074	0.375340424220011	1-Hexadecanol	243.184	197.3	242.261	5.1081237140099	C16H34O	[M+H]+	Fatty Acyls	Fatty alcohols	C00823	Lipid metabolism	36653-82-4	HMDB0003424
M243T312.pos	Down	1.67418231149414	0.352878940312785	0.0498508261641669	Up	2.0779742515629	23.5571355023977	0.0001135669905666	Lumichrome	243.089	312.3	242.08	4.77999156271553	C12H10N4O2	[M+H]+			C01727	Metabolism of cofactors and vitamins	1086-80-2
M243T70.neg	Nodiff	0.56379456001299	0.657494356508586	0.529951922094573	Nodiff	1.24380150717668	5.81116834505905	0.0516647469169749	Uridine	243.063	70.2	244.07	3.19258792988602	C9H12N2O6	[M-H]-	Pyrimidine nucleosides		C00299	Membrane transport; Nucleotide metabolism	58-96-8	HMDB0000296
M245T85.pos	Up	2.20711443177173	5.60969285363807	0.0139124832878693	Down	1.95638269197978	0.0924234403326756	0.00502847090246201	beta-Alanyl-L-arginine	245.151	85.3	245.149	3.22595205478687	C9H19N5O3	[M]+	Peptidomimetics	Hybrid peptides	C05340	Metabolism of other amino acids		HMDB0060441
M246T42.neg	Nodiff	0.556823553629122	0.586426529801666	0.544693481387175	Nodiff	0.917452900503166	2.57702480919662	0.166256950758651	N-Succinyl-L-glutamate	246.062	41.9	247.069	1.93447239724878	C9H13NO7	[M-H]-	Carboxylic acids and derivatives	Amino acids, peptides, and analogues	C05931	Amino acid metabolism	33981-72-5
M249T70_1.neg	Nodiff	0.682389074239486	0.81075266360353	0.406999420889001	Up	1.75125151299764	89.5716397873806	4.29153287474421e-05	gamma-Glutamylcysteine	248.961	70.5	250.062	2.04320926960467	C8H14N2O5S	[M-H]-	Carboxylic acids and derivatives	Amino acids, peptides, and analogues	C00669	Cell growth and death; Metabolism of other amino acids	636-58-8	HMDB0001049
M250T89.pos	Nodiff	0.2348560738845	1.36261138686967	0.706244578142376	Nodiff	0.236636641436394	1.32382798097522	0.736552705418465	Adenosine	250.095	88.9	267.097	21.7277608330111	C10H13N5O4	[M+H-H2O]+	Purine nucleosides		C00212	Circulatory system; Membrane transport; Signal transduction; Endocrine system; Neurodegenerative disease; Signaling molecules and interaction; Nucleotide metabolism; Substance dependence	58-61-7	HMDB0000050
M253T257.neg	Nodiff	1.47397550769601	0.459455736117037	0.0590725720167925	Up	1.62923368887085	5.63124023683956	0.000659869021057907	Shikimate 3-phosphate	253.018	257	254.019	24.014678454472	C7H11O8P	[M-H]-	Carboxylic acids and derivatives	Alcohols and polyols	C03175	Amino acid metabolism	63959-45-5
M253T334.neg	Nodiff	0.648662828074587	0.683555859126231	0.467201710220827	Up	1.39734589972149	6.68905328112147	0.0110803064138678	2,7,4'-Trihydroxyisoflavanone	253.051	334.1	272.068	3.51708995502227	C15H12O5	[M-H2O-H]-	Benzene and substituted derivatives	1-benzopyrans	C15567
M255T337.pos	Nodiff	0.200678703454645	0.980407538837784	0.919286988509449	Nodiff	1.13747143087686	1.57142007800094	0.158495716560703	Daidzein	255.067	336.9	254.058	6.27286655886329	C15H10O4	[M+H]+	Isoflavonoids	Isoflav-2-enes	C10208		486-66-8	HMDB0003312
M255T642.neg	Nodiff	0.869399326546915	0.706022517835805	0.303134517867704	Up	1.55385511404627	3.58999194076676	0.00325138215252698	Palmitic acid	255.234	641.6	256.24	2.64855410885779	C16H32O2	[M-H]-	Fatty Acyls	Fatty acids and conjugates	C00249	Lipid metabolism	1957-10-03	HMDB0000220
M265T244.pos	Nodiff	0.0936007955370708	1.17654269628018	0.994105709760723	Down	1.77511005109992	0.164548773191957	0.0150736553288561	Mirtazapine	265.156	243.8	265.158	2.48861204844493	C17H19N3	[M]+	Piperazinoazepines		C07570		61337-67-5 / 85650-52-8	HMDB0014514
M267T458.neg	Nodiff	0.860793714485705	1.73798231277915	0.281938317554647	Nodiff	0.373423522421952	0.466409667857807	0.593528054223981	Formononetin	267.197	458.1	268.074	19.5011487076893	C16H12O4	[M-H]-	Isoflavonoids	O-methylated isoflavonoids	C00858		485-72-3	HMDB0005808
M267T71.neg	Nodiff	0.413236005019543	1.36759854393759	0.634833899274963	Nodiff	1.19386306956236	3.5335501838977	0.0625540942605848	Inosine	267.074	70.6	268.081	0.658994127664187	C10H12N4O5	[M-H]-	Purine nucleosides		C00294	Membrane transport; Nucleotide metabolism	58-63-9	HMDB0000195
M269T367.neg	Nodiff	1.00345552077079	0.608264059172396	0.22668332173329	Up	1.67948200015912	25.4855819935746	0.000217053186856819	Apigenin	269.046	366.9	270.053	1.52393700874069	C15H10O5	[M-H]-	Flavonoids	Flavones	C01477		520-36-5	HMDB0002124
M269T503.neg	Nodiff	1.36816096841244	1.7395882808867	0.119534090152422	Nodiff	0.907153177980494	0.616700770076945	0.152849192839908	Dehydroepiandrosterone	269.212	503.4	288.209	0.842496462702667	C19H28O2	[M-H2O-H]-	Steroids and steroid derivatives	Androstane steroids	C01227	Lipid metabolism; Cancer: overview; Endocrine system; Cancer: specific types	53-43-0	HMDB0000077
M269T615.pos	Nodiff	0.0913394167167552	0.957981371124761	0.811550552175521	Down	1.76245616261221	0.569594549889084	0.0116083731360251	Retinol	269.228	614.7	286.23	3.04123832593008	C20H30O	[M+H-H2O]+			C00473	Metabolism of cofactors and vitamins; Digestive system	68-26-8 11103-57-4 / 11103-57-4 / 68-26-8
M270T244.neg	Nodiff	0.048184499978081	0.966276736489637	0.951623836338685	Up	1.63032635537593	26.8896333291296	0.000623998851300516	Sulfamethizole	270.026	243.7	270.024	7.40668045547215	C9H10N4O2S2	[M]-	Benzene and substituted derivatives	Benzenesulfonamides	C08050		144-82-1	HMDB0014715
M272T252.pos	Nodiff	0.691534270298757	1.17030808143225	0.501383770655903	Nodiff	0.44314661990154	0.70170789124804	0.584573452871598	17a-Estradiol	272.187	252.2	272.178	6.6634231245904	C18H24O2	[M]+	Steroids and steroid derivatives	Estrane steroids	C02537	Lipid metabolism	57-91-0	HMDB0000429
M273T407.pos	Nodiff	0.423360303079139	1.05583965259749	0.709541891973536	Nodiff	0.544613891629453	0.938912306308716	0.510573512953117	Estradiol	273.256	406.7	272.178	5.97504623507348	C18H24O2	[M+H]+	Steroids and steroid derivatives	Estrane steroids	C00951	Cancer: overview; Excretory system; Endocrine system; Lipid metabolism; Environmental adaptation; Cancer: specific types	50-28-2	HMDB0000151
M276T74.pos	Nodiff	0.291594416071328	1.0129589968429	0.782598149581035	Nodiff	1.16047798466272	2.01413922866907	0.135717911669201	4-Hydroxycinnamoylagmatine	276.146	74.3	276.159	5.93844706614518	C14H20N4O2	[M]+	Cinnamic acids and derivatives	Hydroxycinnamic acids and derivatives	C04498	Amino acid metabolism	7295-86-5	HMDB0033460
M277T581.neg	Nodiff	0.264344803200562	0.561642595758693	0.792327344469985	Nodiff	0.763370597921876	3.9230649882195	0.251012700028948	Alpha-Linolenic acid	277.217	580.7	278.225	0.634880553910004	C18H30O2	[M-H]-	Fatty Acyls	Lineolic acids and derivatives	C06427	Lipid metabolism	463-40-1	HMDB0001388
M279T546.pos	Up	1.8017068006194	2.46713260438131	0.0473641297221496	Down	1.80127281271189	0.356274572257588	0.0125924611886778	Dibutyl phthalate	279.161	545.9	278.152	5.06810956428936	C16H22O4	[M+H]+	Benzene and substituted derivatives	Benzoic acids and derivatives	C14214		84-74-2	HMDB0033244
M279T662.neg	Nodiff	0.767488352881229	0.803566317025382	0.347042780273606	Nodiff	1.05068675531821	1.86094534787383	0.0946199281595504	Bovinic acid	279.228	661.9	280.24	16.9180620009375	C18H32O2	[M-H]-	Fatty Acyls	Lineolic acids and derivatives	C04056	Lipid metabolism	2540-56-9	HMDB0003797
M280T582.pos	Down	1.92627942089245	0.523795738017271	0.0257599474578484	Nodiff	1.45334573600213	2.74349580534366	0.0704907757900509	Linoleic acid	280.264	582.2	280.24	5.25289948812238	C18H32O2	[M]+	Fatty Acyls	Lineolic acids and derivatives	C01595	Lipid metabolism	60-33-3	HMDB0000673
M281T528.neg	Nodiff	0.103667143851971	0.559234074557303	0.921891416149374	Nodiff	0.666643840052255	5.35619181985424	0.301363621782666	Vaccenic acid	281.255	527.7	282.256	21.2476524827525	C18H34O2	[M-H]-	Fatty Acyls	Fatty acids and conjugates	C08367		693-72-1	HMDB0003231
M281T650.neg	Nodiff	1.48383110630618	0.615291775065543	0.0648990120127257	Up	1.65676014427389	3.23095595196475	0.000863092462696881	(6Z)-Octadecenoic acid	281.249	650.2	282.256	0.981337171399739	C18H34O2	[M-H]-			C08363		593-39-5
M282T469.pos	Nodiff	0.130186115797112	1.02305377566864	0.88210508587189	Nodiff	0.166019086404837	0.9203940916596	0.81776198496943	Sphingosine	282.28	468.5	299.282	19.2503624055362	C18H37NO2	[M+H-H2O]+	Organonitrogen compounds	Amines	C00319	Lipid metabolism; Cell growth and death; Signal transduction	123-78-4	HMDB0000252
M282T667.pos	Nodiff	1.07754007922217	0.646094218833008	0.190339451205432	Nodiff	0.0829146776370121	0.920261397766579	0.912954843299313	Oleic acid	282.275	666.5	282.256	5.75325276651224	C18H34O2	[M-H2O+NH4]+	Fatty Acyls	Fatty acids and conjugates	C00712	Lipid metabolism	112-80-1	HMDB0000207
M282T686.pos	Nodiff	0.763833490234309	1.19119526855244	0.510628913351981	Nodiff	0.632674224589992	0.778757098840779	0.434275140994235	Oleamide	282.275	686.2	281.272	14.8791125247967	C18H35NO	[M+H]+	Fatty Acyls	Fatty amides	C19670		301-02-0	HMDB0002117
M283T368.neg	Nodiff	0.257286077361154	0.984659836310737	0.767206079540551	Nodiff	1.01762030349139	5.30523734402169	0.0998745599746406	Xanthosine	283.068	367.9	284.076	1.14459958267117	C10H12N4O6	[M-H]-	Azacyclic compounds	Alcohols and polyols	C01762	Membrane transport; Biosynthesis of other secondary metabolites; Nucleotide metabolism	146-80-5	HMDB0000299
M283T549.neg	Nodiff	0.966815927484645	0.676294844039121	0.228232328652651	Nodiff	0.640079017280818	0.773945107916847	0.322063363581711	2-Methoxyestradiol	283.171	549.2	302.188	3.84926558496421	C19H26O3	[M-H2O-H]-	Steroids and steroid derivatives	Estrane steroids	C05302	Lipid metabolism	362-07-2	HMDB0000405
M283T689.neg	Nodiff	1.23037406908747	0.430427031479499	0.119072990842743	Up	1.6686926162043	32.2780992202112	0.00200882872984722	Guanosine	283.267	688.7	283.092	11.3932343525233	C10H13N5O5	[M]-	Purine nucleosides		C00387	Membrane transport; Nucleotide metabolism	118-00-3	HMDB0000133
M284T252.pos	Nodiff	0.305618334244886	1.00289969569715	0.818570509023422	Nodiff	0.859672490328635	0.941010823133499	0.288236925889759	Stearic acid	284.186	251.8	284.272	4.42778710579226	C18H36O2	[M]+	Fatty Acyls	Fatty acids and conjugates	C01530	Lipid metabolism	57-11-4 / 646-29-7	HMDB0000827
M284T560.pos	Nodiff	1.38958556392562	1.44700940496088	0.158071320997686	Nodiff	0.811505805244149	1.1616739523459	0.309269403664034	Octadecanamide	284.293	560.1	283.288	4.84007	C18H37NO	[M+H]+	Fatty Acyls	Fatty amides	C13846		124-26-5	HMDB0034146
M285T361.neg	Nodiff	0.838013967514028	1.10806919163259	0.31033685986419	Nodiff	0.734044933046093	0.930148011777371	0.260539740783573	Hexadecanedioate	285.207	361.3	286.214	0.617095004067381	C16H30O4	[M-H]-	Fatty Acyls	Fatty acids and conjugates	C19615		505-54-4	HMDB0000672
M289T73.neg	Nodiff	0.216059299010061	1.07465306205394	0.77163336135737	Nodiff	1.15882858811847	2.10867920258093	0.076658693493009	Epiandrosterone	288.953	73.2	290.225	2.01419118534823	C19H30O2	[M-H]-	Steroids and steroid derivatives	Androstane steroids	C07635		481-29-8	HMDB0000365
M293T499.neg	Nodiff	0.724970354245479	0.406379616483345	0.450518170750674	Nodiff	0.769594847669656	3.43540084828283	0.267109676065692	13-L-Hydroperoxylinoleic acid	293.212	499.5	312.23	2.35324290521159	C18H32O4	[M-H2O-H]-	Fatty Acyls	Lineolic acids and derivatives	C04717	Lipid metabolism	33964-75-9	HMDB0003871
M295T44.pos	Nodiff	0.727383084982113	1.19951813939195	0.490961175501736	Nodiff	0.728966048299241	0.430127359575595	0.356295567117021	Indican	294.94	43.7	295.106	3.3776081365914	C14H17NO6	[M]+			C08481		487-60-5
M295T481.neg	Nodiff	0.183170722857983	1.12339073272546	0.77074483070074	Nodiff	0.195115657653677	1.04837892366012	0.784908253780172	9,10-Epoxyoctadecenoic acid	295.228	480.6	296.235	1.01616309024131	C18H32O3	[M-H]-	Fatty Acyls	Fatty acids and conjugates	C14825	Lipid metabolism		HMDB0004701
M295T531.neg	Nodiff	1.41261843284021	0.548239365760653	0.0728557617595213	Up	1.65579736828924	42.9872830638845	0.00207640303547281	13S-hydroxyoctadecadienoic acid	295.228	530.6	296.235	0.677442289560646	C18H32O3	[M-H]-	Fatty Acyls	Lineolic acids and derivatives	C14762	Lipid metabolism; Endocrine system	5204-88-6/29623-28-7	HMDB0004667
M296T46.pos	Nodiff	0.222830507514165	1.01907781809497	0.772255128473988	Down	1.95629946057473	0.56214005875957	0.00292494874043286	Dehypoxanthine futalosine	296.067	45.8	296.09	1.77025206132696	C14H16O7	[M]+			C17010	Metabolism of cofactors and vitamins
M297T514.neg	Nodiff	1.32346106959511	1.54747651062002	0.177294602353804	Nodiff	0.527976687702645	1.49167161918673	0.410921777358372	Nonadecanoic acid	297.244	514.1	298.287	2.59348530704423	C19H38O2	[M-H]-	Fatty Acyls	Fatty acids and conjugates	C16535		646-30-0	HMDB0000772
M297T633.pos	Down	2.03351418876084	0.041292506293316	0.011442453570939	Nodiff	1.27829664772269	12.4570198368845	0.0961148032813037	Tridemorph	297.297	633.3	297.303	21.4091805393282	C19H39NO	[M]+	Oxazinanes	Morpholines	C11285		c("24602-86-6", "81412-43-3", "NA")	HMDB0031810
M298T165.pos	Nodiff	0.292423052481765	1.00118690222455	0.8159836757474	Nodiff	0.627908420770471	0.855167812541027	0.440870039498712	5'-Methylthioadenosine	298.098	164.7	297.09	2.46139726104995	C11H15N5O3S	[M+H]+	5'-deoxyribonucleosides	5'-deoxy-5'-thionucleosides	C00170	Amino acid metabolism	2457-80-9	HMDB0001173
M299T556.neg	Nodiff	1.03409708692485	1.13601940329782	0.25373438469991	Nodiff	0.0947894063058472	0.999614324492219	0.900906200575848	all-trans-Retinoic acid	299.202	556.1	300.209	0.922454035359172	C20H28O2	[M-H]-	Prenol lipids	Retinoids	C00777	Cancer: overview; Immune system; Metabolism of cofactors and vitamins; Cancer: specific types	302-79-4	HMDB0001852
M300T588_1.pos	Nodiff	0.324545009683914	1.40717146962583	0.641099546592376	Nodiff	0.252552727832284	1.30657433085051	0.777816999088065	Palmitoylethanolamide	300.291	588	299.282	2.99709681222607	C18H37NO2	[M+H]+	Carboximidic acids and derivatives	Carboximidic acids	C16512	Signaling molecules and interaction	544-31-0	HMDB0002100
M301T234.neg	Nodiff	0.761291184996166	0.518263621785177	0.395442525405324	Nodiff	0.126602838754509	1.82241570863869	0.826838541061936	Quercetin	301.039	233.9	302.043	12.8753953389074	C15H10O7	[M-H]-	Flavonoids	Flavones	C00389	Signal transduction	117-39-5	HMDB0005794
M301T573.neg	Nodiff	0.0970776440449252	0.994666420073368	0.912088126984006	Nodiff	0.912700665706334	1.72722784309718	0.174157323238546	19(S)-HETE	301.217	572.5	320.235	2.62268958475175	C20H32O3	[M-H2O-H]-	Fatty Acyls	Eicosanoids	C14749	Lipid metabolism	79551-85-2/115461-40-0	HMDB0011136
M302T419.pos	Nodiff	0.649738362778571	0.979525519236392	0.48190046638335	Nodiff	0.527033923789133	1.18588162406308	0.545076044240402	Eicosapentaenoic Acid	302.216	419.3	302.225	28.7218640714447	C20H30O2	[M]+			C06428	Lipid metabolism	10417-94-4	HMDB01999
M302T481.pos	Nodiff	1.52368160694402	0.618797833153499	0.0934095795745711	Up	1.65618134420026	3.94932415177427	0.0289492992333635	Sphinganine	302.306	481	301.298	3.30790218128479	C18H39NO2	[M+H]+	Organonitrogen compounds	Amines	C00836	Lipid metabolism; Signal transduction	764-22-7	HMDB0000269
M303T599.neg	Down	1.73015976198039	0.438852914713042	0.0200220248138897	Up	1.7691144900014	11.0030202782224	8.84860637551457e-06	Arachidonic acid	303.233	599.2	304.24	1.06848669976325	C20H32O2	[M-H]-	Fatty Acyls	Fatty acids and conjugates	C00219	Circulatory system; Cell growth and death; Nervous system; Sensory system; Endocrine system; Lipid metabolism; Immune system; Infectious disease: parasitic	506-32-1	HMDB0001043
M309T435.neg	Nodiff	1.50256664914933	0.688729411854003	0.118373972385063	Nodiff	0.911074181412032	1.59956435826883	0.154580376211892	Ribose 1,5-bisphosphate	309.174	435.1	309.986	0.431151329168864	C5H12O11P2	[M-H]-	Organooxygen compounds	Carbohydrates and carbohydrate conjugates	C01151	Carbohydrate metabolism; Metabolism of other amino acids	14689-84-0	HMDB0011688
M311T553.neg	Nodiff	0.3387051538767	0.943637565523514	0.695896478171176	Nodiff	0.524722163350179	1.13632599274688	0.434282145791835	Levonorgestrel	311.202	552.9	312.209	0.642669598118261	C21H28O2	[M-H]-	Steroids and steroid derivatives	Estrane steroids	C08153		797-63-7/6533-00-2	HMDB0014511
M311T670.neg	Nodiff	0.125524472880864	0.801310008505757	0.891247754199621	Nodiff	0.633899571269007	2.53109082586726	0.330294341403951	Arachidic acid	311.296	670	312.303	1.18142717911087	C20H40O2	[M-H]-	Fatty Acyls	Fatty acids and conjugates	C06425	Lipid metabolism	506-30-9	HMDB0002212
M312T557.pos	Nodiff	0.809422638796556	1.33385245431363	0.36445006043523	Nodiff	0.426177190095608	1.18026121555501	0.611851486754055	Aflatoxin B1	312.364	556.6	312.063	2.5645173670726	C17H12O6	[M]+	Coumarins and derivatives	Furanocoumarins	C06800	Xenobiotics biodegradation and metabolism; Cancer: specific types	1162-65-8	HMDB0006552
M313T402.neg	Down	1.56892999731855	0.511635732529672	0.0416569524900101	Up	1.7247062409063	14.7074651526545	0.000332928798417774	12,13-DHOME	313.239	402.3	314.246	0.561872004313613	C18H34O4	[M-H]-	Fatty Acyls	Fatty acids and conjugates	C14829	Lipid metabolism		HMDB0004705
M314T165.pos	Nodiff	0.267589677944252	1.14807226873245	0.656918844295916	Up	1.62352372381078	3.35797152262927	0.0387210776858775	Geranyl diphosphate	314.093	164.8	314.068	2.12151102475969	C10H20O7P2	[M]+			C00341	Metabolism of cofactors and vitamins; Metabolism of terpenoids and polyketides	763-10-0
M316T391.pos	Nodiff	0.335377222729699	0.960584311116057	0.649669635357557	Nodiff	1.3200455471689	0.169858932620943	0.081732911052604	Decanoyl-L-carnitine	316.249	391.1	315.241	0.901218361214238	C17H33NO4	[M+H]+			C03299		3992-45-8	HMDB00651
M319T499.neg	Nodiff	1.01660020545806	1.19130290218792	0.255210496354511	Nodiff	0.526395499092614	0.887922637542575	0.436266004523927	20-HETE	319.228	499.2	320.235	1.5662766847969	C20H32O3	[M-H]-	Fatty Acyls	Fatty acids and conjugates	C14748	Lipid metabolism; Circulatory system	79551-86-3	HMDB0005998
M321T604.pos	Nodiff	0.469681698924144	1.32439048246869	0.549179294967006	Nodiff	1.07345415074956	1.34189495419057	0.17735588547137	Pregnanediol	321.317	604.4	320.272	4.37564452806065	C21H36O2	[M+H]+	Steroids and steroid derivatives	Pregnane steroids	C05484	Lipid metabolism	80-92-2	HMDB0004025
M324T43.neg	Nodiff	0.279148926152056	1.12026205083909	0.760910342112312	Up	1.55346392524945	2.75940583217308	0.00225239201836394	N-Glycolylneuraminic acid	324.094	43.3	325.101	1.16015723838463	C11H19NO10	[M-H]-	Organooxygen compounds	Carbohydrates and carbohydrate conjugates	C03410	Carbohydrate metabolism	1113-83-3	HMDB0000833
M328T501.pos	Nodiff	0.015740925817596	0.778344514269151	0.912433279811747	Nodiff	0.353873471567035	1.88922077024037	0.657017430432788	N,N-Dimethylsphingosine	328.322	501.1	327.314	2.7412122066833	C20H41NO2	[M+H]+	Organonitrogen compounds	Amines	C13914		122314-67-4/119567-63-4	HMDB0013645
M329T607.neg	Nodiff	1.49409063381999	0.488018692843494	0.063275776613796	Up	1.71051486813194	8.36797565690786	0.000251058574643599	Docosapentaenoic acid (22n-3)	329.249	606.5	330.256	1.44571389866192	C22H34O2	[M-H]-	Fatty Acyls	Fatty acids and conjugates	C16513	Lipid metabolism	24880-45-3	HMDB0006528
M336T690.pos	Nodiff	1.47841854769973	0.484700331345566	0.094387394855333	Nodiff	0.877647175841151	1.58081400024194	0.25892315457229	12-Keto-tetrahydro-leukotriene B4	336.327	689.6	336.23	8.2791990304345	C20H32O4	[M]+	Fatty Acyls	Eicosanoids	C02165	Sensory system; Nervous system; Digestive system; Endocrine system; Lipid metabolism; Signaling molecules and interaction	71160-24-2	HMDB0002995
M338T653_1.pos	Nodiff	1.07432615380212	1.58511566267619	0.235492021582803	Nodiff	0.87191978273405	0.630254455113458	0.289633168729524	Erucic acid	338.341	653	338.318	0.207748168263662	C22H42O2	[M]+	Fatty Acyls	Fatty acids and conjugates	C08316	Lipid metabolism	112-86-7	HMDB0002068
M339T469.neg	Nodiff	1.45251573225267	0.893757284139656	0.0650271327111559	Nodiff	0.390531903438925	0.977401108585791	0.55949013152938	Fructose 1,6-bisphosphate	339.2	468.6	339.996	1.88791248525254	C6H14O12P2	[M-H]-	Organooxygen compounds	Carbohydrates and carbohydrate conjugates	C00354	Cancer: overview; Amino acid metabolism; Signal transduction; Endocrine system	488-69-7	HMDB0001058
M345T509.neg	Nodiff	0.27290656422783	0.877414013810185	0.779693728730988	Nodiff	0.168376923820355	0.775192072099848	0.785888231107823	Ginkgoic acid	345.243	509.4	346.251	0.289650721707925	C22H34O3	[M-H]-	Benzene and substituted derivatives	Benzoic acids and derivatives	C10794		22910-60-7	HMDB0033897
M346T455.pos	Nodiff	0.940240601576106	0.82060017722297	0.28900760026187	Nodiff	1.23194840934674	1.64406439397156	0.136412332303782	Cyclic GMP	346.333	454.6	345.047	2.99858658873188	C10H12N5O7P	[M+H]+	Purine nucleotides	Cyclic purine nucleotides	C00942	Circulatory system; Nervous system; Signal transduction; Sensory system; Endocrine system; Digestive system; Environmental adaptation; Nucleotide metabolism; Cellular community - eukaryotes; Immune system	7665-99-8	HMDB0001314
M347T389.pos	Nodiff	1.24619215559135	0.500690244087447	0.168399877323283	Up	2.09611632539493	33.2217833076154	0.00013701853847797	Corticosterone	347.223	388.9	346.214	2.94911594193756	C21H30O4	[M+H]+	Steroids and steroid derivatives	Hydroxysteroids	C02140	Lipid metabolism; Neurodegenerative disease; Endocrine system	50-22-6	HMDB0001547
M347T551_1.neg	Nodiff	0.114526869127341	0.991668397982649	0.917893104406242	Nodiff	1.19496711666456	0.848160792229339	0.0606780855644578	dGMP	347.172	551.1	347.063	0.192725188901873	C10H14N5O7P	[M]-	Purine nucleotides	Purine deoxyribonucleotides	C00362	Nucleotide metabolism	902-04-5	HMDB0001044
M357T490.pos	Nodiff	1.83543229835797	1.87808779259476	0.0759155036209404	Down	1.83220644798388	0.307212082739022	0.0135182464729486	(4Z,7Z,10Z,13Z,16Z,19Z)-Docosahexaenoic acid ethyl ester	357.28	489.6	356.272	3.42588446030912	C24H36O2	[M+H]+			C16185		81926-94-5
M360T261.pos	Nodiff	0.25298052674396	1.03614406402501	0.683662636789701	Nodiff	0.353190558949073	1.47606961989643	0.643501251888624	Rosmarinic acid	360.239	260.6	360.084	6.64014452625569	C18H16O8	[M]+	Cinnamic acids and derivatives	Hydroxycinnamic acids and derivatives	C01850	Amino acid metabolism	537-15-5 / 20283-92-5 537-15-5 / 20283-92-5	HMDB0003572
M361T542.pos	Nodiff	1.61971605607906	1.43941260964373	0.0566682552948796	Nodiff	0.588788774516038	0.923970383928939	0.49115248294509	Aldosterone	361.223	542.4	360.194	1.3272787846826	C21H28O5	[M+H]+	Steroids and steroid derivatives	Hydroxysteroids	C01780	Lipid metabolism; Excretory system; Endocrine system	52-39-1	HMDB0000037
M364T587.pos	Nodiff	0.203201515528051	1.05101240995432	0.827043174466775	Nodiff	0.869976948289085	1.13182096713217	0.304785020200619	GMP	364.344	586.9	363.058	2.70241501415942	C10H14N5O8P	[M+H]+	Purine nucleotides	Purine ribonucleotides	C00144	Sensory system; Signal transduction; Nucleotide metabolism	85-32-5	HMDB0001397
M369T618.pos	Nodiff	0.126453150677198	0.750972909336324	0.959407605626671	Nodiff	0.431670681556835	1.17987367196199	0.620118030258984	Cholesterol	369.348	618.3	386.355	0.092054230847224	C27H46O	[M+H-H2O]+	Steroids and steroid derivatives	Cholestane steroids	C00187	Endocrine and metabolic disease; Cancer: overview; Digestive system; Endocrine system; Lipid metabolism; Cancer: specific types	57-88-5	HMDB0000067
M371T476.neg	Nodiff	0.616737212131897	0.70025569322812	0.483750366851978	Nodiff	0.0300472569437442	0.866388159275412	0.976859264229581	Deoxycorticosterone acetate	371.065	476.1	372.23	1.50090454159446	C23H32O4	[M-H]-			C14554		56-47-3
M376T455_1.pos	Nodiff	0.0921805546167836	1.31430210514368	0.907794191123162	Nodiff	0.137247202029951	0.620196815245022	0.87285287821111	Riboflavin	376.261	454.7	376.138	4.75319605887477	C17H20N4O6	[M]+	Pteridines and derivatives	Alloxazines and isoalloxazines	C00255	Metabolism of cofactors and vitamins; Digestive system; Membrane transport	83-88-5	HMDB0000244
M376T515.pos	Nodiff	0.984752961676219	0.770646370340659	0.339212567918303	Nodiff	1.06348391322727	1.50108537995677	0.180707610100779	Lithocholic acid	376.314	514.9	376.298	3.81033440954571	C24H40O3	[M]+	Lipids and lipid-like molecules	Steroids and steroid derivatives	C03990	Digestive system	434-13-9	HMDB0000761
M384T654_1.pos	Nodiff	0.898990829941419	0.800135579914535	0.279006451240002	Nodiff	1.30076781180147	1.69733831358493	0.0863859918175046	Vitamin D3	384.347	653.7	384.339	20.2941612656654	C27H44O	[M]+	Steroids and steroid derivatives	Vitamin D and derivatives	C05443	Lipid metabolism; Immune disease; Digestive system	67-97-0	HMDB0000876
M393T251.pos	Nodiff	0.670152193899944	1.06760946153973	0.563506272451245	Nodiff	0.0410543825141635	1.04496664719225	0.954932002851555	Ursodeoxycholic acid	393.21	250.6	392.293	1.42928739095002	C24H40O4	[M+H]+	Steroids and steroid derivatives	Bile acids, alcohols and derivatives	C07880		128-13-2	HMDB0000946
M398T455.pos	Nodiff	0.306928639369485	1.08920320355183	0.696027359870352	Nodiff	0.912245039003389	0.753894330017361	0.276817164593157	S-Adenosylmethionine	398.242	454.7	398.137	0.956777481914791	C15H22N6O5S	[M]+			C00019	Amino acid metabolism; Folding, sorting and degradation	17176-17-9
M400T509_1.pos	Nodiff	0.124500626231141	1.01452999531211	0.953957642119446	Nodiff	0.845163190962383	0.844877398516911	0.303852059748195	Palmitoyl-L-carnitine	400.343	509.4	399.335	0.001147991775718	C23H45NO4	[M+H]+			C02990	Lipid metabolism	2364-67-2
M401T566.pos	Nodiff	1.29036488395837	1.3188910488824	0.250812517731181	Down	1.69923219244173	0.374749270278542	0.0125340581415691	7a,12a-Dihydroxy-5b-cholestan-3-one	401.343	566.5	418.345	13.5397344336814	C27H46O3	[M+H-H2O]+	Organic oxides	Alcohols and polyols	C05453	Lipid metabolism		HMDB0006887
M407T430_1.neg	Nodiff	0.57114783838338	0.955940410116154	0.493342694550734	Nodiff	0.121765263363372	1.00717662625729	0.849907378543386	1-palmitoyl-dihydroxyacetone-phosphate	407.219	430.4	408.228	3.25131040076256	C19H37O7P	[M-H]-	Carboxylic acids and derivatives	Carbohydrates and carbohydrate conjugates	C01192		17378-38-0	HMDB0062190
M408T587.pos	Nodiff	0.655584948955201	0.857970082738487	0.553817093556833	Nodiff	0.963633199519005	0.790838076875277	0.237535223181509	Allocholic acid	408.369	586.8	408.288	4.48464421892036	C24H40O5	[M]+	Steroids and steroid derivatives	Bile acids, alcohols and derivatives	C00695	Lipid metabolism; Digestive system	2464-18-8 / 81-25-4	HMDB0000505
M409T458.neg	Nodiff	1.15193845112152	3.12864810421821	0.15992945499893	Down	1.31461409629362	0.319853800999513	0.0423619439658044	LysoPA(16_0_0_0)	409.236	457.9	410.243	0	C19H39O7P	[M-H]-	Glycerophospholipids	Glycerophosphates	C04036			HMDB0007853
M415T463_2.pos	Nodiff	0.628730166365817	1.48866382615958	0.463427939534423	Nodiff	1.39255299447395	0.131756115903911	0.078870352039635	Sodium deoxycholate	415.211	462.7	414.275	2.46026552026514	C24H39O4. Na	[M+H]+			C11171		302-95-4
M426T513.pos	Nodiff	1.35891630291884	0.738344147947042	0.14909232980137	Up	2.11127310719976	12.0921673477255	0.00090373071812871	Lanosterin	426.322	512.9	426.386	2.9692889337354	C30H50O	[M]+	Prenol lipids	Triterpenoids	C01724	Lipid metabolism	79-63-0	HMDB0001251
M429T654.pos	Nodiff	0.79299170323195	1.12978068166274	0.45148379838552	Nodiff	0.68988528604795	1.07913067650817	0.402091979795943	24,25-Dihydrolanosterol	429.405	654.2	428.402	10.4237355631752	C30H52O	[M+H]+	Prenol lipids	Triterpenoids	C05109	Lipid metabolism	79-62-9	HMDB0006839
M430T299_2.pos	Nodiff	1.34261927116456	0.617037700612517	0.132669288433512	Up	1.86601794416632	12.0111160613866	0.0107199179502475	alpha-Tocopherol	430.251	299.1	430.381	18.3920216330046	C29H50O2	[M]+	Prenol lipids	Quinone and hydroquinone lipids	C02477	Metabolism of cofactors and vitamins; Cell growth and death; Digestive system	1959-02-09	HMDB0001893
M432T260.pos	Nodiff	0.984058502740429	1.20447536380146	0.326120333497464	Nodiff	0.0827605330954909	1.01341345621888	0.939879771733412	Gentamicin C1a	432.284	259.7	449.285	15.1150632454308	C19H39N5O7	[M+H-H2O]+			C00908	Biosynthesis of other secondary metabolites	26098-04-4
M449T687_1.neg	Nodiff	0.494821659584156	0.76185754263193	0.590920231264416	Nodiff	0.298280429750478	1.3475630171435	0.657444949936808	Glycochenodeoxycholic acid	449.309	686.7	449.314	1.3520907697205	C26H43NO5	[M]-			C05466	Lipid metabolism; Digestive system	16564-43-5
M465T557.neg	Nodiff	0.480415678265789	1.16263206560548	0.60040112845629	Nodiff	0.796628049285041	0.770744970654918	0.248137210317301	Cholesterol sulfate	465.303	556.7	466.312	2.36404942756283	C27H46O4S	[M-H]-	Steroids and steroid derivatives	Cholestane steroids	C18043	Lipid metabolism	1256-86-6	HMDB0000653
M468T585_1.pos	Nodiff	0.809531192099069	1.21105302439379	0.378767370728064	Nodiff	0.111870721238476	1.17186759652046	0.856842539000843	Deoxyuridine-5'-triphosphate	468.388	585.3	467.974	3.94576686694711	C9H15N2O14P3	[M+H]+			C00460	Nucleotide metabolism	102814-08-4	HMDB0001191
M496T539_3.pos	Nodiff	0.817381511336457	0.840580056226295	0.426259388781957	Up	2.02126661877824	3.82533818557634	0.000328822937870866	1-palmitoylglycerophosphocholine	496.351	539.3	496.34	19.3894850726365	C24H51NO7P	[M-H2O+NH4]+	Glycerophospholipids	Glycerophosphocholines	C04102		17364-16-8	HMDB0062541
M498T350.pos	Nodiff	1.25016475114836	0.589724394339154	0.155770836629313	Up	1.91060208794034	8.27575076631837	0.00284187686233321	Taurocholic acid	498.29	350.3	515.292	12.3100906619404	C26H45NO7S	[M+H-H2O]+	Steroids and steroid derivatives	Bile acids, alcohols and derivatives	C05122	Lipid metabolism; Metabolism of other amino acids; Digestive system	81-24-3	HMDB0000036
M516T487_2.pos	Nodiff	0.814945201589342	1.37968650143882	0.30034452502075	Up	2.1704430817816	3.69890876223188	2.73667581061824e-05	L-Olivosyl-oleandolide	516.305	486.7	516.293	23.0489097865065	C26H44O10	[M]+	Carboxylic acids and derivatives	Alcohols and polyols	C11991
M568T499_1.pos	Nodiff	0.210579902806229	1.14658767384246	0.74419526426382	Up	1.80430361609649	3.85695401238176	0.00514391832916191	Protoporphyrinogen IX	568.338	498.6	568.305	4.36165640540179	C34H40N4O4	[M]+	Tetrapyrroles and derivatives	Porphyrins	C01079	Metabolism of cofactors and vitamins	7412-77-3	HMDB0001097
M570T516.pos	Nodiff	0.623331636528644	1.45397786164659	0.443888695510053	Nodiff	1.30730666939247	2.13836499779019	0.0708759677081401	Avermectin B1b aglycone	570.36	516.4	570.319	5.95973081203533	C33H46O8	[M]+			C11963
M584T640_2.pos	Nodiff	0.292629768631844	0.840316374786587	0.855815167820886	Nodiff	1.35249612899375	0.459899150705919	0.0669333443667537	Bilirubin	584.485	639.8	584.264	18.7432206671408	C33H36N4O6	[M]+			C00486	Metabolism of cofactors and vitamins; Digestive system	635-65-4
M736T682_3.pos	Nodiff	1.02478037169744	1.28968427705033	0.346578344883365	Nodiff	0.195135065004584	1.12349329679334	0.78647992705263	1-Hexadecylthio-2-hexadecanoylamino-1,2-dideoxy-sn-glycero-3-phosphocholine	735.582	682.2	735.584	1.90325354394596	C40H84N2O5PS	[M]+			C04873		116457-99-9

## Sheet: Table S8
Table S8.The overlapping differentially abundant metabolites
BLM vs BLM+Lido	Ctrl vs BLM
M117T54.neg	M117T54.neg
M123T69.pos	M117T582.neg
M131T75.neg	M118T55.pos
M132T290.pos	M119T112.neg
M136T71.pos	M123T69.pos
M138T348.neg	M129T97.neg
M147T42.pos	M130T42.pos
M159T236.neg	M131T75.neg
M159T43_2.neg	M132T290.pos
M164T90.neg	M132T52.pos
M165T71.pos	M134T42.neg
M170T36.pos	M135T285.neg
M172T95.neg	M136T44.neg
M173T147.neg	M136T71.pos
M185T301.pos	M138T348.neg
M229T240.neg	M145T45.neg
M241T613.neg	M147T42.pos
M243T312.pos	M147T686.pos
M245T85.pos	M151T70.pos
M279T546.pos	M154T74.pos
M280T582.pos	M159T236.neg
M297T633.pos	M159T43_2.neg
M303T599.neg	M164T90.neg
M313T402.neg	M165T71.pos
	M166T103.neg
	M172T230.pos
	M172T95.neg
	M173T147.neg
	M174T43.neg
	M175T44_2.pos
	M181T58.neg
	M182T310.pos
	M182T91.neg
	M188T188.pos
	M189T84.pos
	M198T419.neg
	M221T517.neg
	M229T240.neg
	M235T270.pos
	M241T613.neg
	M243T312.pos
	M245T85.pos
	M249T70_1.neg
	M253T257.neg
	M253T334.neg
	M255T642.neg
	M265T244.pos
	M269T367.neg
	M269T615.pos
	M270T244.neg
	M279T546.pos
	M281T650.neg
	M283T689.neg
	M295T531.neg
	M296T46.pos
	M302T481.pos
	M303T599.neg
	M313T402.neg
	M314T165.pos
	M324T43.neg
	M329T607.neg
	M347T389.pos
	M357T490.pos
	M401T566.pos
	M409T458.neg
	M426T513.pos
	M430T299_2.pos
	M496T539_3.pos
	M498T350.pos
	M516T487_2.pos
	M568T499_1.pos

## Sheet: Table S9
Table S9. Spearman correlation analysis between differential genus and metabolites
	Bacillus		Niallia		Kurthia		Staphylococcus		Carnobacterium		Streptococcus		Blautia		Chryseobacterium		Epilithonimonas		Sphingomonas		Burkholderia		Ralstonia		Rhodoferax		Citrobacter		Enterobacter		Pantoea		Rahnella		Acinetobacter		Pseudomonas		Stutzerimonas
metabolites	r	P value	r	P value	r	P value	r	P value	r	P value	r	P value	r	P value	r	P value	r	P value	r	P value	r	P value	r	P value	r	P value	r	P value	r	P value	r	P value	r	P value	r	P value	r	P value	r	P value
shikimic acid	-0.342184	0.194529191119844	0.447260569250993	0.0823817716521476	-0.606634	0.012719142518397	-0.434296	0.0927844984473989	0.125159744474127	0.644187678721338	0.0840168050416806	0.757052724320426	0.359227111514511	0.171786735162236	-0.373529	0.154122469896848	-0.432353	0.094421037534787	-0.467647	0.067760850190154	-0.164706	0.542148135201078	0.0301992169444568	0.91159857370074	0.561705435166897	0.023554887934656	0.472812456090183	0.0643785714594806	0.382440196895777	0.143760142764507	0.616064025666919	0.0110503777612496	-0.211765	0.431083247239221	-0.341176	0.195932624867889	0.473529411764706	0.0639190718268201	0.411551041513714	0.113239523403205
L-isoleucine	-0.451329	0.0792972591965882	0.67089085387649	0.00444261401714496	-0.486853	0.0558104037059901	-0.25604	0.338481115499151	0.118007759075605	0.663368395360959	-0.196039	0.466824849026551	0.601782169716616	0.0136515493537342	-0.679412	0.00379343266915975	-0.808824	0.000148475592232346	-0.579412	0.0186625294177119	0.126470588235294	0.640694440816884	-0.261223	0.328448591625361	0.708171637347512	0.00214085362328875	0.642459450301942	0.00727880401026024	0.657926779405447	0.00559838287072575	0.841048191903122	0.0000446647828117444	-0.282353	0.289349829063274	-0.426471	0.0994991119375399	0.564705882352941	0.0226632048441846	0.780690334474487	0.000358174474257611
L-lysine	-0.365783	0.16353013316804	0.683854928347533	0.00348655699661805	-0.343888	0.192171501804492	-0.22363	0.405080874756285	0.321839342933468	0.224136506453292	-0.196039	0.466824849026551	0.555727411830141	0.0254116752187922	-0.567647	0.021814592143743	-0.747059	0.000882106992984634	-0.538235	0.0314932282058384	0.0235294117647059	0.931073583667659	-0.274813	0.302968050422709	0.652303086000267	0.00616903404286925	0.563919175203905	0.0228944436759649	0.573660295343665	0.0201560086427867	0.735350932597523	0.0011700513031752	-0.217647	0.418086841611303	-0.552941	0.0263144998706666	0.552941176470588	0.0263144998706665	0.708433281384293	0.00212910595462858
L-phenylalanine	-0.351034	0.182487888145899	0.667649835258729	0.00471174592396506	-0.450146	0.0801856714778959	-0.155569	0.565075322728068	0.153767686068213	0.569643311165027	-0.196039	0.466824849026551	0.586430583754458	0.0169578167342037	-0.673529	0.0042327392484605	-0.817647	0.000109363080819865	-0.597059	0.014609731954981	0.188235294117647	0.485086609145468	-0.229514	0.39250366193088	0.679482381250278	0.00378839118665579	0.61732656227057	0.0108407078188208	0.638480667698882	0.00777000645874417	0.79725932733366	0.000216718222704773	-0.264706	0.321804395868616	-0.385294	0.140544177373676	0.564705882352941	0.0226632048441846	0.813677250015663	0.000125735589895115
2-hydroxycinnamic acid	-0.351034	0.182487888145899	0.625516593227839	0.00955548840158396	-0.343888	0.192171501804492	-0.249558	0.351271282734752	0.185951620361559	0.490494673749282	-0.196039	0.466824849026551	0.503532019558802	0.0467626785895261	-0.482353	0.0584589767747195	-0.723529	0.00153448118982397	-0.488235	0.0550150297781375	0.0529411764705882	0.845610441149366	-0.246124	0.358157349861496	0.593414612958576	0.0153842585851111	0.513653399141162	0.0418348979032843	0.538009090548296	0.0315785112082489	0.726291167514186	0.00144202820011262	-0.214706	0.424559233620103	-0.561765	0.023537016474281	0.5	0.0485802888870239	0.684871198854882	0.00341925791092534
succinic acid	0.265487880754859	0.320323295606031	-0.502358	0.0473611718979032	0.168080249996652	0.533786649711066	0.184738061212367	0.493380214866587	-0.0858238	0.751978634594665	0.140028008402801	0.604990421586917	-0.38993	0.135425162530426	0.344117647058824	0.191855631425543	0.711764705882353	0.00198404324776996	0.423529411764706	0.102109322085997	-0.185294	0.492057050205944	0.459028097555744	0.0736903789801583	-0.536036	0.0323298297817309	-0.463388	0.0706459697692479	-0.528286	0.035413153769924	-0.622104	0.0100755230948537	0.120588235294118	0.656424514748595	0.597058823529412	0.014609731954981	-0.282353	0.289349829063274	-0.532503	0.0337090461941712
beta-alanyl-L-arginine	0.40413155181573	0.120544092200981	-0.311138	0.240796800789207	0.35161615516541	0.181713365689578	0.382440196895777	0.143760142764507	-0.493487	0.0520691641173877	0.0840168050416806	0.757052724320426	-0.307032	0.247389101273807	0.408823529411765	0.115887838148784	0.458823529411765	0.0738355344954811	0.408823529411765	0.115887838148784	-0.15	0.579248630664254	0.075498042361142	0.781095697901582	-0.468088	0.06746726051693	-0.311019	0.240985175599924	-0.230112	0.3912366924622	-0.502817	0.0471264900343627	0.126470588235294	0.640694440816884	0.423529411764706	0.102109322085997	-0.391176	0.134071286197255	-0.361285	0.169165568882151
